# Supplementary material for: Enhancers and super-enhancers have an equivalent regulatory role in embryonic stem cells through regulation of single or multiple genes
Source: PubMed Central journal article supplement — Genome Res. 2017 Feb;27(2):246–58. doi: 10.1101/gr.210930.116 (PMC5287230; doi:10.1101/gr.210930.116), 2017-02
Supplement: supp_gr.210930.116_Supplemental_Data.pdf [file supp_gr.210930.116_Supplemental_Data.pdf]

**Supplemental data for: Enhancers and super-enhancers have an equivalent regulatory role in embryonic stem cells through regulation of single or multiple genes**

Sakthi D Moorthy\*<sup>1</sup>, Scott Davidson\*<sup>1</sup>, Virlana M Shchuka<sup>1</sup>, Gurdeep Singh<sup>1</sup>, Nakisa Malek-Gilani<sup>1</sup>, Lida Langroudi<sup>1</sup>, Alexandre Martchenko<sup>1</sup>, Vincent So<sup>1</sup>, Neil N Macpherson<sup>1</sup>, and Jennifer A Mitchell<sup>1,2</sup>.

\* These authors contributed equally

1) Department of Cell and Systems Biology, University of Toronto, Toronto, ON, M5S 3G5, Canada.

2) Centre for the Analysis of Genome Evolution and Function, University of Toronto, Toronto, ON, M5S 3G5, Canada.

**Contact:** Jennifer A Mitchell, Department of Cell and Systems Biology, University of Toronto, 25 Harbord Street, Toronto, Ontario M5S 3G5, Canada. Phone: (416)978-6711, Fax: (416)978-8532, Email: [ja.mitchell@utoronto.ca](mailto:ja.mitchell@utoronto.ca).

## List of Supplemental Tables and Figures

**Table S1: Enhancer clusters identified.**

**Table S2: Enhancer cluster regulated gene determined by RNA-seq.**

**Table S3: MTL regions with high and low H3K27ac found inside and outside super-enhancers.**

**Table S4: Gene set analysis of MTL regions with high H3K27ac that are found outside of super-enhancers.**

**Table S5: gRNA target sequences.**

**Table S6: Clones analyzed by RNA-seq**

**Table S7: Allele specific gene expression primers.**

**Table S8: Predicted enhancers mapped to mm10.**

**Table S9: Enhancer cloning primers.**

**Figure S1: Expression of *castaneus* alleles is unaffected by enhancer cluster deletion on the 129 allele.**

**Figure S2: Schematic representation of additional enhancer cluster loci.**

**Figure S3: Schematic representation of the *Elt4* locus.**

**Figure S4: Additional clones display expression changes for target genes identified by RNA-seq.**

**Figure S5: EC(*Med13l*) contains multiple active enhancers.**

**Figure S6: Chromatin conformation at the *Med13l* locus.**

**Figure S7: Enhancer activity correlation to MED1 and EP300 ChIP-seq.**

**Figure S8: Heterozygous deletion of enhancers at the *Ifitm* and *Six* loci cause reduced expression of the linked allele.**

**Figure S9: Allele specific primer validation by real time quantitative PCR.**

**Table S1: Enhancer clusters identified.**

Provided as a separate spreadsheet.

**Table S2: Enhancer cluster regulated gene determined by RNA-seq.**

| TAD (mm10) |           |           |                                | Deleted Region |     |           |           | Regulated Gene | Chi-square P value |
|------------|-----------|-----------|--------------------------------|----------------|-----|-----------|-----------|----------------|--------------------|
| Chr        | Start     | End       | # of genes in TAD <sup>φ</sup> | Name           | Chr | Start     | End       |                |                    |
| 2          | 19398373  | 20838373  | 7                              | EC(Etl4)       | 2   | 20642059  | 20658958  | Etl4           | < 0.001            |
| 2          | 152894264 | 154614264 | 16                             | EC(Cbfa2t2)    | 2   | 154419404 | 154431952 | Cbfa2t2        | < 0.001            |
| 3          | 95036078  | 96476077  | 18                             | EC(Mcl1)       | 3   | 95644053  | 95655885  | Mcl1           | < 0.001            |
| 4          | 122882757 | 123722757 | 6                              | EC(Macf1)      | 4   | 123618309 | 123637993 | Macf1          | < 0.001            |
| 5          | 118146950 | 118777277 | 2                              | EC(Med13l)     | 5   | 118432886 | 118452483 | Med13l         | < 0.001            |
| 7          | 3040000   | 4528398   | 31                             | EC(Mir290)     | 7   | 3199611   | 3215602   | AU018091       | < 0.001            |
|            |           |           |                                |                |     |           |           | mir291-5 TU    | < 0.001            |
|            |           |           |                                |                |     |           |           | Prkcg          | < 0.01             |
| 8          | 88396101  | 89836101  |                                | EC(Sall1)      | 8   | 88986501  | 89018827  | Sall1          | < 0.001            |
| 9          | 78272193  | 78552193  | 4                              | EC(DppDn)      | 9   | 78358933  | 78365818  | Dppa5a         | < 0.001            |
| 9          | 78272193  | 78552193  | 4                              | EC(DppUp)      | 9   | 78368337  | 78376479  | Dppa5a         | < 0.001            |
|            |           |           |                                |                |     |           |           | Ooep           | < 0.001            |
| 10         | 61686969  | 62911079  | 12                             | EC(Tet1)       | 10  | 62891757  | 62906804  | Tet1           | < 0.001            |
| 11         | 33140000  | 33940000  | 2                              | EC(Ranbp17)    | 11  | 33524486  | 33543505  | Ranbp17        | < 0.001            |
| 12         | 85699050  | 86699050  | 6                              | EC(Esrrb)      | 12  | 86496798  | 86505014  | Esrrb          | < 0.001            |

<sup>φ</sup> The chi-square test for significance was conducted on all genes in the TAD.

**Table S3: MTL regions with high and low H3K27ac found inside and outside of super-enhancers.**

Provided as a separate spreadsheet.

**Table S4: Gene set analysis of MTL regions with high H3K27ac that are found outside of super-enhancers.**

| <b>Function</b>                                               | <b>False Discovery Rate</b> |
|---------------------------------------------------------------|-----------------------------|
| histone methyltransferase complex                             | 2.43E-04                    |
| methyltransferase complex                                     | 3.85E-04                    |
| stem cell differentiation                                     | 4.95E-03                    |
| ESC/E(Z) complex                                              | 5.46E-03                    |
| stem cell maintenance                                         | 5.46E-03                    |
| CCR4-NOT complex                                              | 8.60E-03                    |
| PcG protein complex                                           | 1.76E-02                    |
| histone lysine methylation                                    | 1.76E-02                    |
| Wnt signaling pathway                                         | 2.90E-02                    |
| morphogenesis of an epithelial fold                           | 4.54E-02                    |
| histone methylation                                           | 5.55E-02                    |
| histone-lysine N-methyltransferase activity                   | 9.13E-02                    |
| multicellular organism growth                                 | 9.46E-02                    |
| histone methyltransferase activity (H3-K4 specific)           | 9.46E-02                    |
| lysine N-methyltransferase activity                           | 9.46E-02                    |
| transcription regulatory region sequence-specific DNA binding | 9.46E-02                    |
| protein-lysine N-methyltransferase activity                   | 9.46E-02                    |
| regulation of stem cell maintenance                           | 9.46E-02                    |
| macromolecule methylation                                     | 9.46E-02                    |
| protein methylation                                           | 9.61E-02                    |
| morphogenesis of a branching structure                        | 9.61E-02                    |
| protein alkylation                                            | 9.61E-02                    |

**Table S5: gRNA target sequences.**

| <b>Target</b>          | <b>5' gRNA</b>       | <b>3' gRNA</b>       |
|------------------------|----------------------|----------------------|
| EC( <i>Sall1</i> )     | GTCTAGTGGTCTCTATAGCG | CAGAGCTACACCTCCGGAG  |
| EC( <i>Tet1</i> )      | AATAGGAAGTTATGTCTATA | GGGTTTAGTAAGTCGTATTG |
| EC( <i>Mir290</i> )    | AATAACATGGTGAGAATCGC | TCTCTGCTTTCTCGAGTA   |
| EC( <i>Ranbp17</i> )   | TGGGCATGGTAGCGCATGGG | GTAGGCAGATACGTCCCTGA |
| EC( <i>Med13l</i> )    | AGTCATTGACCGTTAAGTGG | ACAGAATAGGGTGCGGCTTT |
| SE( <i>Med13l</i> )    | CTCAAATTTCCGCTTAGGTG | TAGTGGGCCGGTTGTTTATA |
| EC/SE( <i>Med13l</i> ) | AGTCATTGACCGTTAAGTGG | TAGTGGGCCGGTTGTTTATA |
| EC( <i>Med13lA</i> )   | AGTCATTGACCGTTAAGTGG | TGCCTTCTAAATGCGATTAG |
| EC( <i>Med13lB</i> )   | TGCCTTCTAAATGCGATTAG | ACAGAATAGGGTGCGGCTTT |
| EC( <i>Mcl1</i> )      | TGGTAATGGCTGACGACTAG | TGACTTGACTACCGTACTGC |
| EC( <i>Cbfa2t2</i> )   | TAGTCTATATCGCCAATTCT | AGGATGTCTCAGCTAACGTT |
| EC( <i>Esrrb</i> )     | CCTTCAGGAACGCACTCCAA | TTTTGAGGCGCACTACCTTC |
| EC( <i>DppUp</i> )     | TGTGTATTCGAATCTGGGGG | AATTAATGTATCCTCTCACG |
| EC( <i>DppDn</i> )     | GTCACTGTCGTTCTATAGGT | TCCTGATTGACCTAGGTCC  |
| EC( <i>DppUpA</i> )    | TGTGTATTCGAATCTGGGGG | CTCCCAAACATTTAGCACGA |
| EC( <i>DppUpB</i> )    | CTCCCAAACATTTAGCACGA | AATTAATGTATCCTCTCACG |
| EC( <i>Macf1</i> )     | AGGCACACCGGTATCTCCTT | CCTGTCTATCTTGAAGCGC  |
| EC( <i>Et14</i> )      | TTCCTGAGCTTTATAGGCGT | CCAAGCACATTATCCGACTA |
| EC( <i>Lifr</i> )      | TTTCATCGAATACCTTAACC | GCAAGCATTAGGCGGACGGT |
| EC( <i>Jarid2</i> )    | TTGTCTGCCGGAGATTGGC  | CGTAATGATCCGAATGGGTT |
| EC( <i>Ifitm</i> )     | GCTTTTGAGGCTCTGATCGA | AGGGAAGCAGAGTTGTCGGG |
| EC( <i>Six</i> )       | ATTGACATCTTAACCGAGTC | TAGGCTAGCAAGTAGCTCGA |

**Table S6: Clones analyzed by RNA-seq**

| GEO sample | Clone Name                                           | Deletion (mm10)                                                                                           |
|------------|------------------------------------------------------|-----------------------------------------------------------------------------------------------------------|
| GSM2091415 | EC( <i>Mir290</i> )_47_doubleΔ                       | Δ(129/Cast): Chr7:3199611-3215602                                                                         |
| GSM2091416 | EC( <i>Mir290</i> )_67_129Δ                          | Δ(129): Chr7:3199611-3215602                                                                              |
| GSM2091417 | EC( <i>Sall1</i> )_1_129Δ                            | Δ(129): Chr8:88986501-89018827                                                                            |
| GSM2091418 | EC( <i>Sall1</i> )_25_doubleΔ                        | Δ(129/Cast): Chr8:88986501-89018827                                                                       |
| GSM2091419 | EC( <i>Sall1</i> )_54_129Δ                           | Δ(129): Chr8:88986501-89018827                                                                            |
| GSM2091420 | EC( <i>Tet1</i> )_30_129Δ                            | Δ(129): Chr10:62891757-62906804                                                                           |
| GSM2091421 | EC( <i>Tet1</i> )_59_129Δ                            | Δ(129): Chr10:62891757-62906804                                                                           |
| GSM2091422 | EC( <i>Cbfa2t2</i> )_9_129Δ                          | Δ(129): Chr2:154419404-154431952                                                                          |
| GSM2091424 | EC( <i>Ranbp17</i> )_16_129Δ                         | Δ(129): Chr11:33524486-33543505                                                                           |
| GSM2091425 | EC( <i>Ranbp17</i> )_18_129Δ                         | Δ(129): Chr11:33524486-33543505                                                                           |
| GSM2091426 | EC( <i>Macf1</i> )_129Δ_EC( <i>Med13l</i> )_CastΔ_3* | Δ(129): Chr4:123618309-123637993,<br>Δ(Cast): Chr5:118432886-118452483,<br>Δ(129): Chr9:78358933-78365818 |
| GSM2091427 | EC( <i>Macf1</i> )_129Δ_13*                          | Δ(129): Chr4:123618309-123637993,<br>Δ(129): Chr9:78358933-78365818                                       |
| GSM2091428 | EC( <i>Med13l</i> )_129Δ_28*                         | Δ(129): Chr5:118432886-118452483,<br>Δ(Cast): Chr9:78358933-78365818                                      |
| GSM2091429 | EC( <i>Esrrb</i> )_129Δ_EC( <i>Med13l</i> )_129Δ_34* | Δ(129): Chr12:86496798-86505014,<br>Δ(129): Chr5:118432886-118452483                                      |
| GSM2091430 | EC( <i>Esrrb</i> )_129Δ_65*                          | Δ(129): Chr12:86496798-86505014,<br>Δ(Cast): Chr9:78358933-78365818                                       |
| GSM2091431 | EC( <i>DppDn</i> )_2_129Δ                            | Δ(129): Chr9:78358933-78365818                                                                            |
| GSM2091432 | EC( <i>DppDn</i> )_5_129Δ                            | Δ(129): Chr9:78358933-78365818                                                                            |
| GSM2091433 | EC( <i>DppUp</i> )_17_129Δ                           | Δ(129): Chr9:78368337-78376479                                                                            |
| GSM2091434 | EC( <i>DppUp</i> )_43_doubleΔ                        | Δ(129): Chr9:78368337-78376479,<br>Δ(Cast): Chr9:78358933-78365818                                        |
| GSM2091435 | EC( <i>Et14</i> )_15_129Δ                            | Δ(129): Chr2:20642059-20658958                                                                            |
| GSM2091437 | EC( <i>Mcl1</i> )_31_129Δ                            | Δ(129): Chr3:95644053-95655885                                                                            |
| GSM2091438 | EC( <i>Mcl1</i> )_38_129Δ                            | Δ(129): Chr3:95644053-95655885                                                                            |

\* Multiple deletions [EC(*Macf1*), EC(*Med13l*), EC(*DppDn*), EC(*Esrrb*)] were targeted in the same cells for these clones. These deletions were all located on different chromosomes and as heterozygous deletions did not show effects on gene expression outside of the TAD in which the deletion was made no compound effect of these deletions were observed.

**Table S7: Allele specific gene expression primers.**

| <b>Primer Name</b> | <b>Sequence (5'-3')*</b>            |
|--------------------|-------------------------------------|
| Ooep_EX1_F1B       | CCATGTAGAGCACCCAGAGGAT <b>a</b>     |
| Ooep_EX1_R1B       | TCTGACTCTCAGAAGCTGCT <b>t</b> AAc   |
| Ooep_EX1_F1C       | CATGTAGAGCACCCAGAGGATT <b>g</b>     |
| Ooep_EX1_R1C       | TGACTCTCAGAAGCTGCT <b>c</b> AAc     |
| Dppa5a_IN1_F3B     | GGGAAAGGCAATGAGCA <b>t</b> A        |
| Dppa5a_IN1_F3C     | GGGAAAGGCAATGAGCA <b>g</b> A        |
| Dppa5a_UTR_R2      | AAACTTCCTGAACCTGGAGCTGT             |
| Mcl1_UTR_F1        | AGCAAAGTCCCTCTCAGCA                 |
| Mcl1_UTR_R1B       | GCAGAGTAATGGATATTTATTGAGCT <b>t</b> |
| Mcl1_UTR_R1C       | GCAGAGTAATGGATATTTATTGAGCT <b>c</b> |
| Etl4_EX7_F1        | TAGCCATTTGCCCTACCTTGG               |
| Etl4_EX7_R1B       | CAGGGTGCCGGGTT <b>Cc</b> TT         |
| Etl4_EX7_R1C       | CAGGGTGCCGGGTT <b>Ct</b> TT         |
| Esrrb_EX6_F1       | GCTGCAGGACTATGAGCTGAG               |
| Esrrb_EX6_R1B      | CTTGCCCTGCAGTTTCAC <b>a</b>         |
| Esrrb_EX6_R1C      | CTTGCCCTGCAGTTTCAC <b>g</b>         |
| Macf1_EX_F3B       | GAAACACCTGAATCTCAAACAAG <b>t</b>    |
| Macf1_EX_R4        | GTGCTGCAGAAGACAGAGGA                |
| Macf1_EX_F2        | AGATGCAGAAAGTTGGTTCTCC              |
| Macf1_EX_R3C       | CATTCCAAAAGTTTGCCTTTACA <b>a</b>    |
| Med13l_UTR_F1      | CCTGCTCTCAGCCTCTGTTT                |
| Med13l_UTR_R1B     | CCCCAGCACTAGATCCTGT <b>c</b>        |
| Med13l_UTR_R1C     | CCCCAGCACTAGATCCTGT <b>t</b>        |
| Ranbp17_UTR_F2B    | GGTTGAATACAGTTTCTAGACCCTT <b>t</b>  |
| Ranbp17_UTR_F2C    | GGTTGAATACAGTTTCTAGACCCTT <b>c</b>  |
| Ranbp17_UTR_R2     | AGAACAAGCAGCTAAAGCCCTA              |
| cbfa2t2_IN_F2B     | ACCTAGGCTATATAGTGAGAACCTAT <b>c</b> |
| cbfa2t2_IN_F2C     | ACCTAGGCTATATAGTGAGAACCTAT <b>t</b> |
| cbfa2t2_EX_R2      | TTTGCTCTGCCTCAGCTACA                |
| Sall1_EX_F2B       | CGTGGCCTTCTTGTCAT <b>g</b>          |
| Sall1_EX_R2B       | CAACAGTACTCTGAACTCCCCA <b>g</b> T   |
| Sall1_EX_F2C       | CCGTGGCCTTCTTGTCAT <b>a</b>         |
| Sall1_EX_R2C       | CAACAGTACTCTGAACTCCCCA <b>a</b> T   |
| Tet1_EX_F2B        | TTGGCTTTGCTGATGGTAC <b>a</b> c      |
| Tet1_EX_R2B        | AGGAATGCTGAAAGTACACCAG <b>a</b>     |
| Tet1_EX_F2C        | TTGGCTTTGCTGATGGTAC <b>a</b> t      |
| Tet1_EX_R2C        | AGGAATGCTGAAAGTACACCAG <b>g</b>     |
| Mir290_F2B         | TGTGGGGCACACTTCTGG <b>a</b> c       |
| Mir290_F2C         | TGTGGGGCACACTTCTGG <b>a</b> t       |

|                  |                                           |
|------------------|-------------------------------------------|
| Mir290_R2        | ACTGGTTGCTCCCATAGCAC                      |
| Lifr_EX1_F2B     | AAGGTTCTTCAAACAGCAC <b>g</b>              |
| Lifr_EX1_F2C     | AAGGTTCTTCAAACAGCAC <b>a</b>              |
| Lifr_EX1_R2      | GTCACCTCTGTGTGGCTTTTC                     |
| Jarid2_EX_F2B    | GGTGCTGATGGAGAAGG <b>Ag</b>               |
| Jarid2_EX_R2B    | ACGGAATCCATTCT <b>a</b> GGTG              |
| Jarid2_EX_F2C    | GGTGCTGATGGAGAAGG <b>Aa</b>               |
| Jarid2_EX_R2C    | TACGGAATCCATTCT <b>g</b> GGT              |
| Six4_EX_F2B      | AGTAGTGTCA <b>Ag</b> TGGAAAACCAC <b>a</b> |
| Six4_EX_F2C      | GTGTCAG <b>Aa</b> TGGAAAACCAC <b>g</b>    |
| Six4_EX_R2       | GAAATTGGTGAATGTCCCTCA                     |
| Six1_EX_F3B      | GGCGAAGAGACCAGTC <b>Ga</b>                |
| Six1_EX_F3C      | GGCGAAGAGACCAGTC <b>g</b>                 |
| Six1_EX_R3       | GCAACCAGCAGCATCCAC                        |
| Ifitm1_IN_F3B    | TAGGAAGG <b>Tg</b> ATGGGGAG <b>Ct</b>     |
| Ifitm1_IN_F3C    | TAGGAAGG <b>Ta</b> ATGGGGAG <b>Cc</b>     |
| Ifitm1_EX_R3     | ACAGACAACGATGACGACGA                      |
| Ifitm2_EX_F2B    | GTAGGCATAGGCA <b>Ac</b> GAAGC             |
| Ifitm2_EX_R2B    | TTGTCCACCAATGCCG <b>Gg</b>                |
| Ifitm2_EX_F1C    | CTTCACAGAGTAGGCATAGGCA <b>t</b>           |
| Ifitm2_EX_R1     | AGCCTTCTGTCCACCAATG                       |
| Ifitm3_EX_F1B    | GGTTTTGAGCGTTAAGAACAATG <b>at</b>         |
| Ifitm3_EX_R2B    | CTGCTCCAGTCTAGGG <b>at</b> CG             |
| Ifitm3_EX_F1C    | GGTTTTGAGCGTTAAGAACAATG <b>ac</b>         |
| Ifitm3_EX_R2C    | TGTTCTGCTCCAGTCTAGGG <b>ac</b>            |
| AU018091_UTR_F2  | AACAACAACAAGCACAGTCCA                     |
| AU018091_UTR_R2B | CCCCAC <b>Ca</b> TAAACAGTATCAT <b>Aa</b>  |
| AU018091_UTR_R2C | CCCCAC <b>Ct</b> TAAACAGTATCAT <b>Ag</b>  |
| Prkcc_UTR_F1     | CCTAGCCTTCTGGCCTCTTT                      |
| Prkcc_UTR_R1B    | GGCATAAACTACCAAGTGGG <b>Gg</b>            |
| Prkcc_UTR_R1C    | GGCATAAACTACCAAGTGGG <b>Ga</b>            |
| Gapdh_IN_F1      | GCACCAGCATCCCTAGACC                       |
| Gapdh_EX_R1      | CTTCTTGTGCAGTGCCAGGTG                     |

\* SNPs indicated in bold/lower case.

### Table S8: Predicted enhancers mapped to mm10

Provided as a separate spreadsheet.



**Table S9: Enhancer cloning primers.**

| Name      | Region (mm10)            | Forward Primer           | Reverse Primer            |
|-----------|--------------------------|--------------------------|---------------------------|
| Mcl1_1    | Chr3:95636028-95636838   | GTGGTGTACTCGCTGTTTG      | ATTGGCCAGCGAGTTGTAAAG     |
| Mcl1_2    | Chr3:95650931-95654071   | GCCAGGCGTCTAAGTTCTG      | AATCCGGTTAAACTGATCTCC     |
| Mcl1_3    | Chr3:95662963-95664356   | TGTTTGTCTTACACGTCTCTCAGG | GGGTTGCCTTACACAGATGTTG    |
| Macf1_1   | Chr4:123622998-123626154 | CGCTGTGAACTGTAAATCGAAG   | TCATCTTGGCAAATTGTCTGTC    |
| Macf1_2   | Chr4:123632303-123634109 | TATCTTCAAGTTCGTCCAAGC    | TGTAATGTGGTGTGGTCTTCC     |
| Cbfa2t2_2 | Chr2:154427556-154429103 | AAAGCTAGATTGCTGGTCATGC   | GGTAAAGAACGAGAGACATAGAAGG |
| Cbfa2t2_3 | Chr2:154465672-154467303 | AGGTTGTGTAACACGAACATCG   | CCGCCCTATATGACCCAGAC      |
| Klf4_1.5  | Chr4:55470962-55472215   | GTGAGCACATGGATCGTTTCAG   | GTTTTGGCTCTTGCTACAGTGC    |
| Klf4_2    | Chr4:55474798-55476568   | ACAAGATGCCGCTGAGCATAAC   | TAGATAGCAGGACAGGGGATTC    |
| Klf4_3    | Chr4:55476545-55478544   | AGGAATCCCCTGCTCTGCTATC   | AGCAGCACAACTGACACAG       |
| Klf4_4    | Chr4:55514505-55515435   | TCTCTGTGGGAAGGTAATGAGG   | ATCCAACGTGCATGCTGATG      |
| Esrrb_1   | Chr12:86465045-86467887  | CCTCATACTCTCATCCCGAGAC   | GCTGACTCCTCTCGACTGAATG    |
| Esrrb_2   | Chr12:86477662-86480598  | TGTGCATTACCTACGACCTCTG   | ATGATAAAACAAAGCGGAACACC   |
| Esrrb_4   | Chr12:86500631-86503118  | GTTTGCCTGTGGCATCTGAC     | CTTCACAGTGGACATCGAGAAC    |
| Esrrb_5   | Chr12:86503837-86505514  | GCCAGACCACCACTACTGAC     | TCATGCCACAAGAAGTACCATC    |
| Dppa5a_1  | Chr9:78368500-78370278   | ATCCCGAAAGAATCAGATACTGG  | CCAGCACAGTAGCACAAGTTACA   |
| Dppa5a_2  | Chr9:78368922-78370654   | GCTAATGTTCTGGACTCAACGAC  | ACTAGCCAAACGGAATATGCTC    |
| Dppa5a_3  | Chr9:78370634-78373173   | AGCATATTCGGTTTGGCTAGTG   | AAAACAGCTGACTCCACTCGTC    |
| Dppa5a_4  | Chr9:78374046-78375410   | CATGTCTCTCTCGGCTCTTC     | CTGGGTTATTTTGTTCGATAG     |
| Tanc1_1   | Chr2:59621790-59623138   | TCTTTATCCAGCAGTGTCACC    | ACACTACCTTGCCCTGAATCTG    |
| Tanc1_2   | Chr2:59632862-59634968   | TAGTATCTTGACCTTGGGTGGG   | TAAGGCCGAACAGAGCTAGCAG    |
| Etl4_1    | Chr2:20495259-20497618   | GGCAAACAGAACTCATGATTAGGC | CTTGAGGCTCTAAATGTTGGGG    |
| Etl4_2    | Chr2:20583333-20584406   | GCAGGAACCACACTCTGTCTTAG  | AACCCAGCTCACATGGATTAC     |
| Etl4_3    | Chr2:20654182-20656518   | TCATCGAGTTTCACTCCAGACC   | AGGACTTTGTACTACTGAGCGG    |
| Gabrp_1   | Chr11:33526880-33528679  | TGATGCCGATAAGTTTAAGCCAAC | ACTCAAGTGAACACATAATCAAACC |
| Gabrp_3   | Chr11:33532954-33534353  | TTTTAAGCACATTAGCTGCC     | TCCCTATCAAGCTGCCATCATC    |
| Gabrp_4   | Chr11:33536553-33538455  | TCTCATTGGGAAGTTATCTGTCCC | AAGGTTGAAGTCTTGAGCCAC     |
| Med13l_1  | Chr5:118433870-118435054 | CTCTCCAACAACCTGTGCTTTG   | TGATTGAGTTATGGGCTGGTTG    |
| Med13l_2  | Chr5:118434651-118436033 | AAAGGAAGGACCAAACCTCAGG   | CACAGAATGTTGGCATGACAGG    |
| Med13l_3  | Chr5:118436044-118437983 | CTCATCTGTGGTGTGCTGTTG    | GTTCAGGAGGGAGAGTTCTGTG    |
| Med13l_4  | Chr5:118444147-118446211 | CACAACTCCTGATTGTGTTTCTC  | GATGATGGCTTTAAATGTCCAGA   |

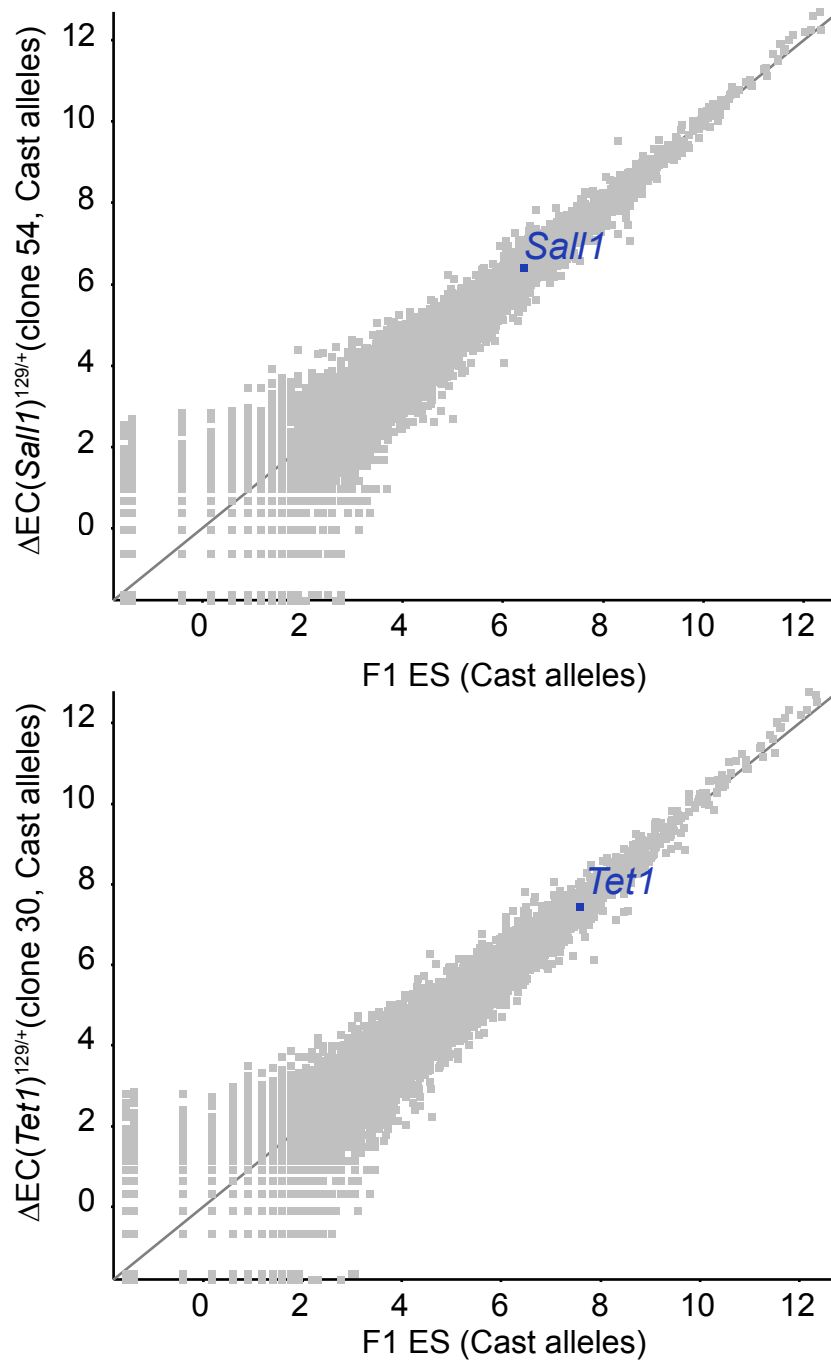

**Figure S1: Expression of castaneus alleles is unaffected by enhancer cluster deletion on the 129 allele.** Scatter plots indicate differences in transcript abundance between F1 ES cells and the  $\Delta EC^{129/+}$  clones. Transcript levels are log<sub>2</sub> transformed reads per million. In each scatter plot the EC target gene is highlighted in blue.

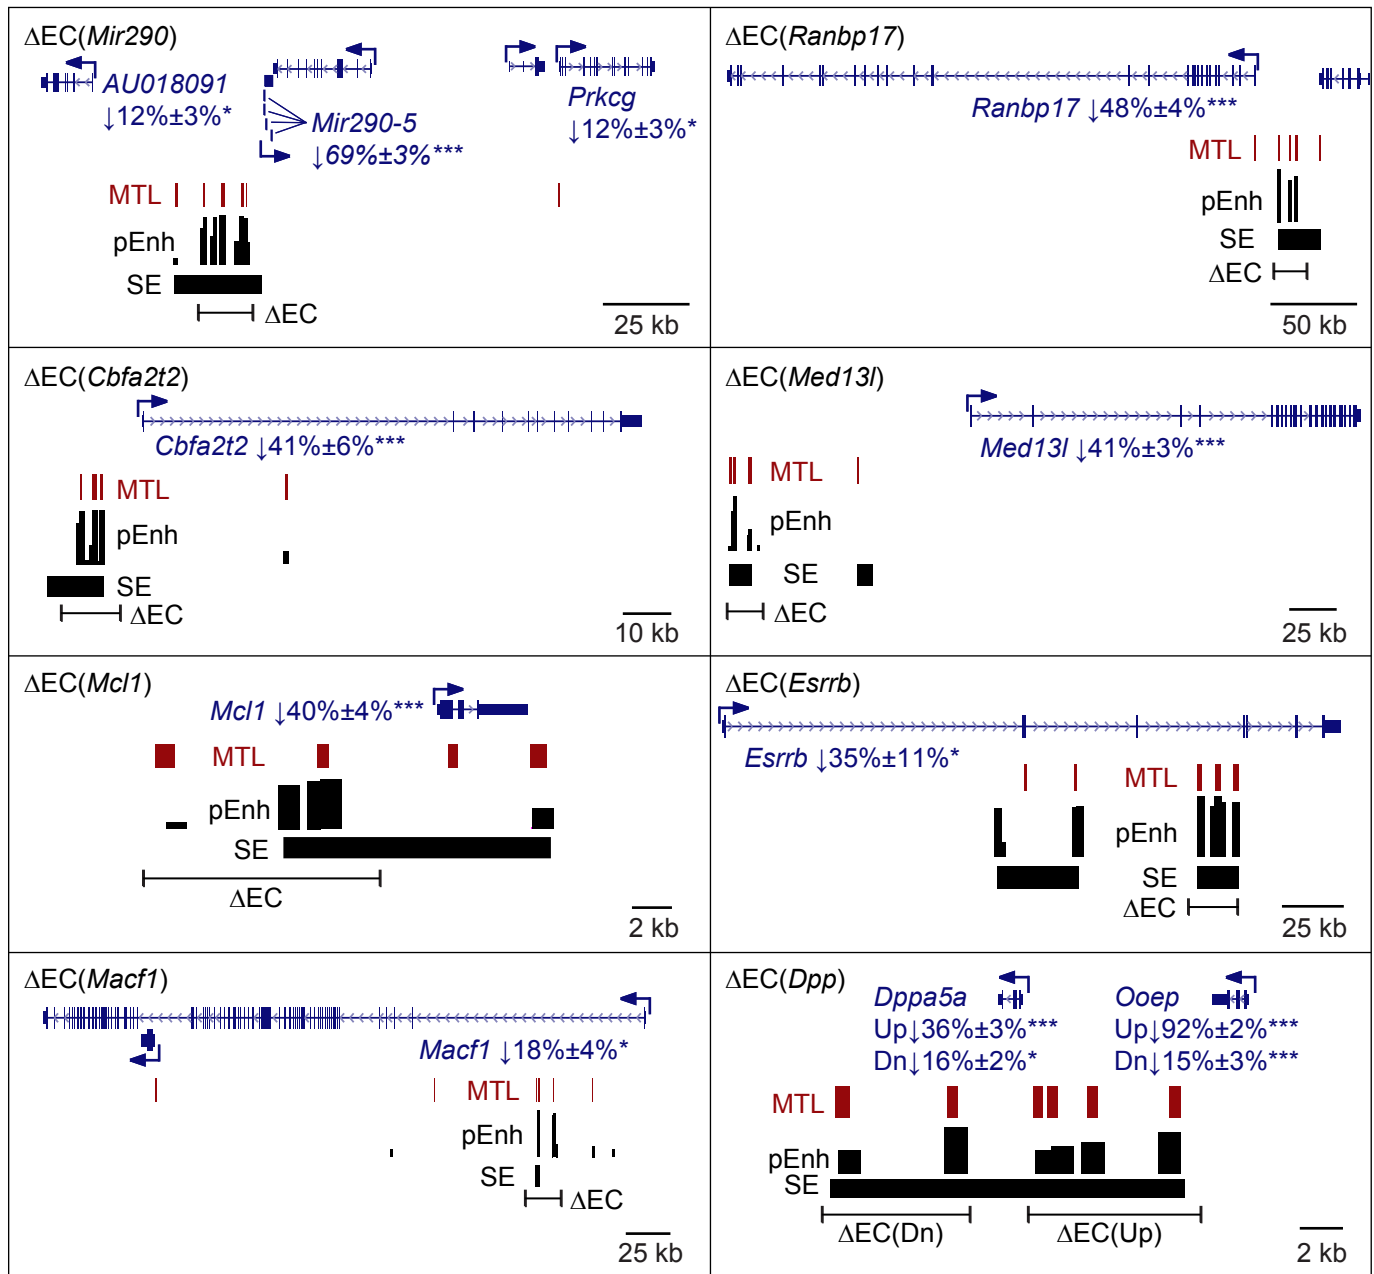

**Figure S2: Schematic representation of additional enhancer cluster loci.** Shown are MTL $\geq$ 3 (red bars). Predicted enhancers (pEnh) and called super-enhancers (SE) are shown in black. Each deleted enhancer cluster ( $\Delta$ EC) is designated by a line that links the 5' and 3' gRNA targets. All data are displayed on the mm10 assembly of the University of California at Santa Cruz Genome Browser. Gene names are followed by the effect on transcript levels after deletion. Gene names are provided only for affected genes.

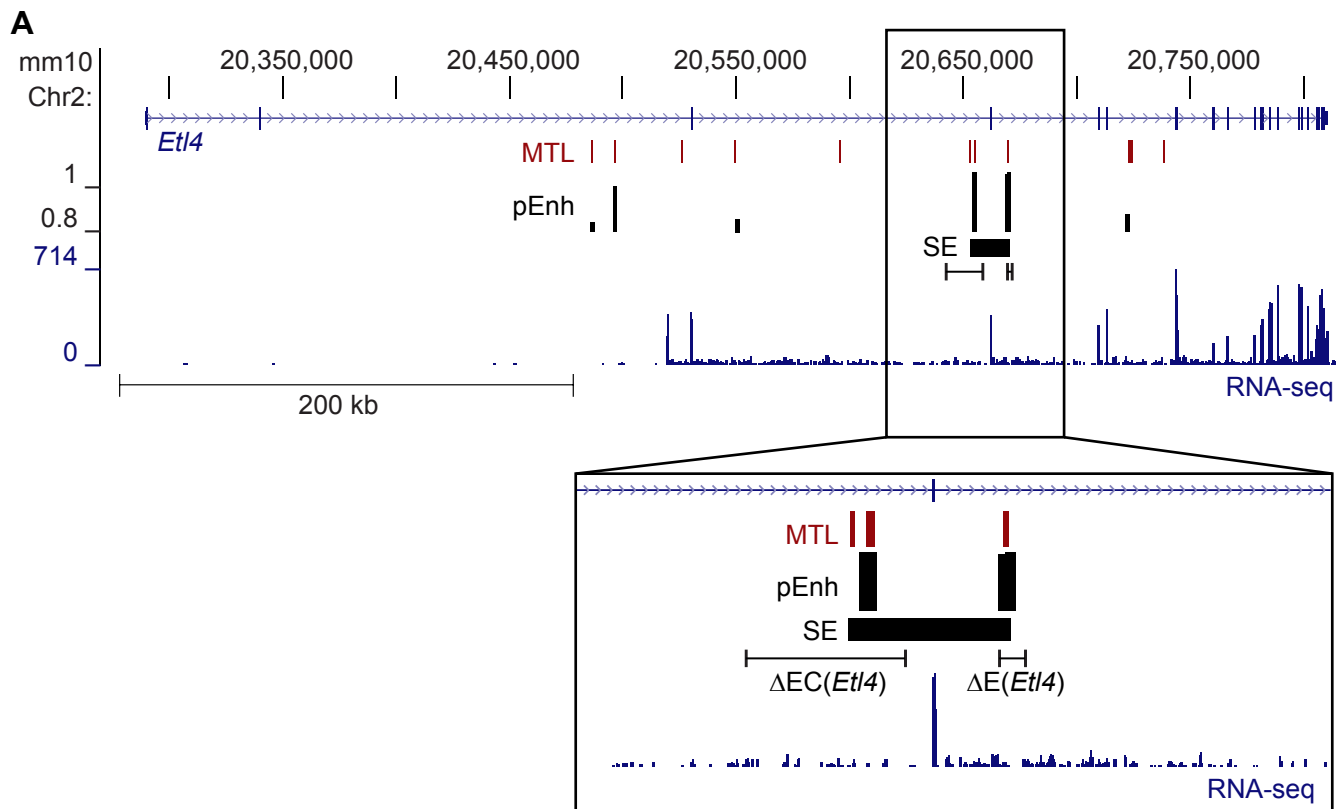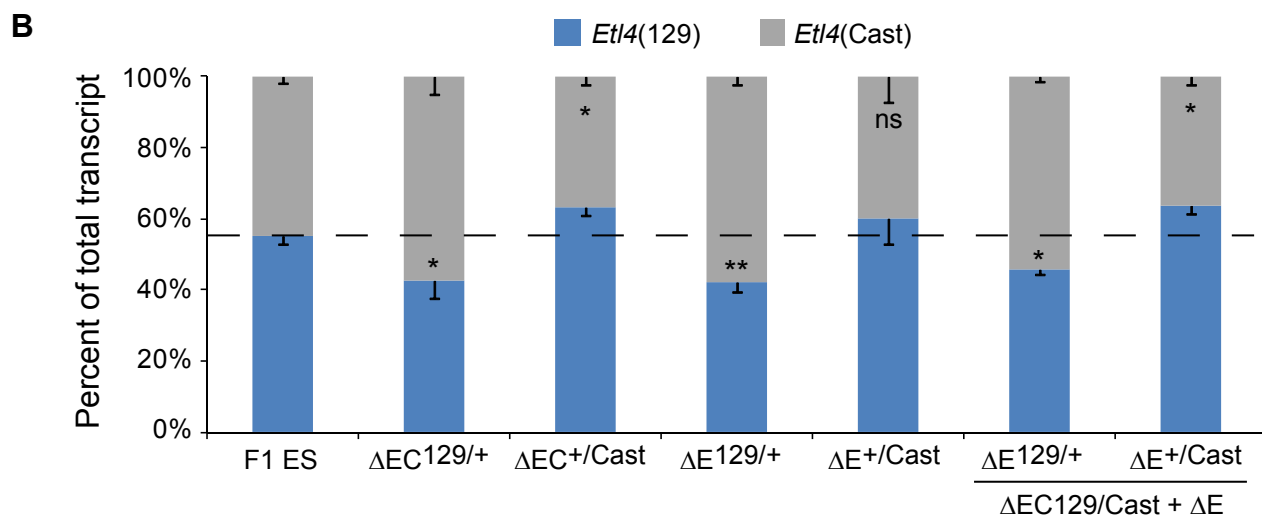

**Figure S3: Schematic representation of the *Etl4* locus.** A) Shown are  $MTL \geq 3$  (red bars) and RNA-seq data obtained from the CODEX database. Predicted enhancers (pEnh) and called super-enhancers (SE) are shown in black. The deleted enhancer cluster ( $\Delta EC$ ) and deleted enhancer ( $\Delta E$ ) is designated by a line that links the 5' and 3' gRNA targets. All data are displayed on the mm10 assembly of the UCSC Genome Browser. B) Deletion of  $EC(Etl4)$ ,  $E(Etl4)$  or both. Allele specific primers detect 129 or Cast RNA in RT-qPCR from F1 ES,  $\Delta 129/+$ ,  $\Delta +/Cast$ , and combined deletion clones. Error bars represent SEM. Significant differences from the F1 ES values are indicated by \*  $P < 0.05$ , \*\*  $P < 0.01$ .

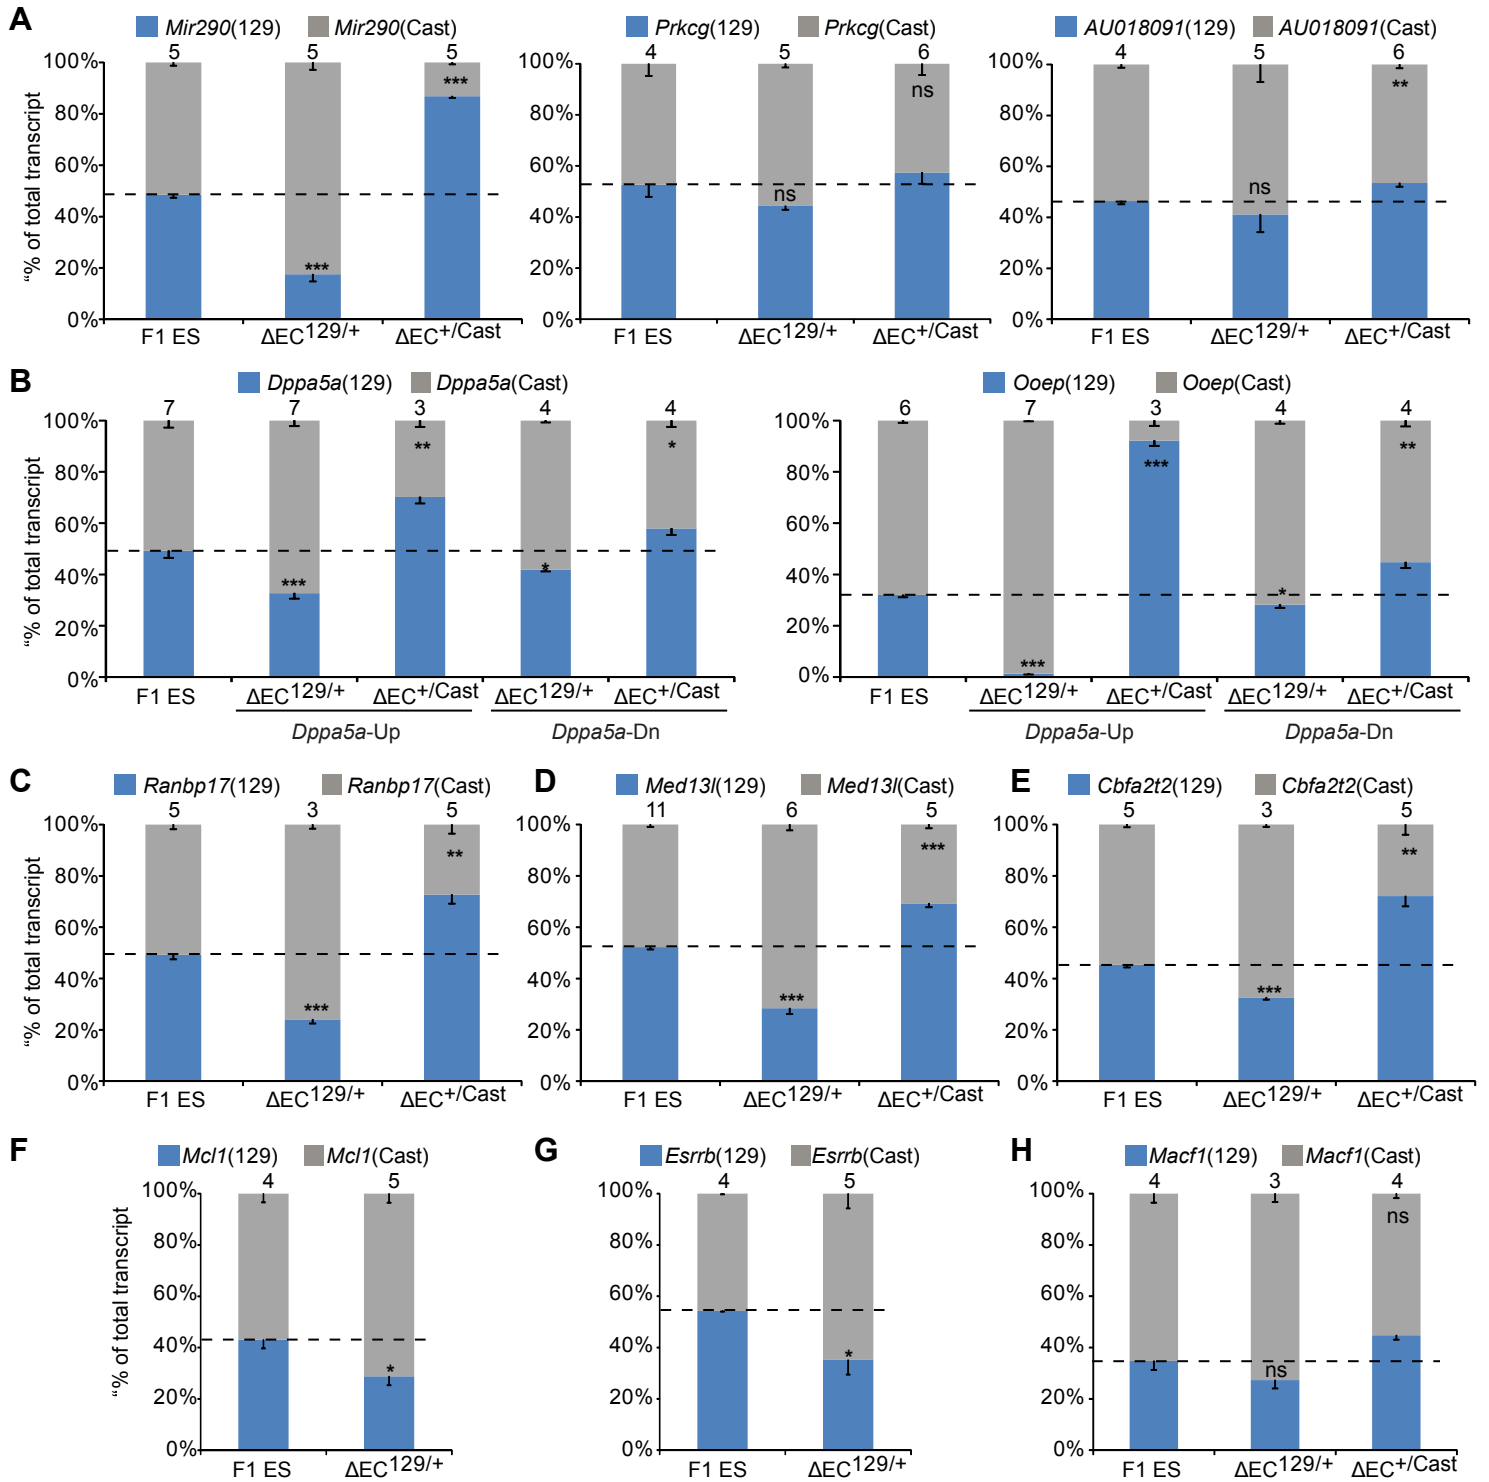

**Figure S4: Additional clones display expression changes for target genes identified by RNA-seq.** Gene expression changes after deletion of enhancer clusters for target genes identified by RNA-seq. The regions deleted are A) Chr7:3199611-3215602, B) *Dppa5a*-Up Chr9:78368337-78376479, *Dppa5a*-Dn Chr9:78358933-78365818, C) Chr11:33524486-33543505, D) Chr5:118432886-118452483, E) Chr2:154419404-154431952, F) Chr3:95644053-95655885, G) Chr12:86496798-86505014, H) Chr4:123618309-123637993 in mm10. Numbers above the bars indicate the number of deleted clones or F1 ES cell isolates analyzed. Significant differences from F1 ES are indicated by \*  $P < 0.05$ , \*\*  $P < 0.01$  and \*\*\*  $P < 0.001$ , ns = not significant.

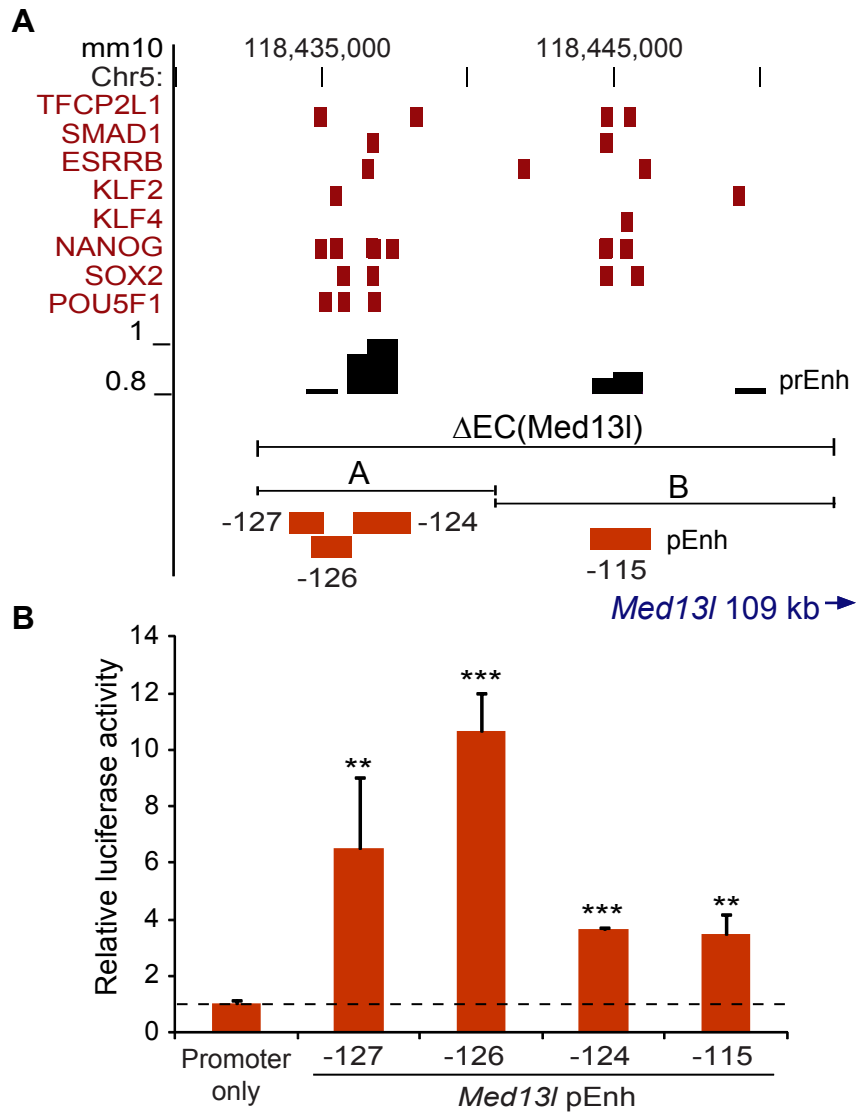

**Figure S5: EC(Med13l) contains multiple active enhancers.** A) Schematic representation of the Med13l EC region. Shown are transcription factor bound regions (red bars) obtained from the CODEX database. Predicted enhancers (prEnh) are shown in black. The deleted enhancer cluster ( $\Delta$ EC) and partial deletions (A/B) are shown with a line that links the 5' and 3' gRNA targets. All data are displayed on the mm10 assembly of the UCSC Genome Browser. B) Enhancer activity was identified in a reporter assay for each enhancer tested within the EC(Med13lA) and EC(Med13lB) regions. Error bars represent SEM. A significant difference from the promoter only vector is indicated by \*\*\*  $P < 0.001$ , or \*\*  $P < 0.01$ .

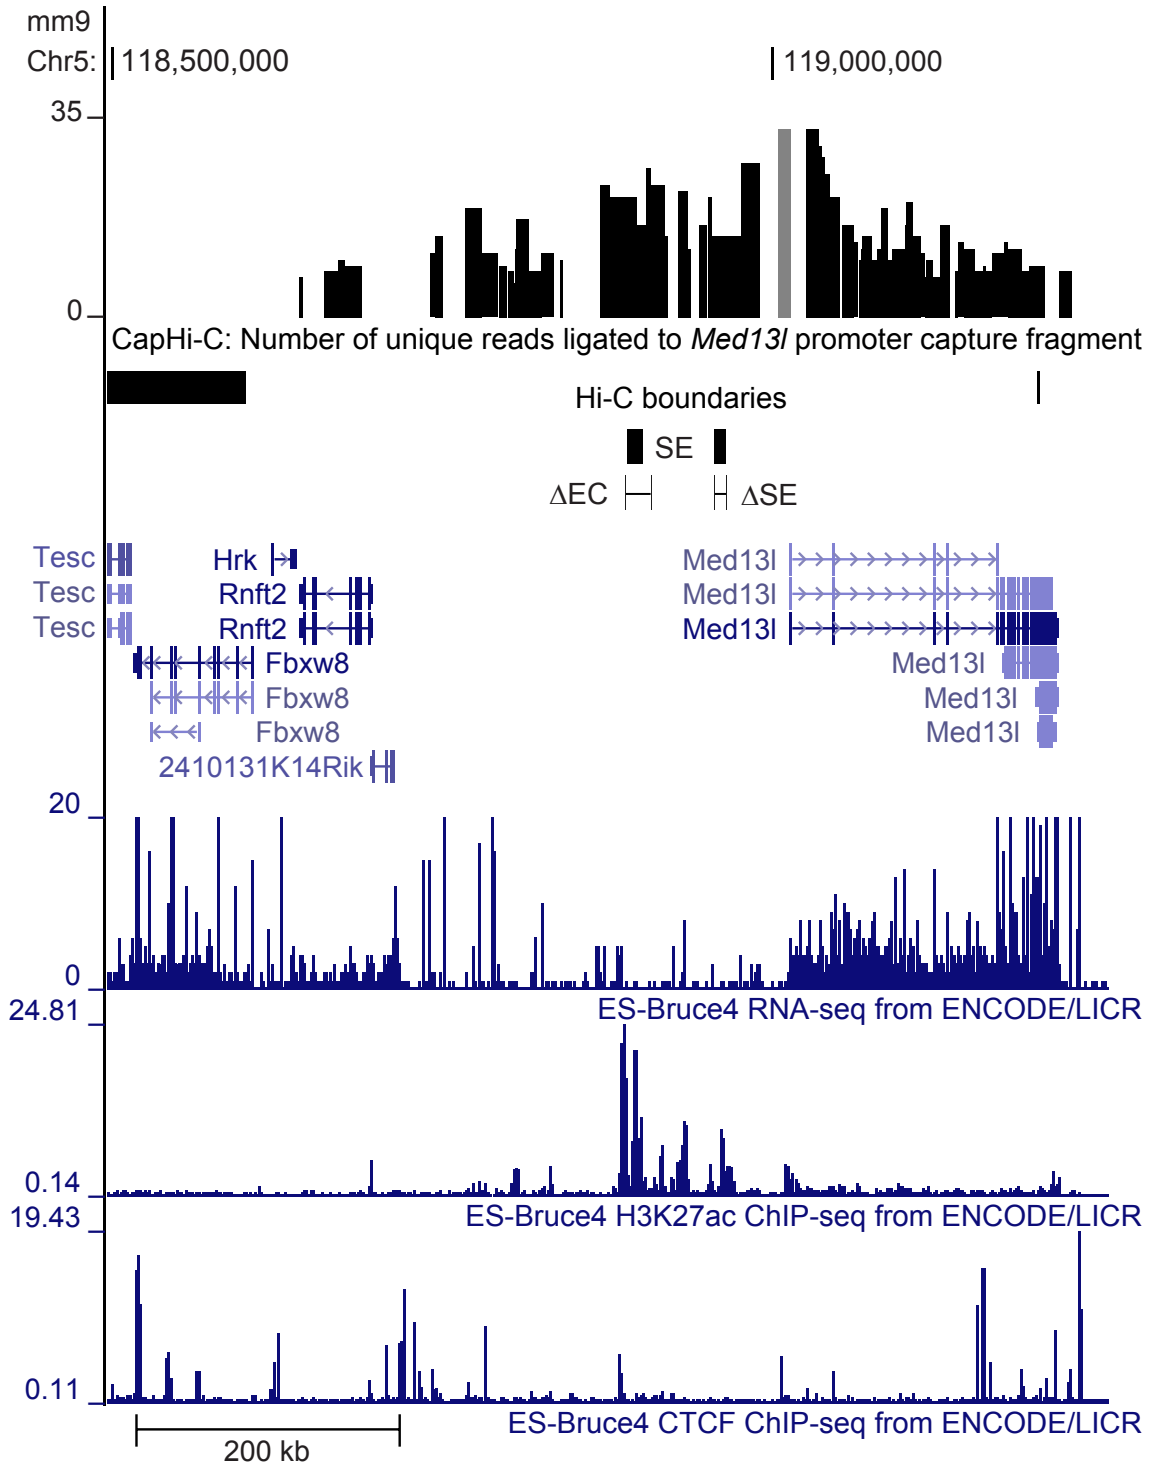

**Figure S6 Chromatin conformation at the *Med13l* locus.** Shown are CTCF and H3K27ac ChIP-seq and RNA-seq data obtained from ENCODE/LICR. The deleted regions ( $\Delta$ EC and  $\Delta$ SE) are shown with a line that links the 5' and 3' gRNA targets. Called super-enhancers (SE) and Hi-C boundaries are shown with black boxes. *Med13l* promoter capture Hi-C (CapHi-C) reads are shown in bedgraph format at the top. The grey bar indicates the captured fragment, the black bars indicate connected fragments with the bar height displaying the number of unique reads ligated to the *Med13l* promoter fragment. All data are displayed on the UCSC Genome Browser (mm9).

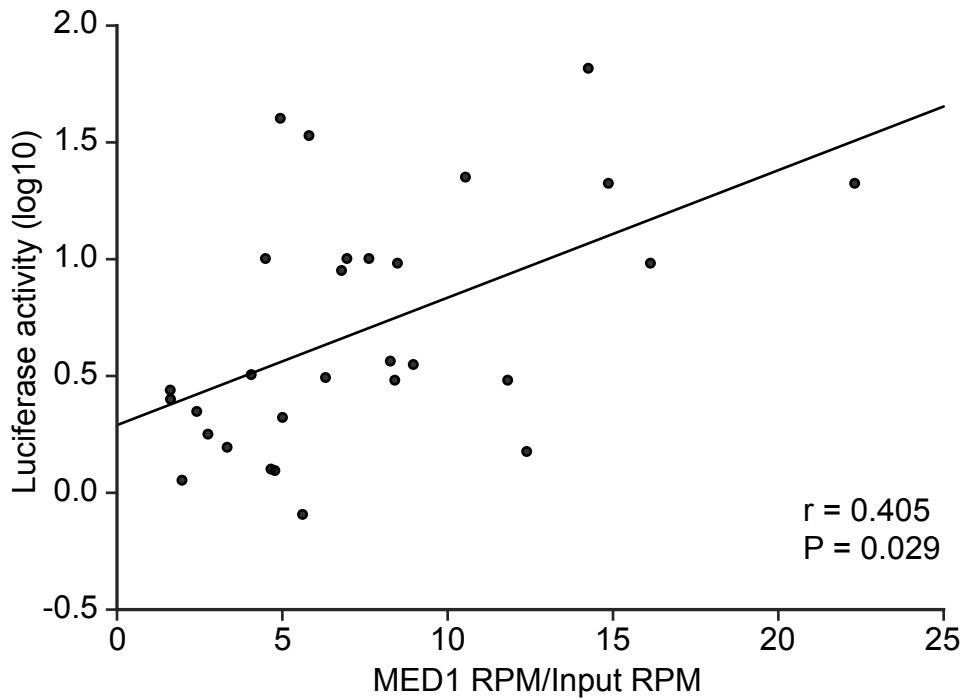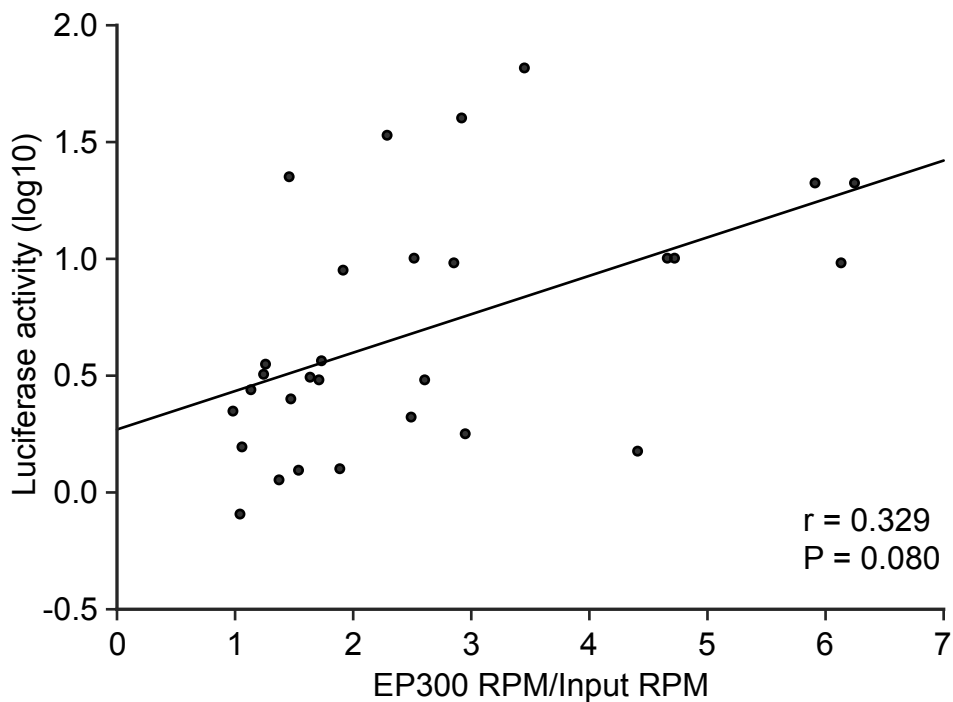

**Figure S7: Enhancer activity correlation to MED1 and EP300 ChIP-seq.** The significant correlation between enhancer activities in a luciferase reporter assay and the MED1 (top) or EP300 (bottom) ChIP-seq signal at these enhancer regions. Pearson correlation coefficient ( $r$ ) and significance level ( $P$ ) are shown. RPM = reads per million.



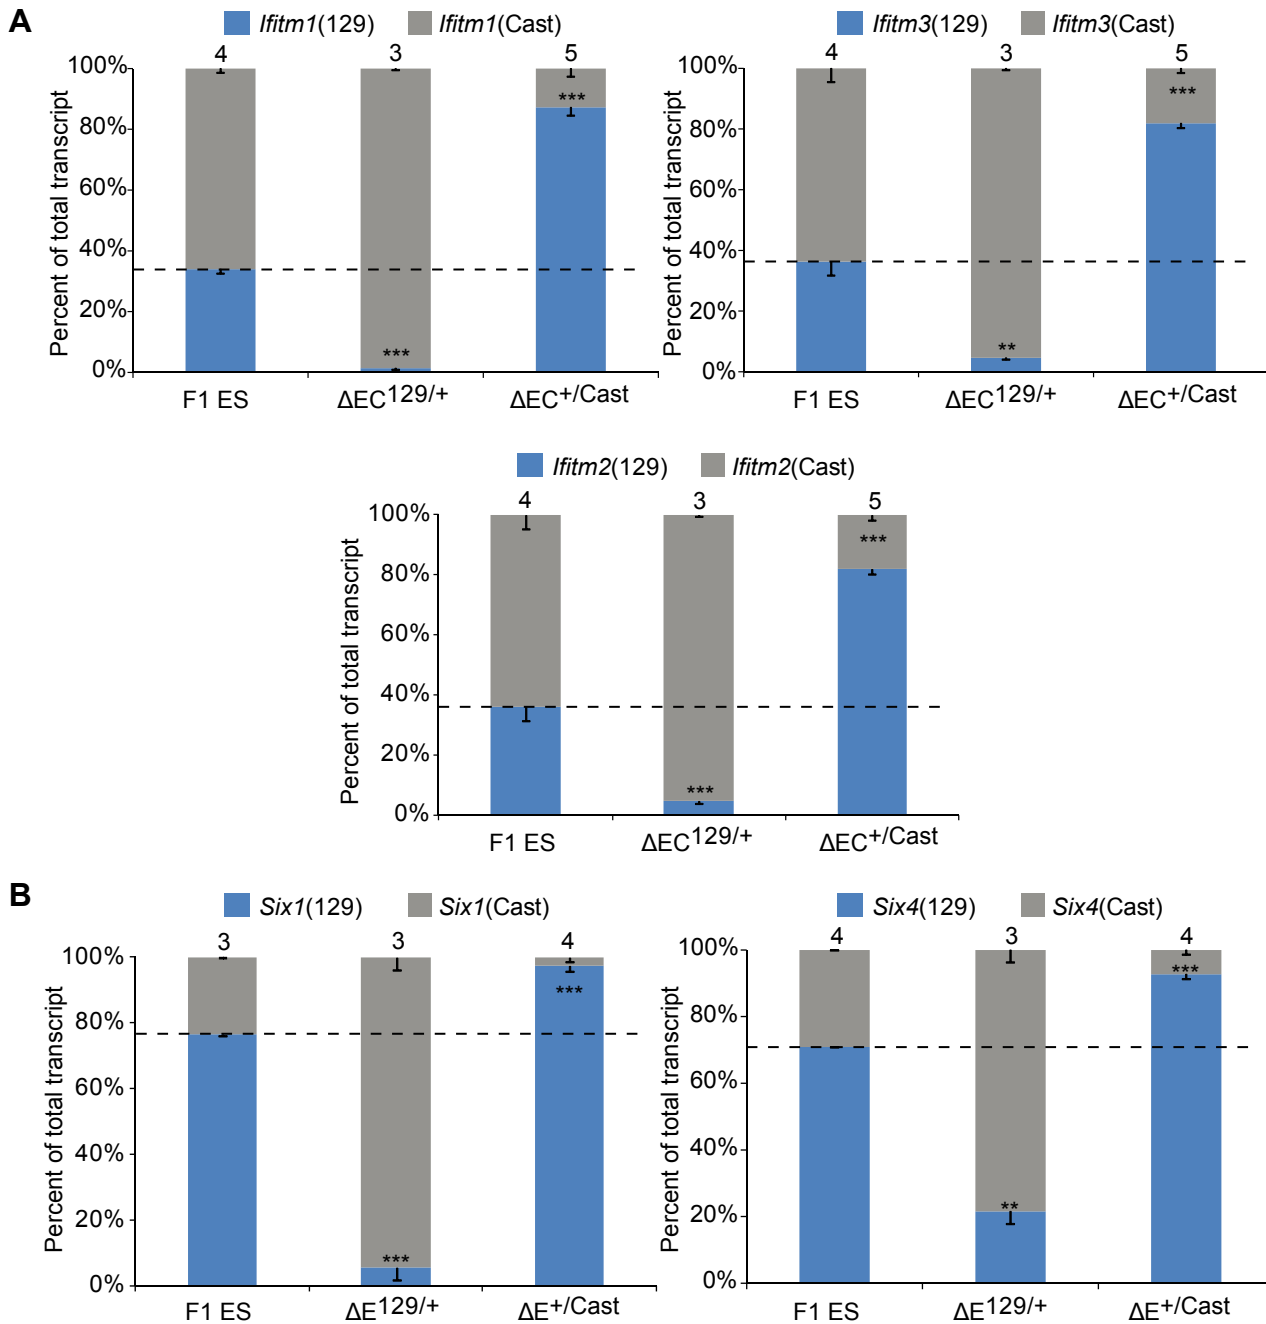

**Figure S8: Heterozygous deletion of enhancers at the *Ifitm* and *Six* loci cause reduced expression of the linked allele.** Gene expression changes after deletion of the enhancer region on one allele. The regions deleted are A) the *Ifitm* EC and B) the *Six* enhancer. Numbers above the bars indicate the number of deleted clones or cell isolates analyzed. Significant differences from F1 ES are indicated by \*\* P<0.01 and \*\*\* P<0.001.

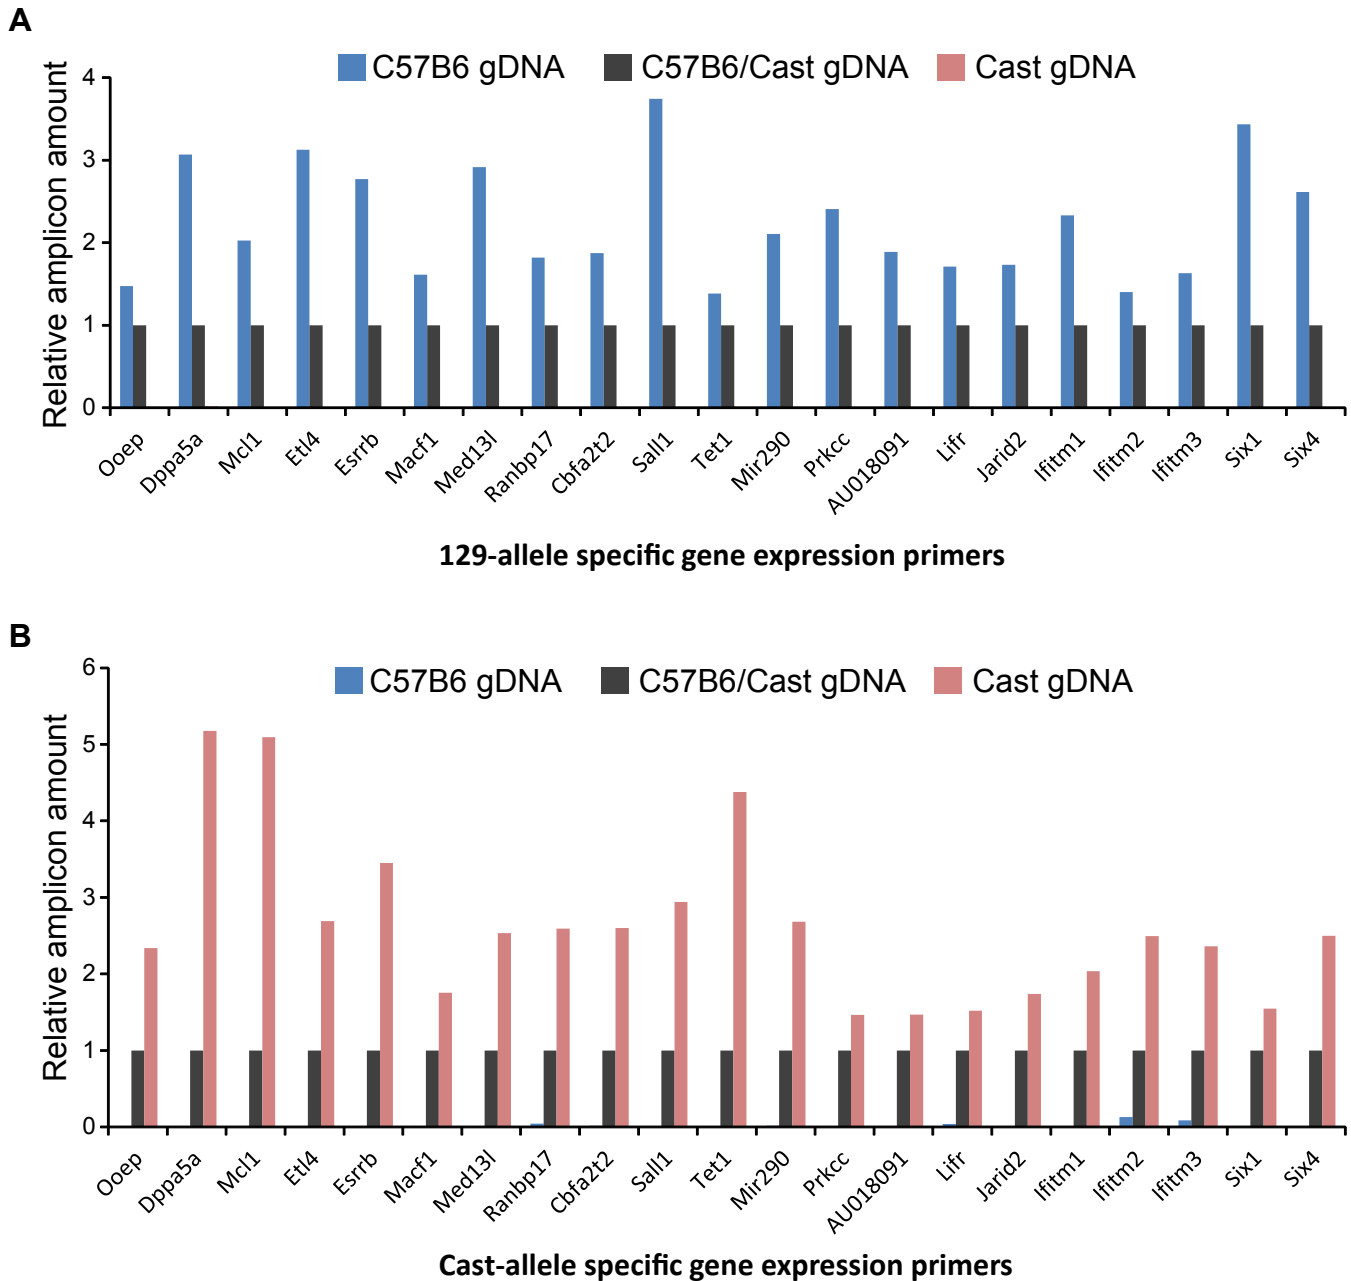

**Figure S9: Allele specific primer validation by realtime quantitative PCR.** Allele specific primers containing a SNP which distinguishes the 129-allele from the Cast-allele were confirmed by by qPCR to be highly allele specific. Relative amplicon amount for the 129-allele (A) and Cast-allele (B) specific primers tested on C57B6 (same genotype as 129 at these SNPs) and Cast genomic DNA as well as a 50:50 mixture of C57B6 and Cast genomic DNA. Values are normalized to the C57B6/Cast gDNA amount.
