# Supplementary material for: Enhancers and super-enhancers have an equivalent regulatory role in embryonic stem cells through regulation of single or multiple genes
Source: HighWire-hosted journal article supplement (doi:10.1101/gr.210930.116), 2016-11-28
Supplement: Supplemental_Table_S1.xlsx [file Supplemental_Table_S1.xlsx]

## Sheet: EC & SE
Probe	Chr	Start	End	size	No value	Feature	ENH/MTL3+
Chr3:34735001-34785000	3	34735001	34785000	49999	NaN	Sox2ot	5
Chr7:3180001-3235000	7	3180001	3235000	54999	NaN	Mir290	5
Chr9:78340001-78390000	9	78340001	78390000	49999	NaN	Dppa5a/Ooep	5
Chr1:136660001-136720000	1	136660001	136720000	59999	NaN	AC125186.1	4
Chr5:118415001-118465000	5	118415001	118465000	49999	NaN	Med13l	4
Chr10:62875001-62920000	10	62875001	62920000	44999	NaN	Tet1	4
Chr12:12765001-12810000	12	12765001	12810000	44999	NaN	Gm17337	4
Chr12:86475001-86525000	12	86475001	86525000	49999	NaN	Esrrb	4
Chr2:154405001-154450000	2	154405001	154450000	44999	NaN	Snta1/Cbfa2t2	3
Chr3:95630001-95675000	3	95630001	95675000	44999	NaN	Ensa/Mcl1	3
Chr3:133500001-133550000	3	133500001	133550000	49999	NaN	Tet2	3
Chr4:55455001-55500000	4	55455001	55500000	44999	NaN	Gm12510	3
Chr6:122745001-122790000	6	122745001	122790000	44999	NaN	Slc2a3	3
Chr8:72295001-72340000	8	72295001	72340000	44999	NaN	Gm10282	3
Chr8:88980001-89025000	8	88980001	89025000	44999	NaN	Sall1	3
Chr9:58255001-58300000	9	58255001	58300000	44999	NaN	Stoml1	3
Chr10:21805001-21850000	10	21805001	21850000	44999	NaN	SNORD23	3
Chr11:33510001-33555000	11	33510001	33555000	44999	NaN	Ranbp17	3
Chr14:99315001-99365000	14	99315001	99365000	49999	NaN	U2	3
Chr19:23065001-23110000	19	23065001	23110000	44999	NaN	2410080I02Rik	3
ChrX:52725001-52770000	X	52725001	52770000	44999	NaN	Mir363	3
Chr1:34050001-34095000	1	34050001	34095000	44999	NaN	Dst	2
Chr1:36040001-36075000	1	36040001	36075000	34999	NaN	Hs6st1	2
Chr1:36965001-37010000	1	36965001	37010000	44999	NaN	AC122872.1	2
Chr1:72205001-72235000	1	72205001	72235000	29999	NaN	Mreg	2
Chr1:118625001-118665000	1	118625001	118665000	39999	NaN	Tfcp2l1	2
Chr2:20645001-20680000	2	20645001	20680000	34999	NaN	Etl4	2
Chr2:71635001-71675000	2	71635001	71675000	39999	NaN	Gm1631	2
Chr3:34645001-34670000	3	34645001	34670000	24999	NaN	Sox2ot	2
Chr3:88555001-88595000	3	88555001	88595000	39999	NaN	Ubqln4	2
Chr3:135525001-135550000	3	135525001	135550000	24999	NaN	Manba	2
Chr4:98825001-98870000	4	98825001	98870000	44999	NaN	I0C0044D17Rik	2
Chr4:123610001-123645000	4	123610001	123645000	34999	NaN	Macf1	2
Chr4:141545001-141590000	4	141545001	141590000	44999	NaN	Fblim1	2
Chr4:142050001-142090000	4	142050001	142090000	39999	NaN	Tmem51	2
Chr4:148065001-148090000	4	148065001	148090000	24999	NaN	Gm13201	2
Chr5:116385001-116420000	5	116385001	116420000	34999	NaN	4930562A09Rik	2
Chr5:119560001-119585000	5	119560001	119585000	24999	NaN	Gm2301	2
Chr6:65000001-65045000	6	65000001	65045000	44999	NaN	Smarcad1	2
Chr6:67090001-67135000	6	67090001	67135000	44999	NaN	E230016M11Rik	2
Chr6:122320001-122365000	6	122320001	122365000	44999	NaN	Phc1	2
Chr6:125425001-125450000	6	125425001	125450000	24999	NaN	Cd9	2
Chr7:38005001-38050000	7	38005001	38050000	44999	NaN	C80913	2
Chr7:49325001-49370000	7	49325001	49370000	44999	NaN	Nav2	2
Chr7:112670001-112710000	7	112670001	112710000	39999	NaN	2310014F06Rik	2
Chr7:133090001-133135000	7	133090001	133135000	44999	NaN	Fgfr2	2
Chr8:36530001-36570000	8	36530001	36570000	39999	NaN	Dlc1	2
Chr9:110940001-110965000	9	110940001	110965000	24999	NaN	Tdgf1	2
Chr10:21080001-21115000	10	21080001	21115000	34999	NaN	Ahi1	2
Chr10:59950001-59980000	10	59950001	59980000	29999	NaN	Ddit4	2
Chr10:67080001-67105000	10	67080001	67105000	24999	NaN	Reep3	2
Chr11:8555001-8590000	11	8555001	8590000	34999	NaN	Tns3	2
Chr11:9095001-9140000	11	9095001	9140000	44999	NaN	Upp1	2
Chr11:12445001-12490000	11	12445001	12490000	44999	NaN	Cobl	2
Chr11:62490001-62520000	11	62490001	62520000	29999	NaN	Pigl	2
Chr11:117955001-117980000	11	117955001	117980000	24999	NaN	Socs3	2
Chr12:56275001-56320000	12	56275001	56320000	44999	NaN	7SK	2
Chr12:86880001-86905000	12	86880001	86905000	24999	NaN	6430527G18Rik	2
Chr13:63955001-63990000	13	63955001	63990000	34999	NaN	0610007P08Rik	2
Chr13:109610001-109635000	13	109610001	109635000	24999	NaN	Pde4d	2
Chr14:63480001-63525000	14	63480001	63525000	44999	NaN	Tdh	2
Chr14:76495001-76520000	14	76495001	76520000	24999	NaN	Tsc22d1	2
Chr14:105840001-105885000	14	105840001	105885000	44999	NaN	Spry2	2
Chr15:25740001-25765000	15	25740001	25765000	24999	NaN	Myo10	2
Chr16:8755001-8780000	16	8755001	8780000	24999	NaN	Usp7	2
Chr17:31785001-31830000	17	31785001	31830000	44999	NaN	Sik1	2
Chr17:36975001-37020000	17	36975001	37020000	44999	NaN	2410137M14Rik	2
Chr17:37060001-37100000	17	37060001	37100000	39999	NaN	Gabbr1	2
Chr18:38615001-38650000	18	38615001	38650000	34999	NaN	Arhgap26	2
Chr19:5825001-5870000	19	5825001	5870000	44999	NaN	Neat1	2
Chr2:163030001-163055000	2	163030001	163055000	24999	NaN	Ift52	2
Chr18:75340001-75365000	18	75340001	75365000	24999	NaN	Gm20544	2

## Sheet: EC no SE
Probe	Chr	Start	End	size	No value	Feature	ENH/MTL3+
Chr1:77435001-77480000	1	77435001	77480000	44999	NaN	Epha4	3
Chr3:103125001-103170000	3	103125001	103170000	44999	NaN	Dennd2c	3
Chr11:80115001-80160000	11	80115001	80160000	44999	NaN	Atad5	3
Chr13:44700001-44745000	13	44700001	44745000	44999	NaN	Jarid2	3
Chr1:186490001-186515000	1	186490001	186515000	24999	NaN	Tgfb2	2
Chr2:20475001-20510000	2	20475001	20510000	34999	NaN	Etl4	2
Chr2:58605001-58630000	2	58605001	58630000	24999	NaN	Upp2	2
Chr2:71845001-71890000	2	71845001	71890000	44999	NaN	Itga6	2
Chr2:149960001-150005000	2	149960001	150005000	44999	NaN	Tmem90b	2
Chr2:165960001-165990000	2	165960001	165990000	29999	NaN	Gm11463	2
Chr2:181895001-181920000	2	181895001	181920000	24999	NaN	Polr3k	2
Chr4:83310001-83355000	4	83310001	83355000	44999	NaN	Ttc39b	2
Chr4:99620001-99660000	4	99620001	99660000	39999	NaN	Gm12688	2
Chr4:135560001-135605000	4	135560001	135605000	44999	NaN	Grhl3	2
Chr5:22550001-22595000	5	22550001	22595000	44999	NaN	Orc5	2
Chr5:97205001-97240000	5	97205001	97240000	34999	NaN	Paqr3	2
Chr5:103715001-103750000	5	103715001	103750000	34999	NaN	Aff1	2
Chr6:52085001-52130000	6	52085001	52130000	44999	NaN	Gm15055	2
Chr6:65775001-65820000	6	65775001	65820000	44999	NaN	Gm16838	2
Chr6:72770001-72810000	6	72770001	72810000	39999	NaN	Tcf7l1	2
Chr7:80725001-80770000	7	80725001	80770000	44999	NaN	Iqgap1	2
Chr7:97780001-97825000	7	97780001	97825000	44999	NaN	Pak1	2
Chr7:107325001-107365000	7	107325001	107365000	39999	NaN	AC127431.1	2
Chr7:140940001-140965000	7	140940001	140965000	24999	NaN	Athl1	2
Chr8:3390001-3420000	8	3390001	3420000	29999	NaN	A430078G23Rik	2
Chr8:27220001-27260000	8	27220001	27260000	39999	NaN	Adrb3	2
Chr8:111630001-111670000	8	111630001	111670000	39999	NaN	Ldhd	2
Chr8:111765001-111790000	8	111765001	111790000	24999	NaN	Cfdp1	2
Chr9:18700001-18745000	9	18700001	18745000	44999	NaN	Olfr24	2
Chr10:17555001-17600000	10	17555001	17600000	44999	NaN	Cited2	2
Chr10:18400001-18440000	10	18400001	18440000	39999	NaN	Nhsl1	2
Chr10:27990001-28020000	10	27990001	28020000	29999	NaN	Gm10145	2
Chr11:30730001-30770000	11	30730001	30770000	39999	NaN	Gm12100	2
Chr11:44745001-44770000	11	44745001	44770000	24999	NaN	Ebf1	2
Chr11:55935001-55970000	11	55935001	55970000	34999	NaN	Gm12239	2
Chr11:77655001-77695000	11	77655001	77695000	39999	NaN	SNORA17	2
Chr12:54155001-54190000	12	54155001	54190000	34999	NaN	Egln3	2
Chr14:122245001-122280000	14	122245001	122280000	34999	NaN	Clybl	2
Chr14:122410001-122435000	14	122410001	122435000	24999	NaN	Gm5089	2
Chr15:7095001-7140000	15	7095001	7140000	44999	NaN	Lifr	2
Chr17:45585001-45610000	17	45585001	45610000	24999	NaN	Slc29a1	2
Chr18:47470001-47500000	18	47470001	47500000	29999	NaN	Sema6a	2
Chr18:65905001-65945000	18	65905001	65945000	39999	NaN	U7	2
Chr19:44260001-44290000	19	44260001	44290000	29999	NaN	AC123853.1	2
Chr19:55535001-55560000	19	55535001	55560000	24999	NaN	Vti1a	2
ChrX:58020001-58045000	X	58020001	58045000	24999	NaN	Zic3	2
