# Supplementary material for: Enhancers and super-enhancers have an equivalent regulatory role in embryonic stem cells through regulation of single or multiple genes
Source: HighWire-hosted journal article supplement (doi:10.1101/gr.210930.116), 2016-11-28
Supplement: Supplemental_Table_S3.xlsx [file Supplemental_Table_S3.xlsx]

## Sheet: MTL outside SE
Chromosome	Start	End	H3K27ac
2	52071483	52073483	31.5773
7	73617240	73619240	29.2834
6	148991550	148993550	27.7623
1	178336992	178338992	26.316
10	95414647	95416647	26.0428
13	23741174	23743174	25.7401
11	96006186	96008186	25.1018
X	13046423	13048423	24.3034
1	86525427	86527427	24.0614
13	44704609	44706609	23.9007
15	7115916	7117916	23.4301
2	180708020	180710020	23.402
X	144337083	144339083	22.8994
11	69580778	69582778	22.6285
9	106170849	106172849	22.4062
1	52952546	52954546	22.2165
13	80884959	80886959	21.917
5	135933868	135935868	21.8655
10	68136547	68138547	21.334
X	162831295	162833295	21.3334
2	153345807	153347807	21.2237
9	114583570	114585570	21.1761
18	36414686	36416686	21.0228
13	23738549	23740549	20.9988
6	136469847	136471847	20.8887
19	5489691	5491691	20.8275
6	72786773	72788773	20.8265
1	86310190	86312190	20.7698
2	129799304	129801304	20.7453
12	109947527	109949527	20.5608
3	65658107	65660107	20.3719
1	127773047	127775047	20.3519
X	103310924	103312924	20.1847
1	153375655	153377655	19.9731
19	17137068	17139068	19.8832
19	14834733	14836733	19.5837
18	30120795	30122795	19.3538
10	19207278	19209278	19.3181
19	4809529	4811529	19.2959
19	5802546	5804546	19.1853
18	77037227	77039227	19.1756
16	23106602	23108602	19.1248
10	120170501	120172501	18.8727
12	39997063	39999063	18.8168
3	34034906	34036906	18.7067
2	165809127	165811127	18.5353
7	107236004	107238004	18.45
10	68135834	68137834	18.4222
3	97158391	97160391	18.4122
1	12743721	12745721	18.179
3	14998866	15000866	18.0115
10	116561328	116563328	17.8391
10	108286039	108288039	17.813
6	82772329	82774329	17.7552
12	73085201	73087201	17.7289
5	53670674	53672674	17.7031
1	60850107	60852107	17.6443
1	86308514	86310514	17.6167
12	51347076	51349076	17.6093
1	86486615	86488615	17.5913
5	50122195	50124195	17.5202
5	145230490	145232490	17.2333
5	25553875	25555875	17.2032
10	67002100	67004100	17.203
8	43306144	43308144	17.1862
9	40239277	40241277	17.1011
2	168954863	168956863	17.0712
19	46044508	46046508	17.0305
7	6257590	6259590	16.9574
4	84661447	84663447	16.8949
16	22401774	22403774	16.7298
17	13658058	13660058	16.6325
5	28209025	28211025	16.604
18	84933484	84935484	16.5744
X	101395708	101397708	16.5571
2	31571258	31573258	16.5456
5	103723691	103725691	16.5369
4	141290664	141292664	16.5198
18	35822021	35824021	16.4793
19	3841695	3843695	16.4662
11	102406691	102408691	16.4583
5	8423362	8425362	16.4097
6	100377208	100379208	16.4005
15	50899686	50901686	16.238
14	19749825	19751825	16.236
18	69781320	69783320	16.1056
8	68419544	68421544	16.0217
17	46811602	46813602	16.0119
1	87225538	87227538	15.9727
11	60175912	60177912	15.9272
11	120349435	120351435	15.781
10	61415302	61417302	15.6868
1	119048220	119050220	15.6352
8	106934605	106936605	15.6333
3	88509047	88511047	15.616
17	80800352	80802352	15.5273
13	63271723	63273723	15.5116
17	79341968	79343968	15.5077
3	22155608	22157608	15.4646
4	83328886	83330886	15.4485
4	53338823	53340823	15.4032
5	108076143	108078143	15.3557
18	57877021	57879021	15.3411
17	29007017	29009017	15.3282
2	29819608	29821608	15.2927
11	6894286	6896286	15.2783
12	4897190	4899190	15.2725
4	133899684	133901684	15.1229
8	72333361	72335361	15.1127
17	87973050	87975050	14.9911
6	136489152	136491152	14.9864
16	42780976	42782976	14.9751
2	154612714	154614714	14.8982
19	32254422	32256422	14.8515
1	133693523	133695523	14.7764
11	20230159	20232159	14.7196
7	140958557	140960557	14.7173
4	54986466	54988466	14.6868
10	3940417	3942417	14.6549
16	22410920	22412920	14.6014
19	29007270	29009270	14.5189
1	132200099	132202099	14.4292
15	62958122	62960122	14.4167
19	38063383	38065383	14.4059
8	86887232	86889232	14.3591
13	113793169	113795169	14.3342
1	77453030	77455030	14.3196
14	45444466	45446466	14.3194
18	17418033	17420033	14.2742
5	110468565	110470565	14.2611
1	132470245	132472245	14.238
X	151123124	151125124	14.2066
9	102689357	102691357	14.1791
15	93397159	93399159	14.0752
10	52273144	52275144	14.0718
4	134467495	134469495	14.0712
13	112461633	112463633	14.0294
9	108566360	108568360	14.0167
5	117395818	117397818	13.9836
16	9132005	9134005	13.8925
11	100938533	100940533	13.8867
19	7582568	7584568	13.8657
1	64731881	64733881	13.8543
X	13460872	13462872	13.8275
11	88689301	88691301	13.7579
1	17249898	17251898	13.656
2	165980604	165982604	13.6392
9	58455010	58457010	13.6057
3	104814531	104816531	13.5986
7	3346952	3348952	13.5957
5	18687651	18689651	13.5937
13	112769758	112771758	13.5803
6	149130346	149132346	13.5482
5	127687891	127689891	13.4724
8	14013910	14015910	13.4602
13	40868062	40870062	13.4313
17	47570816	47572816	13.4289
15	52012264	52014264	13.3924
17	10431869	10433869	13.3556
11	100375142	100377142	13.2749
7	44374485	44376485	13.2744
15	76668765	76670765	13.2611
X	12839284	12841284	13.2081
2	80638152	80640152	13.2009
1	13659694	13661694	13.1854
4	106858711	106860711	13.1786
10	84553675	84555675	13.1675
13	94705768	94707768	13.1408
10	117952275	117954275	13.1293
11	63270204	63272204	13.1224
5	110436893	110438893	13.0874
1	131889367	131891367	13.0058
8	116673124	116675124	12.9849
14	121505448	121507448	12.9767
3	137832590	137834590	12.9528
9	37656369	37658369	12.9415
10	4289152	4291152	12.9412
17	13682822	13684822	12.9365
12	76964265	76966265	12.9359
7	70788279	70790279	12.8799
10	30736498	30738498	12.8754
6	112949437	112951437	12.82
7	145138265	145140265	12.8029
17	33599145	33601145	12.7958
9	21767717	21769717	12.7878
9	40782961	40784961	12.7853
10	95891370	95893370	12.7709
8	44978477	44980477	12.7601
2	31162854	31164854	12.6895
17	85161849	85163849	12.6828
8	57731992	57733992	12.6056
5	92111597	92113597	12.5822
5	142667513	142669513	12.561
13	55246490	55248490	12.5262
11	8634703	8636703	12.4979
18	5010992	5012992	12.4374
3	103145480	103147480	12.3007
11	3292035	3294035	12.2109
13	44721343	44723343	12.1929
18	13711786	13713786	12.1891
5	86406462	86408462	12.1456
5	137348912	137350912	12.1339
1	134534403	134536403	12.0683
9	32094658	32096658	12.067
5	22573343	22575343	12.0532
6	140602665	140604665	12.0226
10	21745251	21747251	12.0111
1	87229790	87231790	12.0099
17	45600857	45602857	12.0038
9	8462054	8464054	11.9998
2	180726845	180728845	11.9112
2	90846072	90848072	11.8898
15	99703830	99705830	11.7833
19	27903835	27905835	11.7792
2	71865764	71867764	11.713
5	110803181	110805181	11.6793
5	104433181	104435181	11.6719
5	131490123	131492123	11.6574
2	149982328	149984328	11.6123
2	168114220	168116220	11.585
10	61928299	61930299	11.5702
18	33834988	33836988	11.5159
5	30154367	30156367	11.5103
13	110018388	110020388	11.5001
11	26102923	26104923	11.4856
1	59375483	59377483	11.461
5	100043019	100045019	11.4513
12	102729514	102731514	11.4467
14	99038484	99040484	11.4377
17	15247082	15249082	11.4318
10	34233135	34235135	11.4265
19	23151381	23153381	11.3931
2	172515766	172517766	11.334
4	133121419	133123419	11.3124
2	122369457	122371457	11.3043
11	29713295	29715295	11.2897
4	57919485	57921485	11.2829
15	41881774	41883774	11.2824
6	55791064	55793064	11.2736
10	40362231	40364231	11.2365
3	30723466	30725466	11.2359
2	92143135	92145135	11.2329
2	172576373	172578373	11.2236
10	118460316	118462316	11.1994
7	16780191	16782191	11.1365
3	84180716	84182716	11.0991
16	64884334	64886334	11.0917
1	62766747	62768747	11.0762
4	10931488	10933488	11.0726
4	137469402	137471402	11.0689
8	40962312	40964312	11.0406
11	49805406	49807406	11.0266
11	4805284	4807284	11.0102
2	102120670	102122670	10.989
9	45348396	45350396	10.9694
7	96204031	96206031	10.919
4	57689980	57691980	10.8631
3	144412201	144414201	10.8229
1	54484033	54486033	10.7736
1	152914745	152916745	10.709
5	97202902	97204902	10.6833
5	43868241	43870241	10.6118
1	72241804	72243804	10.5653
6	54095697	54097697	10.522
4	57841105	57843105	10.5161
5	128599785	128601785	10.4648
10	12607916	12609916	10.4082
1	71645158	71647158	10.4024
12	41729059	41731059	10.3401
16	9082764	9084764	10.2819
2	70277894	70279894	10.2633
4	119025745	119027745	10.2492
15	10722746	10724746	10.1912
4	118740404	118742404	10.1703
2	131846770	131848770	10.1669
1	140428449	140430449	10.1642
14	122467137	122469137	10.1547
2	166193519	166195519	10.1133
3	68564160	68566160	10.0931
2	75873165	75875165	10.0809
2	148874075	148876075	10.048
8	27239760	27241760	10.0346
2	132577304	132579304	10.0095
18	80183858	80185858	10.0072
5	92497419	92499419	9.98795
16	32291031	32293031	9.97571
10	61314776	61316776	9.973
17	84350473	84352473	9.94243
11	95979974	95981974	9.93925
7	130263841	130265841	9.91488
12	80115853	80117853	9.91053
2	20594257	20596257	9.90915
13	51845252	51847252	9.84463
9	113457690	113459690	9.83471
12	86930570	86932570	9.82578
3	34667639	34669639	9.78129
19	7260740	7262740	9.77159
10	59557575	59559575	9.69705
11	120662841	120664841	9.68722
13	38108305	38110305	9.6769
2	20495422	20497422	9.67353
2	167071479	167073479	9.65804
2	146833482	146835482	9.62033
12	4556155	4558155	9.56852
11	74648311	74650311	9.50659
1	36067116	36069116	9.48609
4	10398819	10400819	9.4703
5	12872096	12874096	9.40873
16	31947427	31949427	9.39653
10	56373371	56375371	9.3704
10	100065231	100067231	9.27564
18	81196468	81198468	9.25763
11	57969854	57971854	9.24494
14	8402494	8404494	9.20381
10	41466492	41468492	9.15905
5	37245507	37247507	9.13569
9	114639190	114641190	9.13369
7	37474670	37476670	9.13298
4	108218094	108220094	9.1229
12	71296162	71298162	9.0849
8	106962435	106964435	8.98889
11	5740359	5742359	8.971
8	107594116	107596116	8.95436
4	127344234	127346234	8.92877
14	50869657	50871657	8.92651
13	106855753	106857753	8.87
7	28378428	28380428	8.86249
10	126971024	126973024	8.85407
17	88510189	88512189	8.82956
2	153167280	153169280	8.80588
16	88719217	88721217	8.78435
18	24867843	24869843	8.77695
1	133396946	133398946	8.75276
5	4302832	4304832	8.6906
9	108391843	108393843	8.6698
7	65872634	65874634	8.66129
2	144714369	144716369	8.6332
7	25263221	25265221	8.60025
13	56142403	56144403	8.58999
1	20866636	20868636	8.52736
5	134332066	134334066	8.50719
8	27235391	27237391	8.49805
4	105223195	105225195	8.4851
6	144453464	144455464	8.44589
10	128186353	128188353	8.40439
11	107351845	107353845	8.39924
5	72901448	72903448	8.38426
13	54215004	54217004	8.37662
2	30134338	30136338	8.34978
5	110226781	110228781	8.3326
11	22829263	22831263	8.31397
6	92494642	92496642	8.23543
2	170771364	170773364	8.21065
17	37989678	37991678	8.19228
13	6646347	6648347	8.18253
5	122452331	122454331	8.16705
19	4896128	4898128	8.11493
13	34108883	34110883	8.10401
11	11880747	11882747	8.08338
7	24516316	24518316	8.00226
19	55490918	55492918	7.98589
2	119236166	119238166	7.9774
5	129269205	129271205	7.97032
6	133962435	133964435	7.97025
6	125591014	125593014	7.9014
7	116285638	116287638	7.83267
11	76286509	76288509	7.8129
3	52253254	52255254	7.78401
8	111764767	111766767	7.74771
14	78288100	78290100	7.72862
12	51520871	51522871	7.7233
16	59544573	59546573	7.6887
13	47854828	47856828	7.68254
10	84909959	84911959	7.67655
1	154079993	154081993	7.67022
19	21817217	21819217	7.64114
7	30265168	30267168	7.61613
18	38903080	38905080	7.59799
18	75464049	75466049	7.58499
19	44048435	44050435	7.57879
9	118862757	118864757	7.56054
2	21392027	21394027	7.49463
4	86182813	86184813	7.46018
16	76320857	76322857	7.44604
9	14173124	14175124	7.39478
15	77846955	77848955	7.39279
19	53022222	53024222	7.39047
1	59422528	59424528	7.34273
4	99635182	99637182	7.30916
2	4574321	4576321	7.29377
12	106174667	106176667	7.28606
14	64407171	64409171	7.2809
15	67070164	67072164	7.25303
19	28181922	28183922	7.14665
9	7633134	7635134	7.12815
13	53460521	53462521	7.12289
3	52400192	52402192	7.12098
16	42305102	42307102	7.09323
6	25032281	25034281	7.08596
3	54989250	54991250	7.04854
17	45606311	45608311	7.03218
6	97147987	97149987	6.98628
16	73095916	73097916	6.94774
11	76319058	76321058	6.94391
9	99419303	99421303	6.89898
4	148737810	148739810	6.86248
1	135216702	135218702	6.83383
6	5118339	5120339	6.81475
1	128391599	128393599	6.79042
1	42057687	42059687	6.77456
19	46523911	46525911	6.75703
19	21893993	21895993	6.75233
7	25668217	25670217	6.74598
3	101162621	101164621	6.73155
4	117372923	117374923	6.71888
7	34569843	34571843	6.70475
18	6274666	6276666	6.69006
2	155381018	155383018	6.68522
8	71590858	71592858	6.6222
8	125699648	125701648	6.60905
2	129797578	129799578	6.59928
5	100466591	100468591	6.59735
17	47712243	47714243	6.58856
8	84914583	84916583	6.5863
1	86187031	86189031	6.57419
19	47449798	47451798	6.57118
4	57780012	57782012	6.50563
2	20933612	20935612	6.47455
5	103734711	103736711	6.45506
15	43529000	43531000	6.42546
8	61590280	61592280	6.41465
16	32876622	32878622	6.41315
2	40910076	40912076	6.39122
2	38667913	38669913	6.37502
11	4301251	4303251	6.35635
2	60049852	60051852	6.3556
10	8888484	8890484	6.33458
17	79363966	79365966	6.31529
3	108432657	108434657	6.28946
3	18623094	18625094	6.27934
17	45474010	45476010	6.27063
18	5162348	5164348	6.27063
19	10266079	10268079	6.26128
7	34668553	34670553	6.23802
1	153423945	153425945	6.23511
5	88678843	88680843	6.22924
4	117151896	117153896	6.22519
6	87912728	87914728	6.22276
6	92245524	92247524	6.22035
5	101847096	101849096	6.13496
8	46445104	46447104	6.13348
2	132700914	132702914	6.12335
15	100473312	100475312	6.07373
8	95832640	95834640	6.02402
1	62180882	62182882	6.0234
18	37770648	37772648	6.02275
15	80011870	80013870	5.99399
1	176643542	176645542	5.96946
10	61830627	61832627	5.93908
X	58013317	58015317	5.9335
8	78067364	78069364	5.90567
5	138990726	138992726	5.90214
10	95882873	95884873	5.90021
4	137047672	137049672	5.84859
1	71672571	71674571	5.81934
1	140244709	140246709	5.78258
11	119937123	119939123	5.77739
10	93241400	93243400	5.75665
9	49750629	49752629	5.74917
11	77737717	77739717	5.74705
14	76387128	76389128	5.70395
4	136316755	136318755	5.70319
14	48700231	48702231	5.69476
18	75900656	75902656	5.66393
11	68393161	68395161	5.62779
13	53234056	53236056	5.60947
19	42321626	42323626	5.56892
7	134021351	134023351	5.53991
15	88836533	88838533	5.52874
4	136145950	136147950	5.52654
14	49446927	49448927	5.46091
4	33823036	33825036	5.44399
13	74398468	74400468	5.39971
1	182162176	182164176	5.39384
6	127335869	127337869	5.39193
6	97101506	97103506	5.35445
3	147180859	147182859	5.33554
14	9318113	9320113	5.30592
6	125503805	125505805	5.30056
8	86774716	86776716	5.27186
17	45494570	45496570	5.27097
12	117683265	117685265	5.17687
11	116970019	116972019	5.17005
10	88684142	88686142	5.15403
19	37876930	37878930	5.13563
12	79851093	79853093	5.13274
2	5356087	5358087	5.12331
16	96844923	96846923	5.09931
11	118007114	118009114	5.08156
10	18422134	18424134	5.08146
19	6921075	6923075	5.07297
11	47639743	47641743	5.05831
1	72204351	72206351	5.02564
3	53649451	53651451	4.92554
X	48063338	48065338	4.91165
6	101978383	101980383	4.89706
18	35756741	35758741	4.89526
7	130251291	130253291	4.89064
5	114570714	114572714	4.87716
17	63812991	63814991	4.84782
6	144360511	144362511	4.84584
17	28593013	28595013	4.8356
5	101712486	101714486	4.83286
5	136101258	136103258	4.81552
2	30778372	30780372	4.78034
3	138814348	138816348	4.67658
2	130696800	130698800	4.67405
5	75084328	75086328	4.64996
18	54718404	54720404	4.61837
10	95595009	95597009	4.60122
14	24252928	24254928	4.53182
5	72464104	72466104	4.38456
1	74110638	74112638	4.37721
1	6457200	6459200	4.37336
5	119309411	119311411	4.36718
5	35770321	35772321	4.34743
11	76350519	76352519	4.34524
1	74824014	74826014	4.34067
15	59391091	59393091	4.33525
16	38470948	38472948	4.32821
10	79840051	79842051	4.3225
9	107629760	107631760	4.3071
3	103085182	103087182	4.28419
9	88063499	88065499	4.26937
5	21825685	21827685	4.26899
12	87288361	87290361	4.25755
2	25179716	25181716	4.23677
18	75209515	75211515	4.21162
8	83775835	83777835	4.19509
5	142799853	142801853	4.10301
18	69924566	69926566	4.02435
9	49795732	49797732	4.01602
7	134770601	134772601	3.93247
18	55189383	55191383	3.88906
6	4676662	4678662	3.88587
3	51127719	51129719	3.84449
9	71762526	71764526	3.83741
15	52967001	52969001	3.79722
4	129749590	129751590	3.79335
13	97206633	97208633	3.74294
9	54097778	54099778	3.66128
6	115650048	115652048	3.66082
10	41996908	41998908	3.5885
11	50390443	50392443	3.58399
11	44745941	44747941	3.56663
2	146630208	146632208	3.55767
1	57469483	57471483	3.51877
17	9201742	9203742	3.51686
9	15022291	15024291	3.50827
9	22130567	22132567	3.48904
4	138793560	138795560	3.46037
1	186509710	186511710	3.43791
2	119789216	119791216	3.39559
3	152164696	152166696	3.38069
4	117483846	117485846	3.36176
7	73398568	73400568	3.34343
8	12544770	12546770	3.32576
2	168213296	168215296	3.31749
9	102999570	103001570	3.26434
10	85450800	85452800	3.25724
11	34112033	34114033	3.2191
1	192514552	192516552	3.17368
6	4737900	4739900	3.06018
1	189760663	189762663	3.02929
14	77249889	77251889	3.02486
3	153675043	153677043	2.98745
6	145175571	145177571	2.98491
6	7752112	7754112	2.96675
16	59564840	59566840	2.95726
2	31245395	31247395	2.94865
8	89156190	89158190	2.9426
11	84276092	84278092	2.91933
7	96654479	96656479	2.91569
15	76306366	76308366	2.89414
5	75517342	75519342	2.89351
13	40850980	40852980	2.78133
15	59822943	59824943	2.77036
2	160110477	160112477	2.68662
2	28606541	28608541	2.66998
17	44471742	44473742	2.6582
4	141425063	141427063	2.65607
9	45501341	45503341	2.65454
1	133083312	133085312	2.64542
1	132287410	132289410	2.61201
8	8483823	8485823	2.50173
1	157457853	157459853	2.48747
8	88626979	88628979	2.47956
5	116452507	116454507	2.40691
11	96189329	96191329	2.38262
9	49653025	49655025	2.36818
3	9243267	9245267	2.33106
4	129969364	129971364	2.31145
12	56519310	56521310	2.30488
9	88331750	88333750	2.2731
2	72514857	72516857	2.26439
X	51683787	51685787	2.16167
5	24598032	24600032	2.12811
1	156982662	156984662	2.07563
19	42384181	42386181	2.04242
7	144887969	144889969	2.02103
X	60771672	60773672	1.99933
2	13696699	13698699	1.93447
11	111843253	111845253	1.86437
19	45142760	45144760	1.85797
15	65748769	65750769	1.82147
5	119054654	119056654	1.72489
11	63923574	63925574	1.65337
5	129216694	129218694	1.58951
17	14692564	14694564	1.5483
11	3192225	3194225	1.48544
5	113663773	113665773	1.46467
4	115831130	115833130	1.44776
12	112875317	112877317	1.32339
4	143227205	143229205	1.18026

## Sheet: MTL inside SE
Chromosome	Start	End	K27ac
5	123137547	123139547	30.0073
3	34755750	34757750	26.2849
10	67095174	67097174	26.008
6	122340047	122342047	25.5323
6	65020995	65022995	24.6308
10	80050295	80052295	22.1116
3	34757030	34759030	22.0985
6	122341285	122343285	21.952
6	122764073	122766073	21.5546
5	33534622	33536622	21.2734
4	55476812	55478812	21.1065
9	110946679	110948679	20.9588
4	55474528	55476528	20.8135
6	65023867	65025867	20.6338
7	3200385	3202385	20.6154
7	3211373	3213373	20.5851
17	70827529	70829529	20.4511
7	3205869	3207869	20.449
11	62510368	62512368	20.2721
14	99339108	99341108	20.1527
3	103207020	103209020	20.1303
4	130519202	130521202	20.0892
1	36986706	36988706	19.9306
2	154425592	154427592	19.8101
17	35503055	35505055	19.7182
6	122701777	122703777	19.5388
5	123134349	123136349	19.5331
2	154427053	154429053	18.9807
11	97661257	97663257	18.9535
2	152176486	152178486	18.8615
7	13013495	13015495	18.8518
19	23132446	23134446	18.5998
1	36013172	36015172	18.1589
1	180887918	180889918	18.1299
12	86500815	86502815	18.0296
12	86497877	86499877	17.8829
4	119070960	119072960	17.8311
7	80014366	80016366	17.5497
10	62892047	62894047	17.5366
17	66479140	66481140	17.5328
10	85538840	85540840	17.4991
3	135545643	135547643	17.4409
15	97592891	97594891	17.3432
17	29450382	29452382	17.2677
12	55504547	55506547	17.168
13	95533383	95535383	17.0558
15	77354494	77356494	16.79
6	122765476	122767476	16.7744
7	45550663	45552663	16.7485
2	154422707	154424707	16.7324
4	142070035	142072035	16.7151
3	9641136	9643136	16.7106
7	133114235	133116235	16.6588
7	63956120	63958120	16.6552
11	69703226	69705226	16.6387
5	118435689	118437689	16.5261
12	86503662	86505662	16.5073
3	88570943	88572943	16.406
6	83892817	83894817	16.3532
7	80129606	80131606	16.325
1	36985051	36987051	16.2691
8	89014830	89016830	16.2663
2	20654213	20656213	16.2138
1	182029345	182031345	16.1805
3	34760362	34762362	16.1721
9	58278724	58280724	16.1086
11	33536793	33538793	16.0762
8	89002855	89004855	16.0478
8	36548278	36550278	15.9002
15	88708085	88710085	15.6833
2	163030782	163032782	15.6766
1	166124324	166126324	15.6591
16	84768403	84770403	15.6467
2	166156351	166158351	15.6409
4	123623630	123625630	15.6316
10	62894654	62896654	15.5293
7	112690476	112692476	15.43
17	31807261	31809261	15.3282
4	141569257	141571257	15.2503
6	39445174	39447174	15.1849
4	141564566	141566566	15.1791
17	36994639	36996639	15.1771
8	33915337	33917337	15.1339
14	21485288	21487288	15.0358
14	105858679	105860679	14.9522
4	123624512	123626512	14.903
1	84859898	84861898	14.8064
3	135546506	135548506	14.7528
4	130639284	130641284	14.7499
11	9115065	9117065	14.6274
11	9116134	9118134	14.5815
12	12942483	12944483	14.5336
8	43319979	43321979	14.4288
11	67010806	67012806	14.3391
X	8007709	8009709	14.2002
2	163051345	163053345	14.184
5	64863913	64865913	14.1354
12	12787421	12789421	13.9067
6	125432832	125434832	13.7413
1	118647219	118649219	13.7196
8	84649359	84651359	13.6157
1	72213163	72215163	13.6098
1	180923978	180925978	13.5975
2	32173514	32175514	13.5864
14	48653891	48655891	13.5847
2	32161604	32163604	13.5359
11	8574900	8576900	13.2786
6	67110784	67112784	13.2562
1	136695231	136697231	13.048
1	36060065	36062065	13.0151
1	136952826	136954826	12.993
7	112687716	112689716	12.9586
17	36996574	36998574	12.9441
10	44390980	44392980	12.8996
4	137596396	137598396	12.8633
19	23075040	23077040	12.7532
1	119074942	119076942	12.7418
7	139944735	139946735	12.5356
17	70864197	70866197	12.4503
3	96674812	96676812	12.4137
8	90827513	90829513	12.1967
10	21987563	21989563	11.9377
6	91709652	91711652	11.8812
2	33438918	33440918	11.8673
11	8568570	8570570	11.8185
14	63499424	63501424	11.6997
3	133523880	133525880	11.6404
11	107448349	107450349	11.4992
9	114556588	114558588	11.4724
14	105860080	105862080	11.4599
4	155188925	155190925	11.3356
5	113333987	113335987	11.273
4	127198106	127200106	10.9879
14	76514784	76516784	10.9712
15	103519065	103521065	10.969
11	12466387	12468387	10.8164
9	78358837	78360837	10.7994
6	91700311	91702311	10.7958
11	67017213	67019213	10.7718
8	85472308	85474308	10.6516
11	117974617	117976617	10.5084
18	61627289	61629289	10.485
1	13084137	13086137	10.2284
6	145275299	145277299	10.1926
7	144863525	144865525	10.0934
6	122662004	122664004	9.93642
14	55085030	55087030	9.90496
17	47510540	47512540	9.83088
4	137777114	137779114	9.65148
7	79210610	79212610	9.50616
1	135198311	135200311	9.44982
18	38635092	38637092	9.37893
18	75344046	75346046	9.35823
15	62091890	62093890	9.01633
4	55463361	55465361	8.95109
19	25487795	25489795	8.54742
8	88991007	88993007	8.33837
18	75360115	75362115	8.23598
13	109631233	109633233	8.19867
6	31896195	31898195	8.10527
16	29656946	29658946	7.98295
17	37078194	37080194	7.87537
1	119397828	119399828	7.80449
18	35042485	35044485	7.70608
12	56295746	56297746	7.4062
9	56534343	56536343	6.96737
4	155162480	155164480	6.81198
12	12802861	12804861	6.76309
1	89869840	89871840	6.26813
6	122706443	122708443	6.23138
8	12501472	12503472	5.99635
12	110417136	110419136	5.98888
1	119304609	119306609	5.96347
4	138444149	138446149	5.56912
17	10365258	10367258	5.4643
5	119584146	119586146	5.45034
9	120689732	120691732	4.46702
5	119578954	119580954	3.85414
5	119712016	119714016	2.38969
10	59973501	59975501	1.78961
18	40307184	40309184	1.42514

## Sheet: High H3K27ac inside SE
Chromosome	Start	End	Feature	Description	Distance from gene to MTL	RPKM value
1	36013172	36015172	Hs6st1-001	heparan sulfate 6-O-sulfotransferase 1 [Source:MGI Symbol;Acc:MGI:1354958]	53228	7.88167
1	36985051	36987051	Vwa3b-001	von Willebrand factor A domain containing 3B [Source:MGI Symbol;Acc:MGI:1918103]	39545	0.23706
1	36986706	36988706	Vwa3b-001	von Willebrand factor A domain containing 3B [Source:MGI Symbol;Acc:MGI:1918103]	37890	0.23706
1	84859898	84861898	Fbxo36-001	F-box protein 36 [Source:MGI Symbol;Acc:MGI:1289192]	genic	0.430391
1	166124324	166126324	Dusp27-201	dual specificity phosphatase 27 (putative) [Source:MGI Symbol;Acc:MGI:2685055]	genic	6.94974
1	180887918	180889918	Lefty2-001	left-right determination factor 2 [Source:MGI Symbol;Acc:MGI:2443573]	3190	83.4601
1	182029345	182031345	Enah-201	enabled homolog (Drosophila) [Source:MGI Symbol;Acc:MGI:108360]	9365	24.8467
2	20654213	20656213	Etl4-007	enhancer trap locus 4 [Source:MGI Symbol;Acc:MGI:95454]	genic	2.2625
2	152176486	152178486	Tcf15-001	transcription factor 15 [Source:MGI Symbol;Acc:MGI:104664]	27389	2.90793
2	154422707	154424707	Cbfa2t2-001	core-binding factor, runt domain, alpha subunit 2, translocated to, 2 (human) [Source:MGI Symbol;Acc:MGI:1333833]	11774	5.90663
2	154425592	154427592	Cbfa2t2-001	core-binding factor, runt domain, alpha subunit 2, translocated to, 2 (human) [Source:MGI Symbol;Acc:MGI:1333833]	8889	5.90663
2	154427053	154429053	Cbfa2t2-001	core-binding factor, runt domain, alpha subunit 2, translocated to, 2 (human) [Source:MGI Symbol;Acc:MGI:1333833]	7428	5.90663
2	163030782	163032782	Ift52-001	intraflagellar transport 52 homolog (Chlamydomonas) [Source:MGI Symbol;Acc:MGI:2387217]	genic	13.6121
2	163051345	163053345	Mybl2-001	myeloblastosis oncogene-like 2 [Source:MGI Symbol;Acc:MGI:101785]	1342	57.5776
2	166156351	166158351	Ncoa3-201	nuclear receptor coactivator 3 [Source:MGI Symbol;Acc:MGI:1276535]	688	9.1331
3	9641136	9643136	Zfp704-201	zinc finger protein 704 [Source:MGI Symbol;Acc:MGI:2180715]	31051	2.6701
3	34755750	34757750	Sox2ot-006	SOX2 overlapping transcript (non-protein coding) [Source:MGI Symbol;Acc:MGI:2444112]	73131	0.0982561
3	34757030	34759030	Sox2ot-006	SOX2 overlapping transcript (non-protein coding) [Source:MGI Symbol;Acc:MGI:2444112]	74411	0.0982561
3	34760362	34762362	Sox2ot-006	SOX2 overlapping transcript (non-protein coding) [Source:MGI Symbol;Acc:MGI:2444112]	77743	0.0982561
3	88570943	88572943	Ubqln4-201	ubiquilin 4 [Source:MGI Symbol;Acc:MGI:2150152]	1218	21.0804
3	103207020	103209020	Bcas2-001	breast carcinoma amplified sequence 2 [Source:MGI Symbol;Acc:MGI:1915433]	27854	11.1863
3	135545643	135547643	Manba-001	mannosidase, beta A, lysosomal [Source:MGI Symbol;Acc:MGI:88175]	genic	3.5162
3	135546506	135548506	Manba-001	mannosidase, beta A, lysosomal [Source:MGI Symbol;Acc:MGI:88175]	genic	3.5162
4	55474528	55476528	Gm12510-001	predicted gene 12510 [Source:MGI Symbol;Acc:MGI:3651360]	8714	0.281154
4	55476812	55478812	Gm12510-001	predicted gene 12510 [Source:MGI Symbol;Acc:MGI:3651360]	10998	0.281154
4	119070960	119072960	Slc2a1-001	solute carrier family 2 (facilitated glucose transporter), member 1 [Source:MGI Symbol;Acc:MGI:95755]	35751	62.6285
4	123623630	123625630	Macf1-003	microtubule-actin crosslinking factor 1 [Source:MGI Symbol;Acc:MGI:108559]	genic	10.2881
4	123624512	123626512	Macf1-003	microtubule-actin crosslinking factor 1 [Source:MGI Symbol;Acc:MGI:108559]	59848	10.2881
4	130519202	130521202	Nkain1-201	Na+/K+ transporting ATPase interacting 1 [Source:MGI Symbol;Acc:MGI:1914399]	54834	10.768
4	130639284	130641284	Pum1-001	pumilio 1 (Drosophila) [Source:MGI Symbol;Acc:MGI:1931749]	22037	0.7469
4	141564566	141566566	Fblim1-001	filamin binding LIM protein 1 [Source:MGI Symbol;Acc:MGI:1921452]	9496	2.90771
4	141569257	141571257	Fblim1-001	filamin binding LIM protein 1 [Source:MGI Symbol;Acc:MGI:1921452]	4805	2.90771
4	142070035	142072035	Tmem51-001	transmembrane protein 51 [Source:MGI Symbol;Acc:MGI:2384874]	genic	1.97222
5	33534622	33536622	Fam53a-001	family with sequence similarity 53, member A [Source:MGI Symbol;Acc:MGI:1919225]	63729	1.17121
5	64863913	64865913	Klf3-201	Kruppel-like factor 3 (basic) [Source:MGI Symbol;Acc:MGI:1342773]	33784	3.11341
5	118435689	118437689	Med13l-201	mediator complex subunit 13-like [Source:MGI Symbol;Acc:MGI:2670178]	123030	2.7298
5	123134349	123136349	Tmem120b-008	transmembrane protein 120B [Source:MGI Symbol;Acc:MGI:3603158]	1657	0.171399
5	123137547	123139547	Setd1b-004	SET domain containing 1B [Source:MGI Symbol;Acc:MGI:2652820]	4646	0.265972
6	39445174	39447174	Dennd2a-001	DENN/MADD domain containing 2A [Source:MGI Symbol;Acc:MGI:2444961]	15204	2.39337
6	65020995	65022995	Smarcad1-201	SWI/SNF-related, matrix-associated actin-dependent regulator of chromatin, subfamily a, containing DEAD/H box 1 [Source:MGI Symbol;Acc:MGI:95453]	19672	11.1462
6	65023867	65025867	Smarcad1-201	SWI/SNF-related, matrix-associated actin-dependent regulator of chromatin, subfamily a, containing DEAD/H box 1 [Source:MGI Symbol;Acc:MGI:95453]	16800	11.1462
6	83892817	83894817	Zfml-201	zinc finger, matrin-like [Source:MGI Symbol;Acc:MGI:1203484]	21536	6.10482
6	122340047	122342047	Phc1-201	polyhomeotic-like 1 (Drosophila) [Source:MGI Symbol;Acc:MGI:103248]	genic	20.8602
6	122341285	122343285	Phc1-201	polyhomeotic-like 1 (Drosophila) [Source:MGI Symbol;Acc:MGI:103248]	724	20.8602
6	122701777	122703777	Nanog-003	Nanog homeobox [Source:MGI Symbol;Acc:MGI:1919200]	3712	99.1144
6	122764073	122766073	Slc2a3-001	solute carrier family 2 (facilitated glucose transporter), member 3 [Source:MGI Symbol;Acc:MGI:95757]	genic	108.548
6	122765476	122767476	Slc2a3-001	solute carrier family 2 (facilitated glucose transporter), member 3 [Source:MGI Symbol;Acc:MGI:95757]	genic	108.548
7	3200385	3202385	Nlrp12-201	NLR family, pyrin domain containing 12 [Source:MGI Symbol;Acc:MGI:2676630]	19125	0.174371
7	3205869	3207869	Nlrp12-201	NLR family, pyrin domain containing 12 [Source:MGI Symbol;Acc:MGI:2676630]	13641	0.174371
7	3211373	3213373	Nlrp12-201	NLR family, pyrin domain containing 12 [Source:MGI Symbol;Acc:MGI:2676630]	8137	0.174371
7	13013495	13015495	Zbtb45-202	zinc finger and BTB domain containing 45 [Source:MGI Symbol;Acc:MGI:2685003]	3673	3.57705
7	45550663	45552663	Hsd17b14-001	hydroxysteroid (17-beta) dehydrogenase 14 [Source:MGI Symbol;Acc:MGI:1913315]	4230	8.73848
7	63956120	63958120	Klf13-201	Kruppel-like factor 13 [Source:MGI Symbol;Acc:MGI:1354948]	17205	5.22069
7	80014366	80016366	Zfp710-202	zinc finger protein 710 [Source:MGI Symbol;Acc:MGI:1921747]	8448	12.1739
7	80129606	80131606	Idh2-001	isocitrate dehydrogenase 2 (NADP+), mitochondrial [Source:MGI Symbol;Acc:MGI:96414]	14214	60.4124
7	112690476	112692476	2310014F06Rik-001	RIKEN cDNA 2310014F06 gene [Source:MGI Symbol;Acc:MGI:1916875]	genic	3.85164
7	133114235	133116235	Fgfr2-007	fibroblast growth factor receptor 2 [Source:MGI Symbol;Acc:MGI:95523]	genic	8.54419
8	33915337	33917337	Rbpms-201	RNA binding protein gene with multiple splicing [Source:MGI Symbol;Acc:MGI:1334446]	14504	12.3105
8	36548278	36550278	6430573F11Rik-002	RIKEN cDNA 6430573F11 gene [Source:MGI Symbol;Acc:MGI:2442328]	90730	0.299322
8	43319979	43321979	Zfp42-201	zinc finger protein 42 [Source:MGI Symbol;Acc:MGI:99187]	12970	107.682
8	89002855	89004855	Sall1-201	sal-like 1 (Drosophila) [Source:MGI Symbol;Acc:MGI:1889585]	22393	7.91463
8	89014830	89016830	Sall1-201	sal-like 1 (Drosophila) [Source:MGI Symbol;Acc:MGI:1889585]	10418	7.91463
9	58278724	58280724	Loxl1-201	lysyl oxidase-like 1 [Source:MGI Symbol;Acc:MGI:106096]	6999	0.190566
9	110946679	110948679	Tdgf1-201	teratocarcinoma-derived growth factor 1 [Source:MGI Symbol;Acc:MGI:98658]	521	101.553
10	62892047	62894047	Tet1-201	tet methylcytosine dioxygenase 1 [Source:MGI Symbol;Acc:MGI:1098693]	genic	8.12168
10	62894654	62896654	Tet1-201	tet methylcytosine dioxygenase 1 [Source:MGI Symbol;Acc:MGI:1098693]	genic	8.12168
10	67095174	67097174	Reep3-201	receptor accessory protein 3 [Source:MGI Symbol;Acc:MGI:88930]	1814	1.29554
10	80050295	80052295	Gpx4-006	glutathione peroxidase 4 [Source:MGI Symbol;Acc:MGI:104767]	genic	134.351
10	85538840	85540840	Btbd11-001	BTB (POZ) domain containing 11 [Source:MGI Symbol;Acc:MGI:1921257]	genic	1.04486
11	9115065	9117065	Upp1-001	uridine phosphorylase 1 [Source:MGI Symbol;Acc:MGI:1097668]	1038	88.3266
11	9116134	9118134	Upp1-001	uridine phosphorylase 1 [Source:MGI Symbol;Acc:MGI:1097668]	genic	88.3266
11	33536793	33538793	Gm12116-001	predicted gene 12116 [Source:MGI Symbol;Acc:MGI:3652289]	23047	2.87388
11	62510368	62512368	Ncor1-012	nuclear receptor co-repressor 1 [Source:MGI Symbol;Acc:MGI:1349717]	genic	9.19198
11	67010806	67012806	Tmem220-002	transmembrane protein 220 [Source:MGI Symbol;Acc:MGI:2443691]	12348	0.437032
11	69703226	69705226	2010012P19Rik-003	RIKEN cDNA 2010012P19 gene [Source:MGI Symbol;Acc:MGI:1919587]	7128	1.79266
11	97661257	97663257	Mllt6-001	myeloid/lymphoid or mixed-lineage leukemia (trithorax homolog, Drosophila); translocated to, 6 [Source:MGI Symbol;Acc:MGI:1935145]	157	5.77914
12	12942483	12944483	Mycn-001	v-myc myelocytomatosis viral related oncogene, neuroblastoma derived (avian) [Source:MGI Symbol;Acc:MGI:97357]	569	20.6704
12	55504547	55506547	Nfkbia-201	nuclear factor of kappa light polypeptide gene enhancer in B cells inhibitor, alpha [Source:MGI Symbol;Acc:MGI:104741]	11900	11.5148
12	86497877	86499877	Esrrb-001	estrogen related receptor, beta [Source:MGI Symbol;Acc:MGI:1346832]	genic	76.6965
12	86500815	86502815	Esrrb-001	estrogen related receptor, beta [Source:MGI Symbol;Acc:MGI:1346832]	genic	76.6965
12	86503662	86505662	Esrrb-001	estrogen related receptor, beta [Source:MGI Symbol;Acc:MGI:1346832]	genic	76.6965
13	95533383	95535383	F2rl1-201	coagulation factor II (thrombin) receptor-like 1 [Source:MGI Symbol;Acc:MGI:101910]	8143	3.04273
14	21485288	21487288	Myst4-201	MYST histone acetyltransferase monocytic leukemia 4 [Source:MGI Symbol;Acc:MGI:1858746]	12497	10.8599
14	99339108	99341108	Klf5-201	Kruppel-like factor 5 [Source:MGI Symbol;Acc:MGI:1338056]	25703	14.2327
14	105858679	105860679	Spry2-201	sprouty homolog 2 (Drosophila) [Source:MGI Symbol;Acc:MGI:1345138]	31270	2.57495
15	77354494	77356494	Rbfox2-201	RNA binding protein, fox-1 homolog (C. elegans) 2 [Source:MGI Symbol;Acc:MGI:1933973]	47441	6.46542
15	88708085	88710085	Brd1-001	bromodomain containing 1 [Source:MGI Symbol;Acc:MGI:1924161]	genic	7.41737
15	97592891	97594891	Rpap3-201	RNA polymerase II associated protein 3 [Source:MGI Symbol;Acc:MGI:1277218]	80214	8.18124
16	84768403	84770403	Jam2-001	junction adhesion molecule 2 [Source:MGI Symbol;Acc:MGI:1933820]	3720	14.3702
17	29450382	29452382	Pim1-201	proviral integration site 1 [Source:MGI Symbol;Acc:MGI:97584]	38430	26.025
17	31807261	31809261	Sik1-201	salt inducible kinase 1 [Source:MGI Symbol;Acc:MGI:104754]	34987	6.68778
17	35503055	35505055	Pou5f1-001	POU domain, class 5, transcription factor 1 [Source:MGI Symbol;Acc:MGI:101893]	982	0.4979
17	36994639	36996639	Zfp57-001	zinc finger protein 57 [Source:MGI Symbol;Acc:MGI:99204]	4524	28.9279
17	66479140	66481140	Rab12-001	RAB12, member RAS oncogene family [Source:MGI Symbol;Acc:MGI:894284]	13372	5.17423
17	70827529	70829529	Gm20703-001	predicted gene 20703 [Source:MGI Symbol;Acc:MGI:5313150]	5135	1.56411
19	23132446	23134446	2410080I02Rik-001	RIKEN cDNA 2410080I02 gene [Source:MGI Symbol;Acc:MGI:1915498]	454	1.47504
X	8007709	8009709	Glod5-001	glyoxalase domain containing 5 [Source:MGI Symbol;Acc:MGI:1917074]	genic	0.617521

## Sheet: High H3K27ac outside SE
Chromosome	Start	End	Feature	Description	Distance from gene to MTL	RPKM value
1	12743721	12745721	Sulf1-203	sulfatase 1 [Source:MGI Symbol;Acc:MGI:2138563]	genic	4.98633
1	52952546	52954546	1700019D03Rik-001	RIKEN cDNA 1700019D03 gene [Source:MGI Symbol;Acc:MGI:1914330]	genic	2.10395
1	60850107	60852107	Raph1-201	Ras association (RalGDS/AF-6) and pleckstrin homology domains 1 [Source:MGI Symbol;Acc:MGI:1924550]	283003	2.81694
1	77453030	77455030	Epha4-201	Eph receptor A4 [Source:MGI Symbol;Acc:MGI:98277]	genic	6.2847
1	86308514	86310514	B3gnt7-201	UDP-GlcNAc:betaGal beta-1,3-N-acetylglucosaminyltransferase 7 [Source:MGI Symbol;Acc:MGI:2384394]	1211	7.84691
1	86310190	86312190	B3gnt7-201	UDP-GlcNAc:betaGal beta-1,3-N-acetylglucosaminyltransferase 7 [Source:MGI Symbol;Acc:MGI:2384394]	2887	7.84691
1	86486615	86488615	Ptma-201	prothymosin alpha [Source:MGI Symbol;Acc:MGI:97803]	38121	1240.02
1	86525427	86527427	Ptma-201	prothymosin alpha [Source:MGI Symbol;Acc:MGI:97803]	genic	1240.02
1	87225538	87227538	Eif4e2-001	eukaryotic translation initiation factor 4E member 2 [Source:MGI Symbol;Acc:MGI:1914440]	genic	18.3182
1	119048220	119050220	Gli2-001	GLI-Kruppel family member GLI2 [Source:MGI Symbol;Acc:MGI:95728]	genic	2.42751
1	127773047	127775047	Ccnt2-001	cyclin T2 [Source:MGI Symbol;Acc:MGI:1920199]	genic	4.29398
1	132200099	132202099	Cdk18-201	cyclin-dependent kinase 18 [Source:MGI Symbol;Acc:MGI:97518]	60414	2.37191
1	132470245	132472245	Dstyk-201	dual serine/threonine and tyrosine protein kinase [Source:MGI Symbol;Acc:MGI:1925064]	3286	2.04033
1	133693523	133695523	Lax1-201	lymphocyte transmembrane adaptor 1 [Source:MGI Symbol;Acc:MGI:2443362]	3415	0.647467
1	153375655	153377655	E330020D12Rik-201	Riken cDNA E330020D12 gene [Source:MGI Symbol;Acc:MGI:3761270]	27172	0.32521
1	178336992	178338992	Gm16586-001	predicted gene 16586 [Source:MGI Symbol;Acc:MGI:4415006]	genic	65.4511
2	29819608	29821608	Urm1-004	ubiquitin related modifier 1 homolog (S. cerevisiae) [Source:MGI Symbol;Acc:MGI:1915455]	genic	4.9619
2	31571258	31573258	Fubp3-001	far upstream element (FUSE) binding protein 3 [Source:MGI Symbol;Acc:MGI:2443699]	genic	13.0139
2	52071483	52073483	Rif1-201	Rap1 interacting factor 1 homolog (yeast) [Source:MGI Symbol;Acc:MGI:1098622]	genic	16.5971
2	129799304	129801304	Stk35-002	serine/threonine kinase 35 [Source:MGI Symbol;Acc:MGI:1914583]	genic	8.56772
2	153345807	153347807	2500004C02Rik-001	RIKEN cDNA 2500004C02 gene [Source:MGI Symbol;Acc:MGI:1919576]	genic	0.233072
2	154612714	154614714	Zfp341-001	zinc finger protein 341 [Source:MGI Symbol;Acc:MGI:2682937]	genic	0.786702
2	165809127	165811127	Zmynd8-204	zinc finger, MYND-type containing 8 [Source:MGI Symbol;Acc:MGI:1918025]	genic	0.190257
2	168954863	168956863	Zfp64-001	zinc finger protein 64 [Source:MGI Symbol;Acc:MGI:107342]	genic	3.73626
2	180708020	180710020	Dido1-002	death inducer-obliterator 1 [Source:MGI Symbol;Acc:MGI:1344352]	genic	6.1965
3	14998866	15000866	Car2-201	carbonic anhydrase 2 [Source:MGI Symbol;Acc:MGI:88269]	98097	2.1097
3	22155608	22157608	Tbl1xr1-201	transducin (beta)-like 1X-linked receptor 1 [Source:MGI Symbol;Acc:MGI:2441730]	genic	6.31805
3	34034906	34036906	Fxr1-201	fragile X mental retardation gene 1, autosomal homolog [Source:MGI Symbol;Acc:MGI:104860]	genic	5.68118
3	65658107	65660107	4931440P22Rik-002	RIKEN cDNA 4931440P22 gene [Source:MGI Symbol;Acc:MGI:1918254]	102962	4.40781
3	88509047	88511047	Lmna-001	lamin A [Source:MGI Symbol;Acc:MGI:96794]	genic	0.626336
3	97158391	97160391	Acp6-001	acid phosphatase 6, lysophosphatidic [Source:MGI Symbol;Acc:MGI:1931010]	genic	17.0774
4	53338823	53340823	Slc44a1-001	solute carrier family 44, member 1 [Source:MGI Symbol;Acc:MGI:2140592]	99590	7.61927
4	54986466	54988466	Zfp462-002	zinc finger protein 462 [Source:MGI Symbol;Acc:MGI:107690]	genic	4.47135
4	83328886	83330886	Ttc39b-001	tetratricopeptide repeat domain 39B [Source:MGI Symbol;Acc:MGI:1917113]	4631	3.03783
4	84661447	84663447	Bnc2-002	basonuclin 2 [Source:MGI Symbol;Acc:MGI:2443805]	genic	0.727368
4	133899684	133901684	Rps6ka1-001	ribosomal protein S6 kinase polypeptide 1 [Source:MGI Symbol;Acc:MGI:104558]	11887	13.5528
4	134467495	134469495	Stmn1-001	stathmin 1 [Source:MGI Symbol;Acc:MGI:96739]	genic	109.147
4	141290664	141292664	Epha2-001	Eph receptor A2 [Source:MGI Symbol;Acc:MGI:95278]	8576	6.14244
5	8423362	8425362	Slc25a40-201	solute carrier family 25, member 40 [Source:MGI Symbol;Acc:MGI:2442486]	genic	0.72995
5	25553875	25555875	Mll3-006	myeloid/lymphoid or mixed-lineage leukemia 3 [Source:MGI Symbol;Acc:MGI:2444959]	55092	2.79135
5	28209025	28211025	Cnpy1-001	canopy 1 homolog (zebrafish) [Source:MGI Symbol;Acc:MGI:2442451]	genic	0.800302
5	50122195	50124195	Gpr125-201	G protein-coupled receptor 125 [Source:MGI Symbol;Acc:MGI:1917943]	63199	6.40232
5	53670674	53672674	Rbpj-202	recombination signal binding protein for immunoglobulin kappa J region [Source:MGI Symbol;Acc:MGI:96522]	13229	28.1972
5	103723691	103725691	Aff1-003	AF4/FMR2 family, member 1 [Source:MGI Symbol;Acc:MGI:1100819]	genic	6.61264
5	108076143	108078143	Mtf2-002	metal response element binding transcription factor 2 [Source:MGI Symbol;Acc:MGI:105050]	genic	0.785484
5	110468565	110470565	Fbrsl1-202	fibrosin-like 1 [Source:MGI Symbol;Acc:MGI:1920907]	20062	1.56016
5	135933868	135935868	Ywhag-001	tyrosine 3-monooxygenase/tryptophan 5-monooxygenase activation protein, gamma polypeptide [Source:MGI Symbol;Acc:MGI:108109]	genic	23.6648
5	145230490	145232490	Zfp655-202	zinc finger protein 655 [Source:MGI Symbol;Acc:MGI:1919861]	genic	6.18354
6	72786773	72788773	Tcf7l1-001	transcription factor 7 like 1 (T cell specific, HMG box) [Source:MGI Symbol;Acc:MGI:1202876]	genic	3.3104
6	82772329	82774329	Hk2-001	hexokinase 2 [Source:MGI Symbol;Acc:MGI:1315197]	genic	18.5856
6	100377208	100379208	Rybp-201	RING1 and YY1 binding protein [Source:MGI Symbol;Acc:MGI:1929059]	89767	18.3803
6	136469847	136471847	Atf7ip-201	activating transcription factor 7 interacting protein [Source:MGI Symbol;Acc:MGI:1858965]	47004	8.03162
6	136489152	136491152	Atf7ip-201	activating transcription factor 7 interacting protein [Source:MGI Symbol;Acc:MGI:1858965]	27699	8.03162
6	148991550	148993550	Dennd5b-001	DENN/MADD domain containing 5B [Source:MGI Symbol;Acc:MGI:2444273]	genic	1.98681
7	6257590	6259590	Gm6792-001	predicted gene 6792 [Source:MGI Symbol;Acc:MGI:3643580]	genic	2.7244
7	73617240	73619240	Chd2-001	chromodomain helicase DNA binding protein 2 [Source:MGI Symbol;Acc:MGI:2448567]	75494	5.86254
7	107236004	107238004	Gm15514-001	predicted gene 15514 [Source:MGI Symbol;Acc:MGI:3645719]	5018	0.675109
7	140958557	140960557	Ifitm2-201	interferon induced transmembrane protein 2 [Source:MGI Symbol;Acc:MGI:1933382]	2596	188.973
8	43306144	43308144	Zfp42-201	zinc finger protein 42 [Source:MGI Symbol;Acc:MGI:99187]	genic	107.682
8	68419544	68421544	Sh2d4a-001	SH2 domain containing 4A [Source:MGI Symbol;Acc:MGI:1919531]	71850	0.920542
8	72333361	72335361	Eps15l1-201	epidermal growth factor receptor pathway substrate 15-like 1 [Source:MGI Symbol;Acc:MGI:104582]	5640	8.74339
8	86887232	86889232	N4bp1-201	NEDD4 binding protein 1 [Source:MGI Symbol;Acc:MGI:2136825]	1974	7.03402
8	106934605	106936605	Sntb2-201	syntrophin, basic 2 [Source:MGI Symbol;Acc:MGI:101771]	genic	2.05948
9	40239277	40241277	Scn3b-201	sodium channel, voltage-gated, type III, beta [Source:MGI Symbol;Acc:MGI:1918882]	27939	0.143754
9	102689357	102691357	Amotl2-006	angiomotin-like 2 [Source:MGI Symbol;Acc:MGI:1929286]	25315	3.56305
9	106170849	106172849	Wdr82-201	WD repeat domain containing 82 [Source:MGI Symbol;Acc:MGI:1924555]	genic	29.5603
9	108566360	108568360	Ndufaf3-201	NADH dehydrogenase (ubiquinone) 1 alpha subcomplex, assembly factor 3 [Source:MGI Symbol;Acc:MGI:1913956]	genic	9.75448
9	114583570	114585570	Cnot10-201	CCR4-NOT transcription complex, subunit 10 [Source:MGI Symbol;Acc:MGI:1926143]	308	21.1197
10	3940417	3942417	Plekhg1-001	pleckstrin homology domain containing, family G (with RhoGef domain) member 1 [Source:MGI Symbol;Acc:MGI:2676551]	genic	1.76442
10	19207278	19209278	Tnfaip3-001	tumor necrosis factor, alpha-induced protein 3 [Source:MGI Symbol;Acc:MGI:1196377]	191621	0.139675
10	52273144	52275144	Dcbld1-001	discoidin, CUB and LCCL domain containing 1 [Source:MGI Symbol;Acc:MGI:1913936]	genic	2.093
10	61415302	61417302	Nodal-001	nodal [Source:MGI Symbol;Acc:MGI:97359]	670	16.4609
10	67002100	67004100	Reep3-201	receptor accessory protein 3 [Source:MGI Symbol;Acc:MGI:88930]	5089	3.81569
10	68135834	68137834	Arid5b-201	AT rich interactive domain 5B (MRF1-like) [Source:MGI Symbol;Acc:MGI:2175912]	genic	3.73683
10	68136547	68138547	Arid5b-201	AT rich interactive domain 5B (MRF1-like) [Source:MGI Symbol;Acc:MGI:2175912]	genic	3.73683
10	95414647	95416647	Socs2-002	suppressor of cytokine signaling 2 [Source:MGI Symbol;Acc:MGI:1201787]	genic	2.46497
10	108286039	108288039	Ppp1r12a-201	protein phosphatase 1, regulatory (inhibitor) subunit 12A [Source:MGI Symbol;Acc:MGI:1309528]	8464	9.22668
10	116561328	116563328	Cnot2-202	CCR4-NOT transcription complex, subunit 2 [Source:MGI Symbol;Acc:MGI:1919318]	genic	11.2035
10	120170501	120172501	Irak3-001	interleukin-1 receptor-associated kinase 3 [Source:MGI Symbol;Acc:MGI:1921164]	genic	3.70017
11	6894286	6896286	Adcy1-001	adenylate cyclase 1 [Source:MGI Symbol;Acc:MGI:99677]	167203	1.08846
11	20230159	20232159	Cep68-001	centrosomal protein 68 [Source:MGI Symbol;Acc:MGI:2667663]	genic	2.93851
11	60175912	60177912	Rai1-002	retinoic acid induced 1 [Source:MGI Symbol;Acc:MGI:103291]	genic	3.93965
11	69580778	69582778	Trp53-001	transformation related protein 53 [Source:MGI Symbol;Acc:MGI:98834]	genic	47.9491
11	96006186	96008186	Igf2bp1-001	insulin-like growth factor 2 mRNA binding protein 1 [Source:MGI Symbol;Acc:MGI:1890357]	246	29.8849
11	102406691	102408691	Slc25a39-003	solute carrier family 25, member 39 [Source:MGI Symbol;Acc:MGI:1196386]	genic	45.654
11	120349435	120351435	0610009L18Rik-001	RIKEN cDNA 0610009L18 gene [Source:MGI Symbol;Acc:MGI:1914088]	genic	0.424758
12	4897190	4899190	Ubxn2a-001	UBX domain protein 2A [Source:MGI Symbol;Acc:MGI:2442310]	genic	8.04536
12	39997063	39999063	Arl4a-003	ADP-ribosylation factor-like 4A [Source:MGI Symbol;Acc:MGI:99437]	6384	0.39318
12	51347076	51349076	G2e3-001	G2/M-phase specific E3 ubiquitin ligase [Source:MGI Symbol;Acc:MGI:2444298]	genic	3.19534
12	73085201	73087201	Six4-001	sine oculis-related homeobox 4 homolog (Drosophila) [Source:MGI Symbol;Acc:MGI:106034]	12408	5.36376
12	109947527	109949527	Dio3-001	deiodinase, iodothyronine type III [Source:MGI Symbol;Acc:MGI:1306782]	329541	9.409
13	23738549	23740549	Hist1h1c-001	histone cluster 1, H1c [Source:MGI Symbol;Acc:MGI:1931526]	genic	177.36
13	23741174	23743174	Hist1h1c-001	histone cluster 1, H1c [Source:MGI Symbol;Acc:MGI:1931526]	808	177.36
13	44704609	44706609	Jarid2-009	jumonji, AT rich interactive domain 2 [Source:MGI Symbol;Acc:MGI:104813]	22865	25.7264
13	63271723	63273723	2010111I01Rik-202	RIKEN cDNA 2010111I01 gene [Source:MGI Symbol;Acc:MGI:1919311]	genic	0.578434
13	80884959	80886959	Arrdc3-004	arrestin domain containing 3 [Source:MGI Symbol;Acc:MGI:2145242]	genic	0.251844
13	112461633	112463633	Il6st-201	interleukin 6 signal transducer [Source:MGI Symbol;Acc:MGI:96560]	11375	13.9235
13	113793169	113795169	Arl15-001	ADP-ribosylation factor-like 15 [Source:MGI Symbol;Acc:MGI:2442308]	genic	5.0677
14	19749825	19751825	Nid2-201	nidogen 2 [Source:MGI Symbol;Acc:MGI:1298229]	genic	79.5236
14	45444466	45446466	Fermt2-001	fermitin family homolog 2 (Drosophila) [Source:MGI Symbol;Acc:MGI:2385001]	12326	12.1584
15	7115916	7117916	Lifr-201	leukemia inhibitory factor receptor [Source:MGI Symbol;Acc:MGI:96788]	11643	2.96892
15	50899686	50901686	Trps1-202	trichorhinophalangeal syndrome I (human) [Source:MGI Symbol;Acc:MGI:1927616]	9645	0.705126
15	62958122	62960122	Myc-001	myelocytomatosis oncogene [Source:MGI Symbol;Acc:MGI:97250]	967748	1.87922
15	93397159	93399159	Zcrb1-002	zinc finger CCHC-type and RNA binding motif 1 [Source:MGI Symbol;Acc:MGI:1914447]	genic	0.866357
16	22401774	22403774	Etv5-001	ets variant gene 5 [Source:MGI Symbol;Acc:MGI:1096867]	genic	33.4814
16	22410920	22412920	Etv5-001	ets variant gene 5 [Source:MGI Symbol;Acc:MGI:1096867]	genic	33.4814
16	23106602	23108602	Eif4a2-001	eukaryotic translation initiation factor 4A2 [Source:MGI Symbol;Acc:MGI:106906]	genic	19.9375
16	42780976	42782976	Gap43-001	growth associated protein 43 [Source:MGI Symbol;Acc:MGI:95639]	440325	0.439945
17	13658058	13660058	Tcte2-010	t-complex-associated testis expressed 2 [Source:MGI Symbol;Acc:MGI:98641]	genic	0.20537
17	29007017	29009017	Stk38-001	serine/threonine kinase 38 [Source:MGI Symbol;Acc:MGI:2442572]	genic	6.66608
17	46811602	46813602	BC032203-201	cDNA sequence BC032203 [Source:MGI Symbol;Acc:MGI:2673855]	genic	4.20012
17	79341968	79343968	Cdc42ep3-201	CDC42 effector protein (Rho GTPase binding) 3 [Source:MGI Symbol;Acc:MGI:2384718]	genic	3.18648
17	80800352	80802352	Map4k3-202	mitogen-activated protein kinase kinase kinase kinase 3 [Source:MGI Symbol;Acc:MGI:2154405]	72259	5.93362
17	87973050	87975050	Msh6-201	mutS homolog 6 (E. coli) [Source:MGI Symbol;Acc:MGI:1343961]	genic	3.21534
18	17418033	17420033	Cdh2-001	cadherin 2 [Source:MGI Symbol;Acc:MGI:88355]	608787	0.356461
18	30120795	30122795	Pik3c3-001	phosphoinositide-3-kinase, class 3 [Source:MGI Symbol;Acc:MGI:2445019]	149952	5.13142
18	35822021	35824021	Cxxc5-201	CXXC finger 5 [Source:MGI Symbol;Acc:MGI:1914643]	5797	11.9809
18	36414686	36416686	Pfdn1-201	prefoldin 1 [Source:MGI Symbol;Acc:MGI:1914449]	genic	40.7063
18	57877021	57879021	Slc12a2-201	solute carrier family 12, member 2 [Source:MGI Symbol;Acc:MGI:101924]	genic	5.47133
18	69781320	69783320	Tcf4-003	transcription factor 4 [Source:MGI Symbol;Acc:MGI:98506]	93353	0.456961
18	77037227	77039227	Katnal2-001	katanin p60 subunit A-like 2 [Source:MGI Symbol;Acc:MGI:1924234]	genic	0.158727
18	84933484	84935484	Fbxo15-201	F-box protein 15 [Source:MGI Symbol;Acc:MGI:1354755]	genic	2.01878
19	3841695	3843695	Gm16066-001	predicted gene 16066 [Source:MGI Symbol;Acc:MGI:3801953]	8078	4.18148
19	4809529	4811529	Spnb3-201	spectrin beta 3 [Source:MGI Symbol;Acc:MGI:1313261]	genic	4.14675
19	5489691	5491691	Cfl1-201	cofilin 1, non-muscle [Source:MGI Symbol;Acc:MGI:101757]	genic	326.647
19	5802546	5804546	Malat1-001	metastasis associated lung adenocarcinoma transcript 1 (non-coding RNA) [Source:MGI Symbol;Acc:MGI:1919539]	genic	65.4076
19	14834733	14836733	Tle4-201	transducin-like enhancer of split 4, homolog of Drosophila E(spl) [Source:MGI Symbol;Acc:MGI:104633]	236682	15.2739
19	17137068	17139068	Prune2-201	prune homolog 2 (Drosophila) [Source:MGI Symbol;Acc:MGI:1925004]	genic	0.538226
19	29007270	29009270	Cdc37l1-201	cell division cycle 37 homolog (S. cerevisiae)-like 1 [Source:MGI Symbol;Acc:MGI:1914322]	genic	8.19167
19	32254422	32256422	Sgms1-001	sphingomyelin synthase 1 [Source:MGI Symbol;Acc:MGI:2444110]	genic	1.52846
19	38063383	38065383	Cep55-201	centrosomal protein 55 [Source:MGI Symbol;Acc:MGI:1921357]	genic	9.77597
19	46044508	46046508	Ldb1-002	LIM domain binding 1 [Source:MGI Symbol;Acc:MGI:894762]	genic	7.26161
X	13046423	13048423	5730405O15Rik-001	RIKEN cDNA 5730405O15 gene [Source:MGI Symbol;Acc:MGI:1917739]	1126	0.711408
X	101395708	101397708	Zmym3-001	zinc finger, MYM-type 3 [Source:MGI Symbol;Acc:MGI:1927231]	6676	9.23328
X	103310924	103312924	4930519F16Rik-001	RIKEN cDNA 4930519F16 gene [Source:MGI Symbol;Acc:MGI:1922356]	genic	0.633099
X	144337083	144339083	Alg13-001	asparagine-linked glycosylation 13 homolog (S. cerevisiae) [Source:MGI Symbol;Acc:MGI:1914824]	genic	46.6381
X	151123124	151125124	Fgd1-002	FYVE, RhoGEF and PH domain containing 1 [Source:MGI Symbol;Acc:MGI:104566]	26581	8.80245
X	162831295	162833295	Rbbp7-001	retinoblastoma binding protein 7 [Source:MGI Symbol;Acc:MGI:1194910]	1841	5.55833

## Sheet: Low H3K27ac
Chromosome	Start	End	Feature	Description	Distance from gene to MTL	RPKM value
1	6457200	6459200	Rb1cc1-009	RB1-inducible coiled-coil 1 [Source:MGI Symbol;Acc:MGI:1341850]	180552	0.143754
1	13084137	13086137	Prdm14-001	PR domain containing 14 [Source:MGI Symbol;Acc:MGI:3588194]	27320	13.1919
1	13659694	13661694	Lactb2-001	lactamase, beta 2 [Source:MGI Symbol;Acc:MGI:2442551]	genic	11.9953
1	17249898	17251898	Jph1-201	junctophilin 1 [Source:MGI Symbol;Acc:MGI:1891495]	152009	0.384479
1	20866636	20868636	Paqr8-201	progestin and adipoQ receptor family member VIII [Source:MGI Symbol;Acc:MGI:1921479]	21986	0.414459
1	36060065	36062065	Hs6st1-001	heparan sulfate 6-O-sulfotransferase 1 [Source:MGI Symbol;Acc:MGI:1354958]	6335	7.88167
1	36067116	36069116	Hs6st1-001	heparan sulfate 6-O-sulfotransferase 1 [Source:MGI Symbol;Acc:MGI:1354958]	genic	7.88167
1	42057687	42059687	Mrps9-201	mitochondrial ribosomal protein S9 [Source:MGI Symbol;Acc:MGI:1916777]	791546	14.373
1	54484033	54486033	Pgap1-201	post-GPI attachment to proteins 1 [Source:MGI Symbol;Acc:MGI:2443342]	genic	1.7181
1	57469483	57471483	1110034B05Rik-001	RIKEN cDNA 1110034B05 gene [Source:MGI Symbol;Acc:MGI:1915986]	51530	3.05716
1	59375483	59377483	Fzd7-001	frizzled homolog 7 (Drosophila) [Source:MGI Symbol;Acc:MGI:108570]	104664	3.55264
1	59422528	59424528	Fzd7-001	frizzled homolog 7 (Drosophila) [Source:MGI Symbol;Acc:MGI:108570]	57619	3.55264
1	62180882	62182882	Nrp2-001	neuropilin 2 [Source:MGI Symbol;Acc:MGI:1100492]	520403	4.63542
1	62766747	62768747	Nrp2-001	neuropilin 2 [Source:MGI Symbol;Acc:MGI:1100492]	genic	4.63542
1	64731881	64733881	Fzd5-201	frizzled homolog 5 (Drosophila) [Source:MGI Symbol;Acc:MGI:108571]	genic	1.98171
1	71645158	71647158	Fn1-201	fibronectin 1 [Source:MGI Symbol;Acc:MGI:95566]	genic	0.0932921
1	71672571	71674571	Fn1-201	fibronectin 1 [Source:MGI Symbol;Acc:MGI:95566]	9728	0.0932921
1	72204351	72206351	Mreg-201	melanoregulin [Source:MGI Symbol;Acc:MGI:2151839]	genic	19.705
1	72213163	72215163	Mreg-201	melanoregulin [Source:MGI Symbol;Acc:MGI:2151839]	856	19.705
1	72241804	72243804	Pecr-002	peroxisomal trans-2-enoyl-CoA reductase [Source:MGI Symbol;Acc:MGI:2148199]	15363	3.8603
1	74110638	74112638	Tns1-201	tensin 1 [Source:MGI Symbol;Acc:MGI:104552]	genic	1.31826
1	74824014	74826014	Gm16582-001	predicted gene 16582 [Source:MGI Symbol;Acc:MGI:4415002]	29015	0.36385
1	86187031	86189031	RP24-308M3.1-001	No description	genic	0.536694
1	87229790	87231790	Eif4e2-001	eukaryotic translation initiation factor 4E member 2 [Source:MGI Symbol;Acc:MGI:1914440]	genic	18.3182
1	89869840	89871840	Agap1-201	ArfGAP with GTPase domain, ankyrin repeat and PH domain 1 [Source:MGI Symbol;Acc:MGI:2653690]	genic	2.57604
1	118647219	118649219	Tfcp2l1-201	transcription factor CP2-like 1 [Source:MGI Symbol;Acc:MGI:2444691]	genic	56.1621
1	119074942	119076942	Gli2-001	GLI-Kruppel family member GLI2 [Source:MGI Symbol;Acc:MGI:95728]	21323	2.42751
1	119304609	119306609	Ralb-001	v-ral simian leukemia viral oncogene homolog B (ras related) [Source:MGI Symbol;Acc:MGI:1927244]	200185	6.45874
1	119397828	119399828	Ralb-001	v-ral simian leukemia viral oncogene homolog B (ras related) [Source:MGI Symbol;Acc:MGI:1927244]	70477	6.45874
1	128391599	128393599	Dars-201	aspartyl-tRNA synthetase [Source:MGI Symbol;Acc:MGI:2442544]	genic	30.536
1	131889367	131891367	Rab7l1-002	RAB7, member RAS oncogene family-like 1 [Source:MGI Symbol;Acc:MGI:2385107]	16480	2.66381
1	132287410	132289410	Nuak2-001	NUAK family, SNF1-like kinase, 2 [Source:MGI Symbol;Acc:MGI:1921387]	26716	1.02773
1	133083312	133085312	Pik3c2b-002	phosphoinositide-3-kinase, class 2, beta polypeptide [Source:MGI Symbol;Acc:MGI:2685045]	genic	0.550923
1	133396946	133398946	Sox13-001	SRY-box containing gene 13 [Source:MGI Symbol;Acc:MGI:98361]	genic	2.28756
1	134534403	134536403	4931440L10Rik-001	RIKEN cDNA 4931440L10 gene [Source:MGI Symbol;Acc:MGI:1918251]	4538	0.229757
1	135198311	135200311	Gm4204-201	predicted gene 4204 [Source:MGI Symbol;Acc:MGI:3782381]	31734	3.66699
1	135216702	135218702	Gm4204-201	predicted gene 4204 [Source:MGI Symbol;Acc:MGI:3782381]	13343	3.66699
1	136695231	136697231	Zfp281-001	zinc finger protein 281 [Source:MGI Symbol;Acc:MGI:3029290]	65178	6.07291
1	136952826	136954826	Nr5a2-201	nuclear receptor subfamily 5, group A, member 2 [Source:MGI Symbol;Acc:MGI:1346834]	7601	5.47448
1	140244709	140246709	Aspm-003	asp (abnormal spindle)-like, microcephaly associated (Drosophila) [Source:MGI Symbol;Acc:MGI:1334448]	750619	4.0492
1	140428449	140430449	Aspm-003	asp (abnormal spindle)-like, microcephaly associated (Drosophila) [Source:MGI Symbol;Acc:MGI:1334448]	934359	4.0492
1	152914745	152916745	Smg7-203	Smg-7 homolog, nonsense mediated mRNA decay factor (C. elegans) [Source:MGI Symbol;Acc:MGI:2682334]	12099	13.0297
1	153423945	153425945	E330020D12Rik-201	Riken cDNA E330020D12 gene [Source:MGI Symbol;Acc:MGI:3761270]	15516	0.32521
1	154079993	154081993	Glul-001	glutamate-ammonia ligase (glutamine synthetase) [Source:MGI Symbol;Acc:MGI:95739]	163083	0.146865
1	156982662	156984662	Ralgps2-202	Ral GEF with PH domain and SH3 binding motif 2 [Source:MGI Symbol;Acc:MGI:1925505]	43036	2.0733
1	157457853	157459853	BC026585-001	cDNA sequence BC026585 [Source:MGI Symbol;Acc:MGI:2448516]	genic	1.57783
1	176643542	176645542	Cep170-201	centrosomal protein 170 [Source:MGI Symbol;Acc:MGI:1918348]	88111	2.02674
1	180923978	180925978	Lefty1-001	left right determination factor 1 [Source:MGI Symbol;Acc:MGI:107405]	9044	36.3429
1	182162176	182164176	Srp9-002	signal recognition particle 9 [Source:MGI Symbol;Acc:MGI:1350930]	29769	16.1762
1	186509710	186511710	Rrp15-001	ribosomal RNA processing 15 homolog (S. cerevisiae) [Source:MGI Symbol;Acc:MGI:1914473]	209268	10.0552
1	189760663	189762663	Ptpn14-201	protein tyrosine phosphatase, non-receptor type 14 [Source:MGI Symbol;Acc:MGI:102467]	genic	1.75009
1	192514552	192516552	Hhat-001	hedgehog acyltransferase [Source:MGI Symbol;Acc:MGI:2444681]	genic	0.140787
2	4574321	4576321	Frmd4a-010	FERM domain containing 4A [Source:MGI Symbol;Acc:MGI:1919850]	genic	0.432246
2	5356087	5358087	Camk1d-001	calcium/calmodulin-dependent protein kinase ID [Source:MGI Symbol;Acc:MGI:2442190]	genic	1.78034
2	13696699	13698699	St8sia6-001	ST8 alpha-N-acetyl-neuraminide alpha-2,8-sialyltransferase 6 [Source:MGI Symbol;Acc:MGI:2386797]	genic	0.388071
2	20495422	20497422	Etl4-007	enhancer trap locus 4 [Source:MGI Symbol;Acc:MGI:95454]	genic	2.2625
2	20594257	20596257	Etl4-007	enhancer trap locus 4 [Source:MGI Symbol;Acc:MGI:95454]	genic	2.2625
2	20933612	20935612	Arhgap21-001	Rho GTPase activating protein 21 [Source:MGI Symbol;Acc:MGI:1918685]	genic	3.66942
2	21392027	21394027	Thnsl1-001	threonine synthase-like 1 (bacterial) [Source:MGI Symbol;Acc:MGI:2139347]	177018	1.0531
2	25179716	25181716	Nrarp-001	Notch-regulated ankyrin repeat protein [Source:MGI Symbol;Acc:MGI:1914372]	genic	0.299966
2	28606541	28608541	Gm13381-002	predicted gene 13381 [Source:MGI Symbol;Acc:MGI:3649650]	22790	2.27846
2	30134338	30136338	Tbc1d13-002	TBC1 domain family, member 13 [Source:MGI Symbol;Acc:MGI:2385326]	genic	36.7854
2	30778372	30780372	1700001O22Rik-003	RIKEN cDNA 1700001O22 gene [Source:MGI Symbol;Acc:MGI:1923631]	14397	0.362014
2	31162854	31164854	Gpr107-001	G protein-coupled receptor 107 [Source:MGI Symbol;Acc:MGI:2139054]	genic	3.49866
2	31245395	31247395	Ncs1-001	neuronal calcium sensor 1 [Source:MGI Symbol;Acc:MGI:109166]	genic	0.714536
2	32161604	32163604	Prrc2b-001	proline-rich coiled-coil 2B [Source:MGI Symbol;Acc:MGI:1923304]	10522	9.77078
2	32173514	32175514	Prrc2b-001	proline-rich coiled-coil 2B [Source:MGI Symbol;Acc:MGI:1923304]	genic	0.23188
2	33438918	33440918	Zbtb34-001	zinc finger and BTB domain containing 34 [Source:MGI Symbol;Acc:MGI:2685195]	7594	1.87378
2	38667913	38669913	Nek6-001	NIMA (never in mitosis gene a)-related expressed kinase 6 [Source:MGI Symbol;Acc:MGI:1891638]	23826	97.8512
2	40910076	40912076	Ppp6c-001	protein phosphatase 6, catalytic subunit [Source:MGI Symbol;Acc:MGI:1915107]	1683625	8.13971
2	60049852	60051852	Baz2b-001	bromodomain adjacent to zinc finger domain, 2B [Source:MGI Symbol;Acc:MGI:2442782]	genic	2.30441
2	70277894	70279894	Sp5-001	trans-acting transcription factor 5 [Source:MGI Symbol;Acc:MGI:1927715]	195029	0.153474
2	71865764	71867764	Pdk1-001	pyruvate dehydrogenase kinase, isoenzyme 1 [Source:MGI Symbol;Acc:MGI:1926119]	5460	6.58761
2	72514857	72516857	Cdca7-001	cell division cycle associated 7 [Source:MGI Symbol;Acc:MGI:1914203]	27964	31.6161
2	75873165	75875165	Agps-001	alkylglycerone phosphate synthase [Source:MGI Symbol;Acc:MGI:2443065]	genic	4.93169
2	80638152	80640152	Dusp19-001	dual specificity phosphatase 19 [Source:MGI Symbol;Acc:MGI:1915332]	genic	10.0084
2	90846072	90848072	Mtch2-001	mitochondrial carrier homolog 2 (C. elegans) [Source:MGI Symbol;Acc:MGI:1929260]	genic	10.4565
2	92143135	92145135	Gm13780-001	predicted gene 13780 [Source:MGI Symbol;Acc:MGI:3650707]	genic	2.38761
2	102120670	102122670	Ldlrad3-001	low density lipoprotein receptor class A domain containing 3 [Source:MGI Symbol;Acc:MGI:2138856]	genic	2.32209
2	119236166	119238166	Spint1-001	serine protease inhibitor, Kunitz type 1 [Source:MGI Symbol;Acc:MGI:1338033]	genic	6.88142
2	119789216	119791216	Rpap1-006	RNA polymerase II associated protein 1 [Source:MGI Symbol;Acc:MGI:1916175]	1679	6.03135
2	122369457	122371457	Shf-001	Src homology 2 domain containing F [Source:MGI Symbol;Acc:MGI:3613669]	295	2.89216
2	129797578	129799578	Stk35-002	serine/threonine kinase 35 [Source:MGI Symbol;Acc:MGI:1914583]	939	8.56772
2	130696800	130698800	Slc4a11-001	solute carrier family 4, sodium bicarbonate transporter-like, member 11 [Source:MGI Symbol;Acc:MGI:2138987]	genic	0.734789
2	131846770	131848770	Prnp-001	prion protein [Source:MGI Symbol;Acc:MGI:97769]	61158	0.13486
2	132577304	132579304	Gpcpd1-007	glycerophosphocholine phosphodiesterase GDE1 homolog (S. cerevisiae) [Source:MGI Symbol;Acc:MGI:104898]	genic	0.784265
2	132700914	132702914	1110034G24Rik-001	RIKEN cDNA 1110034G24 gene [Source:MGI Symbol;Acc:MGI:1920997]	genic	1.21793
2	144714369	144716369	Dtd1-001	D-tyrosyl-tRNA deacylase 1 homolog (S. cerevisiae) [Source:MGI Symbol;Acc:MGI:1913294]	genic	3.88929
2	146630208	146632208	Ralgapa2-001	Ral GTPase activating protein, alpha subunit 2 (catalytic) [Source:MGI Symbol;Acc:MGI:3036245]	118182	0.846668
2	146833482	146835482	Plk1s1-001	polo-like kinase 1 substrate 1 [Source:MGI Symbol;Acc:MGI:2684960]	20382	2.11478
2	148874075	148876075	Cst3-001	cystatin C [Source:MGI Symbol;Acc:MGI:102519]	genic	59.9665
2	149982328	149984328	Tmem90b-002	transmembrane protein 90B [Source:MGI Symbol;Acc:MGI:3702158]	genic	1.34987
2	153167280	153169280	Tm9sf4-001	transmembrane 9 superfamily protein member 4 [Source:MGI Symbol;Acc:MGI:2139220]	genic	3.34669
2	155381018	155383018	Trp53inp2-003	transformation related protein 53 inducible nuclear protein 2 [Source:MGI Symbol;Acc:MGI:1915978]	genic	1.49559
2	160110477	160112477	Gm14221-001	predicted gene 14221 [Source:MGI Symbol;Acc:MGI:3650696]	470880	0.103253
2	165980604	165982604	Gm11463-001	predicted gene 11463 [Source:MGI Symbol;Acc:MGI:3650001]	genic	0.126353
2	166193519	166195519	Ncoa3-201	nuclear receptor coactivator 3 [Source:MGI Symbol;Acc:MGI:1276535]	37856	9.1331
2	167071479	167073479	Znfx1-001	zinc finger, NFX1-type containing 1 [Source:MGI Symbol;Acc:MGI:2138982]	5617	20.5456
2	168114220	168116220	Pard6b-001	par-6 (partitioning defective 6) homolog beta (C. elegans) [Source:MGI Symbol;Acc:MGI:2135605]	13017	2.05861
2	168213296	168215296	Gm20716-001	predicted gene 20716 [Source:MGI Symbol;Acc:MGI:5313163]	genic	2.23447
2	170771364	170773364	Dok5-001	docking protein 5 [Source:MGI Symbol;Acc:MGI:1924079]	genic	0.187091
2	172515766	172517766	Tfap2c-001	transcription factor AP-2, gamma [Source:MGI Symbol;Acc:MGI:106032]	31827	5.99858
2	172576373	172578373	Tfap2c-001	transcription factor AP-2, gamma [Source:MGI Symbol;Acc:MGI:106032]	17751	5.99858
2	180726845	180728845	Slc17a9-001	solute carrier family 17, member 9 [Source:MGI Symbol;Acc:MGI:1919107]	genic	3.77955
3	9243267	9245267	Zbtb10-001	zinc finger and BTB domain containing 10 [Source:MGI Symbol;Acc:MGI:2139883]	5335	2.48701
3	18623094	18625094	Cyp7b1-201	cytochrome P450, family 7, subfamily b, polypeptide 1 [Source:MGI Symbol;Acc:MGI:104978]	379756	0.203618
3	30723466	30725466	Lrrc31-003	leucine rich repeat containing 31 [Source:MGI Symbol;Acc:MGI:2443864]	23623	1.34469
3	34667639	34669639	Sox2ot-006	SOX2 overlapping transcript (non-protein coding) [Source:MGI Symbol;Acc:MGI:2444112]	genic	0.0982561
3	51127719	51129719	Ccrn4l-001	CCR4 carbon catabolite repression 4-like (S. cerevisiae) [Source:MGI Symbol;Acc:MGI:109382]	94728	0.646177
3	52253254	52255254	Foxo1-001	forkhead box O1 [Source:MGI Symbol;Acc:MGI:1890077]	13083	2.11426
3	52400192	52402192	Foxo1-001	forkhead box O1 [Source:MGI Symbol;Acc:MGI:1890077]	50083	2.11426
3	53649451	53651451	Frem2-201	Fras1 related extracellular matrix protein 2 [Source:MGI Symbol;Acc:MGI:2444465]	genic	0.595564
3	54989250	54991250	Ccna1-201	cyclin A1 [Source:MGI Symbol;Acc:MGI:108042]	54219	0.471193
3	68564160	68566160	Schip1-201	schwannomin interacting protein 1 [Source:MGI Symbol;Acc:MGI:1353557]	genic	15.3952
3	84180716	84182716	Trim2-001	tripartite motif-containing 2 [Source:MGI Symbol;Acc:MGI:1933163]	genic	0.811682
3	96674812	96676812	Ankrd35-001	ankyrin repeat domain 35 [Source:MGI Symbol;Acc:MGI:2442590]	genic	0.487546
3	101162621	101164621	Ptgfrn-001	prostaglandin F2 receptor negative regulator [Source:MGI Symbol;Acc:MGI:1277114]	52343	9.48884
3	103085182	103087182	Ampd1-001	adenosine monophosphate deaminase 1 [Source:MGI Symbol;Acc:MGI:88015]	genic	0.124856
3	103145480	103147480	Dennd2c-003	DENN/MADD domain containing 2C [Source:MGI Symbol;Acc:MGI:3036254]	genic	7.07902
3	104814531	104816531	Mov10-001	Moloney leukemia virus 10 [Source:MGI Symbol;Acc:MGI:97054]	genic	22.3615
3	108432657	108434657	Sars-001	seryl-aminoacyl-tRNA synthetase [Source:MGI Symbol;Acc:MGI:102809]	genic	38.9757
3	133523880	133525880	Tet2-201	tet methylcytosine dioxygenase 2 [Source:MGI Symbol;Acc:MGI:2443298]	genic	5.36109
3	137832590	137834590	H2afz-001	H2A histone family, member Z [Source:MGI Symbol;Acc:MGI:1888388]	29897	253.517
3	138814348	138816348	Tspan5-001	tetraspanin 5 [Source:MGI Symbol;Acc:MGI:1928096]	genic	3.30641
3	144412201	144414201	Hs2st1-001	heparan sulfate 2-O-sulfotransferase 1 [Source:MGI Symbol;Acc:MGI:1346049]	16902	2.57929
3	147180859	147182859	Gm10288-201	predicted gene 10288 [Source:MGI Symbol;Acc:MGI:3704227]	341494	0.631446
3	152164696	152166696	Gipc2-002	GIPC PDZ domain containing family, member 2 [Source:MGI Symbol;Acc:MGI:1889209]	genic	0.227182
3	153675043	153677043	St6galnac3-201	ST6 euraminyl-2,3-beta-galactosyl-1,3)-N-acetylgalactosaminide alpha-2,6-sialyltransferase 3 [Source:MGI Symbol;Acc:MGI:1341828]	genic	0.702169
4	10398819	10400819	2610301B20Rik-201	RIKEN cDNA 2610301B20 gene [Source:MGI Symbol;Acc:MGI:1914407]	473679	2.42986
4	10931488	10933488	2610301B20Rik-201	RIKEN cDNA 2610301B20 gene [Source:MGI Symbol;Acc:MGI:1914407]	32063	2.42986
4	33823036	33825036	Rngtt-002	RNA guanylyltransferase and 5'-phosphatase [Source:MGI Symbol;Acc:MGI:1329041]	320422	2.36128
4	55463361	55465361	Gm12510-001	predicted gene 12510 [Source:MGI Symbol;Acc:MGI:3651360]	genic	0.281154
4	57689980	57691980	Palm2-003	paralemmin 2 [Source:MGI Symbol;Acc:MGI:1934601]	genic	2.63993
4	57780012	57782012	Palm2-003	paralemmin 2 [Source:MGI Symbol;Acc:MGI:1934601]	genic	2.63993
4	57841105	57843105	Palm2-003	paralemmin 2 [Source:MGI Symbol;Acc:MGI:1934601]	genic	2.63993
4	57919485	57921485	D630039A03Rik-001	RIKEN cDNA D630039A03 gene [Source:MGI Symbol;Acc:MGI:2442889]	3188	0.284713
4	86182813	86184813	Fam154a-001	family with sequence similarity 154, member A [Source:MGI Symbol;Acc:MGI:1923061]	259828	0.13524
4	99635182	99637182	Gm12688-001	predicted gene 12688 [Source:MGI Symbol;Acc:MGI:3650434]	16425	0.93163
4	105223195	105225195	Ppap2b-001	phosphatidic acid phosphatase type 2B [Source:MGI Symbol;Acc:MGI:1915166]	genic	2.82984
4	106858711	106860711	Ssbp3-005	single-stranded DNA binding protein 3 [Source:MGI Symbol;Acc:MGI:1919725]	49990	1.82464
4	108218094	108220094	Zyg11a-001	zyg-11 homolog A (C. elegans) [Source:MGI Symbol;Acc:MGI:2446208]	172	10.9206
4	115831130	115833130	Mob3c-001	MOB kinase activator 3C [Source:MGI Symbol;Acc:MGI:2140623]	genic	0.507462
4	117151896	117153896	Rps8-001	ribosomal protein S8 [Source:MGI Symbol;Acc:MGI:98166]	genic	428.555
4	117372923	117374923	Rnf220-001	ring finger protein 220 [Source:MGI Symbol;Acc:MGI:1913993]	genic	7.56046
4	117483846	117485846	Rnf220-001	ring finger protein 220 [Source:MGI Symbol;Acc:MGI:1913993]	genic	7.56046
4	118740404	118742404	Ebna1bp2-001	EBNA1 binding protein 2 [Source:MGI Symbol;Acc:MGI:1916322]	112628	15.1487
4	119025745	119027745	Gm12861-001	predicted gene 12861 [Source:MGI Symbol;Acc:MGI:3651891]	28547	0.130084
4	127198106	127200106	Dlgap3-001	discs, large (Drosophila) homolog-associated protein 3 [Source:MGI Symbol;Acc:MGI:3039563]	28902	1.48393
4	127344234	127346234	Gjb4-001	gap junction protein, beta 4 [Source:MGI Symbol;Acc:MGI:95722]	4852	0.287408
4	129749590	129751590	Khdrbs1-001	KH domain containing, RNA binding, signal transduction associated 1 [Source:MGI Symbol;Acc:MGI:893579]	7287	8.87786
4	129969364	129971364	1700003M07Rik-001	RIKEN cDNA 1700003M07 gene [Source:MGI Symbol;Acc:MGI:1919475]	5707	0.194306
4	133121419	133123419	Wasf2-001	WAS protein family, member 2 [Source:MGI Symbol;Acc:MGI:1098641]	7086	6.94998
4	136145950	136147950	Id3-001	inhibitor of DNA binding 3 [Source:MGI Symbol;Acc:MGI:96398]	195	2.8461
4	136316755	136318755	Hnrnpr-003	heterogeneous nuclear ribonucleoprotein R [Source:MGI Symbol;Acc:MGI:1891692]	genic	17.6054
4	137047672	137049672	Zbtb40-001	zinc finger and BTB domain containing 40 [Source:MGI Symbol;Acc:MGI:2682254]	genic	0.678676
4	137469402	137471402	Hspg2-001	perlecan (heparan sulfate proteoglycan 2) [Source:MGI Symbol;Acc:MGI:96257]	genic	2.51
4	137596396	137598396	Usp48-005	ubiquitin specific peptidase 48 [Source:MGI Symbol;Acc:MGI:2158502]	genic	23.3078
4	137777114	137779114	Alpl-001	alkaline phosphatase, liver/bone/kidney [Source:MGI Symbol;Acc:MGI:87983]	genic	26.2898
4	138444149	138446149	Mul1-001	mitochondrial ubiquitin ligase activator of NFKB 1 [Source:MGI Symbol;Acc:MGI:1915600]	1884	3.46468
4	138793560	138795560	Pla2g5-001	phospholipase A2, group V [Source:MGI Symbol;Acc:MGI:101899]	3684	0.64405
4	141425063	141427063	Hspb7-001	heat shock protein family, member 7 (cardiovascular) [Source:MGI Symbol;Acc:MGI:1352494]	genic	0.128646
4	143227205	143229205	Prdm2-001	PR domain containing 2, with ZNF domain [Source:MGI Symbol;Acc:MGI:107628]	14210	2.97651
4	148737810	148739810	Gm13203-001	predicted gene 13203 [Source:MGI Symbol;Acc:MGI:3651445]	21229	0.146795
4	155162480	155164480	Ski-002	ski sarcoma viral oncogene homolog (avian) [Source:MGI Symbol;Acc:MGI:98310]	60112	4.47404
4	155188925	155190925	Ski-002	ski sarcoma viral oncogene homolog (avian) [Source:MGI Symbol;Acc:MGI:98310]	genic	4.47404
5	4302832	4304832	Gm9897-001	predicted gene 9897 [Source:MGI Symbol;Acc:MGI:3704243]	105181	1.30198
5	12872096	12874096	Sema3e-002	sema domain, immunoglobulin domain (Ig), short basic domain, secreted, (semaphorin) 3E [Source:MGI Symbol;Acc:MGI:1340034]	1151180	0.148798
5	18687651	18689651	Gnai1-201	guanine nucleotide binding protein (G protein), alpha inhibiting 1 [Source:MGI Symbol;Acc:MGI:95771]	327238	1.87267
5	21825685	21827685	Slc26a5-002	solute carrier family 26, member 5 [Source:MGI Symbol;Acc:MGI:1933154]	genic	0.218111
5	22573343	22575343	Orc5-002	origin recognition complex, subunit 5 [Source:MGI Symbol;Acc:MGI:1347044]	22914	14.9724
5	24598032	24600032	Chpf2-001	chondroitin polymerizing factor 2 [Source:MGI Symbol;Acc:MGI:1917522]	genic	0.382552
5	30154367	30156367	Fam59b-001	family with sequence similarity 59, member B [Source:MGI Symbol;Acc:MGI:2685290]	genic	12.353
5	35770321	35772321	Ablim2-002	actin-binding LIM protein 2 [Source:MGI Symbol;Acc:MGI:2385758]	genic	0.210622
5	37245507	37247507	Crmp1-202	collapsin response mediator protein 1 [Source:MGI Symbol;Acc:MGI:107793]	genic	0.545166
5	43868241	43870241	Cd38-001	CD38 antigen [Source:MGI Symbol;Acc:MGI:107474]	genic	1.846
5	72464104	72466104	Nfxl1-001	nuclear transcription factor, X-box binding-like 1 [Source:MGI Symbol;Acc:MGI:1923646]	47197	1.5518
5	72901448	72903448	Slain2-001	SLAIN motif family, member 2 [Source:MGI Symbol;Acc:MGI:1923241]	10856	5.58269
5	75084328	75086328	Chic2-001	cysteine-rich hydrophobic domain 2 [Source:MGI Symbol;Acc:MGI:1921527]	39554	1.81583
5	75517342	75519342	Kit-001	kit oncogene [Source:MGI Symbol;Acc:MGI:96677]	55574	12.5746
5	86406462	86408462	Tmprss11d-001	transmembrane protease, serine 11d [Source:MGI Symbol;Acc:MGI:2385221]	33042	0.324577
5	88678843	88680843	Grsf1-001	G-rich RNA sequence binding factor 1 [Source:MGI Symbol;Acc:MGI:106479]	2672	25.4779
5	92111597	92113597	Uso1-201	USO1 homolog, vesicle docking protein (yeast) [Source:MGI Symbol;Acc:MGI:1929095]	24341	6.34206
5	92497419	92499419	Scarb2-201	scavenger receptor class B, member 2 [Source:MGI Symbol;Acc:MGI:1196458]	genic	11.6811
5	97202902	97204902	Bmp2k-001	BMP2 inducible kinase [Source:MGI Symbol;Acc:MGI:2155456]	91306	0.311637
5	100043019	100045019	Enoph1-202	enolase-phosphatase 1 [Source:MGI Symbol;Acc:MGI:1915120]	genic	22.7179
5	100466591	100468591	Lin54-006	lin-54 homolog (C. elegans) [Source:MGI Symbol;Acc:MGI:2140902]	genic	2.03584
5	101712486	101714486	Cds1-001	CDP-diacylglycerol synthase 1 [Source:MGI Symbol;Acc:MGI:1921846]	50644	1.95295
5	101847096	101849096	Wdfy3-001	WD repeat and FYVE domain containing 3 [Source:MGI Symbol;Acc:MGI:1096875]	genic	0.253874
5	103734711	103736711	Aff1-003	AF4/FMR2 family, member 1 [Source:MGI Symbol;Acc:MGI:1100819]	genic	6.61264
5	104433181	104435181	Spp1-001	secreted phosphoprotein 1 [Source:MGI Symbol;Acc:MGI:98389]	genic	48.7581
5	110226781	110228781	Golga3-001	golgi autoantigen, golgin subfamily a, 3 [Source:MGI Symbol;Acc:MGI:96958]	311	2.19216
5	110436893	110438893	Fbrsl1-202	fibrosin-like 1 [Source:MGI Symbol;Acc:MGI:1920907]	genic	1.56016
5	110803181	110805181	Ulk1-201	Unc-51 like kinase 1 (C. elegans) [Source:MGI Symbol;Acc:MGI:1270126]	genic	10.6112
5	113333987	113335987	Sgsm1-001	small G protein signaling modulator 1 [Source:MGI Symbol;Acc:MGI:107320]	23201	0.619127
5	113663773	113665773	Cmklr1-001	chemokine-like receptor 1 [Source:MGI Symbol;Acc:MGI:109603]	13347	1.53552
5	114570714	114572714	BC057022-001	cDNA sequence BC057022 [Source:MGI Symbol;Acc:MGI:3605543]	genic	0.326729
5	116452507	116454507	2410137F16Rik-001	RIKEN cDNA 2410137F16 gene [Source:MGI Symbol;Acc:MGI:1924048]	genic	0.445538
5	117395818	117397818	Gm15728-001	predicted gene 15728 [Source:MGI Symbol;Acc:MGI:3783171]	2320	0.16196
5	119054654	119056654	Med13l-201	mediator complex subunit 13-like [Source:MGI Symbol;Acc:MGI:2670178]	289219	2.7298
5	119309411	119311411	Gm2301-003	predicted gene 2301 [Source:MGI Symbol;Acc:MGI:3780472]	359258	12.1381
5	119578954	119580954	Gm2301-003	predicted gene 2301 [Source:MGI Symbol;Acc:MGI:3780472]	89715	12.1381
5	119584146	119586146	Gm2301-003	predicted gene 2301 [Source:MGI Symbol;Acc:MGI:3780472]	84523	12.1381
5	119712016	119714016	Gm16065-001	predicted gene 16065 [Source:MGI Symbol;Acc:MGI:3801954]	20798	0.239625
5	122452331	122454331	Anapc7-001	anaphase promoting complex subunit 7 [Source:MGI Symbol;Acc:MGI:1929711]	genic	35.461
5	127687891	127689891	Slc15a4-006	solute carrier family 15, member 4 [Source:MGI Symbol;Acc:MGI:2140796]	genic	3.81418
5	128599785	128601785	5930412G12Rik-001	RIKEN cDNA 5930412G12 gene [Source:MGI Symbol;Acc:MGI:2442398]	genic	0.222407
5	129216694	129218694	Gpr133-001	G protein-coupled receptor 133 [Source:MGI Symbol;Acc:MGI:3041203]	12095	0.399559
5	129269205	129271205	Gpr133-001	G protein-coupled receptor 133 [Source:MGI Symbol;Acc:MGI:3041203]	64606	0.399559
5	131490123	131492123	Auts2-001	autism susceptibility candidate 2 [Source:MGI Symbol;Acc:MGI:1919847]	genic	0.358829
5	134332066	134334066	Gtf2i-001	general transcription factor II I [Source:MGI Symbol;Acc:MGI:1202722]	17306	5.85483
5	136101258	136103258	Rasa4-001	RAS p21 protein activator 4 [Source:MGI Symbol;Acc:MGI:1858600]	genic	1.36586
5	137348912	137350912	Ephb4-001	Eph receptor B4 [Source:MGI Symbol;Acc:MGI:104757]	genic	3.68322
5	138990726	138992726	Pdgfa-001	platelet derived growth factor, alpha [Source:MGI Symbol;Acc:MGI:97527]	genic	3.8913
5	142667513	142669513	Wipi2-001	WD repeat domain, phosphoinositide interacting 2 [Source:MGI Symbol;Acc:MGI:1923831]	genic	6.54806
5	142799853	142801853	Tnrc18-003	trinucleotide repeat containing 18 [Source:MGI Symbol;Acc:MGI:3648294]	genic	0.867871
6	4676662	4678662	Sgce-001	sarcoglycan, epsilon [Source:MGI Symbol;Acc:MGI:1329042]	genic	0.55517
6	4737900	4739900	Sgce-001	sarcoglycan, epsilon [Source:MGI Symbol;Acc:MGI:1329042]	genic	0.55517
6	5118339	5120339	Ppp1r9a-002	protein phosphatase 1, regulatory (inhibitor) subunit 9A [Source:MGI Symbol;Acc:MGI:2442401]	genic	0.768124
6	7752112	7754112	Asns-001	asparagine synthetase [Source:MGI Symbol;Acc:MGI:1350929]	58858	166.221
6	25032281	25034281	Wasl-001	Wiskott-Aldrich syndrome-like (human) [Source:MGI Symbol;Acc:MGI:1920428]	367272	4.36391
6	31896195	31898195	Podxl-001	podocalyxin-like [Source:MGI Symbol;Acc:MGI:1351317]	332214	2.47119
6	54095697	54097697	Chn2-008	chimerin (chimaerin) 2 [Source:MGI Symbol;Acc:MGI:1917243]	genic	0.48571
6	55791064	55793064	Adcyap1r1-001	adenylate cyclase activating polypeptide 1 receptor 1 [Source:MGI Symbol;Acc:MGI:108449]	289613	0.146476
6	67110784	67112784	Gadd45a-001	growth arrest and DNA-damage-inducible 45 alpha [Source:MGI Symbol;Acc:MGI:107799]	30130	0.0860035
6	87912728	87914728	Copg-001	coatomer protein complex, subunit gamma [Source:MGI Symbol;Acc:MGI:1858696]	genic	7.72782
6	91700311	91702311	Slc6a6-201	solute carrier family 6 (neurotransmitter transporter, taurine), member 6 [Source:MGI Symbol;Acc:MGI:98488]	16244	16.0514
6	91709652	91711652	Slc6a6-201	solute carrier family 6 (neurotransmitter transporter, taurine), member 6 [Source:MGI Symbol;Acc:MGI:98488]	genic	16.0514
6	92245524	92247524	Trh-001	thyrotropin releasing hormone [Source:MGI Symbol;Acc:MGI:98823]	874	21.4672
6	92494642	92496642	Prickle2-201	prickle homolog 2 (Drosophila) [Source:MGI Symbol;Acc:MGI:1925144]	genic	0.818981
6	97101506	97103506	Eogt-001	EGF domain-specific O-linked N-acetylglucosamine (GlcNAc) transferase [Source:MGI Symbol;Acc:MGI:2141669]	6518	0.957194
6	97147987	97149987	Eogt-001	EGF domain-specific O-linked N-acetylglucosamine (GlcNAc) transferase [Source:MGI Symbol;Acc:MGI:2141669]	genic	0.957194
6	101978383	101980383	Pdzrn3-001	PDZ domain containing RING finger 3 [Source:MGI Symbol;Acc:MGI:1933157]	600486	0.402098
6	112949437	112951437	Srgap3-001	SLIT-ROBO Rho GTPase activating protein 3 [Source:MGI Symbol;Acc:MGI:2152938]	2171	0.787712
6	115650048	115652048	Mkrn2-201	makorin, ring finger protein, 2 [Source:MGI Symbol;Acc:MGI:1914277]	genic	11.4233
6	122662004	122664004	Dppa3-001	developmental pluripotency-associated 3 [Source:MGI Symbol;Acc:MGI:1920958]	35594	23.5712
6	122706443	122708443	Nanog-003	Nanog homeobox [Source:MGI Symbol;Acc:MGI:1919200]	1046	99.1144
6	125432832	125434832	Cd9-001	CD9 antigen [Source:MGI Symbol;Acc:MGI:88348]	25434	48.9054
6	125503805	125505805	Cd9-001	CD9 antigen [Source:MGI Symbol;Acc:MGI:88348]	9014	48.9054
6	125591014	125593014	Vwf-004	Von Willebrand factor homolog [Source:MGI Symbol;Acc:MGI:98941]	genic	0.149418
6	127335869	127337869	Parp11-002	poly (ADP-ribose) polymerase family, member 11 [Source:MGI Symbol;Acc:MGI:2141505]	108971	0.36328
6	133962435	133964435	Etv6-001	ets variant gene 6 (TEL oncogene) [Source:MGI Symbol;Acc:MGI:109336]	71265	2.04417
6	140602665	140604665	Plekha5-201	pleckstrin homology domain containing, family A member 5 [Source:MGI Symbol;Acc:MGI:1923802]	7759	3.07335
6	144360511	144362511	Bcat1-001	branched chain aminotransferase 1, cytosolic [Source:MGI Symbol;Acc:MGI:104861]	631324	33.2153
6	144453464	144455464	Bcat1-001	branched chain aminotransferase 1, cytosolic [Source:MGI Symbol;Acc:MGI:104861]	538371	33.2153
6	145175571	145177571	Lrmp-003	lymphoid-restricted membrane protein [Source:MGI Symbol;Acc:MGI:108424]	637	1.59835
6	145275299	145277299	Gm15706-001	predicted gene 15706 [Source:MGI Symbol;Acc:MGI:3783146]	23450	0.622666
6	149130346	149132346	4833442J19Rik-006	RIKEN cDNA 4833442J19 gene [Source:MGI Symbol;Acc:MGI:2443575]	7503	1.07717
7	3346952	3348952	Cacng7-201	calcium channel, voltage-dependent, gamma subunit 7 [Source:MGI Symbol;Acc:MGI:1932374]	genic	1.04145
7	16780191	16782191	Slc1a5-001	solute carrier family 1 (neutral amino acid transporter), member 5 [Source:MGI Symbol;Acc:MGI:105305]	genic	10.5447
7	24516316	24518316	Zfp428-003	zinc finger protein 428 [Source:MGI Symbol;Acc:MGI:1916463]	634	16.4831
7	25263221	25265221	Cic-001	capicua homolog (Drosophila) [Source:MGI Symbol;Acc:MGI:1918972]	2483	1.52591
7	25668217	25670217	Exosc5-201	exosome component 5 [Source:MGI Symbol;Acc:MGI:107889]	186	28.3512
7	28378428	28380428	Zfp36-001	zinc finger protein 36 [Source:MGI Symbol;Acc:MGI:99180]	genic	0.92766
7	30265168	30267168	Wdr62-003	WD repeat domain 62 [Source:MGI Symbol;Acc:MGI:1923696]	genic	3.47352
7	34569843	34571843	Kctd15-001	potassium channel tetramerisation domain containing 15 [Source:MGI Symbol;Acc:MGI:2385276]	67171	1.82617
7	34668553	34670553	Chst8-001	carbohydrate (N-acetylgalactosamine 4-0) sulfotransferase 8 [Source:MGI Symbol;Acc:MGI:1916197]	3915	0.645164
7	37474670	37476670	Zfp536-002	zinc finger protein 536 [Source:MGI Symbol;Acc:MGI:1926102]	genic	0.102762
7	44374485	44376485	1700008O03Rik-001	RIKEN cDNA 1700008O03 gene [Source:MGI Symbol;Acc:MGI:1916599]	genic	0.237712
7	65872634	65874634	Gm20684-001	predicted gene 20684 [Source:MGI Symbol;Acc:MGI:5313131]	genic	8.35286
7	70788279	70790279	Mctp2-201	multiple C2 domains, transmembrane 2 [Source:MGI Symbol;Acc:MGI:2685335]	1287553	0.329761
7	73398568	73400568	Rgma-001	RGM domain family, member A [Source:MGI Symbol;Acc:MGI:2679262]	genic	0.127827
7	79210610	79212610	Abhd2-001	abhydrolase domain containing 2 [Source:MGI Symbol;Acc:MGI:1914344]	60591	3.67388
7	96204031	96206031	Odz4-001	odd Oz/ten-m homolog 4 (Drosophila) [Source:MGI Symbol;Acc:MGI:2447063]	genic	0.813866
7	96654479	96656479	Odz4-001	odd Oz/ten-m homolog 4 (Drosophila) [Source:MGI Symbol;Acc:MGI:2447063]	genic	0.813866
7	112687716	112689716	2310014F06Rik-001	RIKEN cDNA 2310014F06 gene [Source:MGI Symbol;Acc:MGI:1916875]	genic	3.85164
7	116285638	116287638	Rps13-201	ribosomal protein S13 [Source:MGI Symbol;Acc:MGI:1915302]	43869	684.055
7	130251291	130253291	Fgfr2-007	fibroblast growth factor receptor 2 [Source:MGI Symbol;Acc:MGI:95523]	genic	8.54419
7	130263841	130265841	Fgfr2-007	fibroblast growth factor receptor 2 [Source:MGI Symbol;Acc:MGI:95523]	genic	8.54419
7	134021351	134023351	Dhx32-002	DEAH (Asp-Glu-Ala-His) box polypeptide 32 [Source:MGI Symbol;Acc:MGI:2141813]	139819	0.0753732
7	134770601	134772601	Dock1-201	dedicator of cytokinesis 1 [Source:MGI Symbol;Acc:MGI:2429765]	genic	4.01832
7	139944735	139946735	Utf1-001	undifferentiated embryonic cell transcription factor 1 [Source:MGI Symbol;Acc:MGI:1276125]	946	49.6515
7	144863525	144865525	Fgf4-201	fibroblast growth factor 4 [Source:MGI Symbol;Acc:MGI:95518]	2139	38.7964
7	144887969	144889969	Fgf15-201	fibroblast growth factor 15 [Source:MGI Symbol;Acc:MGI:1096383]	6563	2.47083
7	145138265	145140265	Tpcn2-201	two pore segment channel 2 [Source:MGI Symbol;Acc:MGI:2385297]	113658	0.510229
8	8483823	8485823	Efnb2-001	ephrin B2 [Source:MGI Symbol;Acc:MGI:105097]	131611	0.921898
8	12501472	12503472	Spaca7-201	sperm acrosome associated 7 [Source:MGI Symbol;Acc:MGI:1925884]	71577	0.133742
8	12544770	12546770	Spaca7-201	sperm acrosome associated 7 [Source:MGI Symbol;Acc:MGI:1925884]	26279	0.133742
8	14013910	14015910	Erich1-201	glutamate-rich 1 [Source:MGI Symbol;Acc:MGI:3588201]	11655	3.8513
8	27235391	27237391	Adrb3-001	adrenergic receptor, beta 3 [Source:MGI Symbol;Acc:MGI:87939]	5803	2.50076
8	27239760	27241760	Adrb3-001	adrenergic receptor, beta 3 [Source:MGI Symbol;Acc:MGI:87939]	10172	2.50076
8	40962312	40964312	Mtus1-201	mitochondrial tumor suppressor 1 [Source:MGI Symbol;Acc:MGI:2142572]	26602	1.81193
8	44978477	44980477	Fat1-201	FAT tumor suppressor homolog 1 (Drosophila) [Source:MGI Symbol;Acc:MGI:109168]	genic	8.93433
8	46445104	46447104	Acsl1-001	acyl-CoA synthetase long-chain family member 1 [Source:MGI Symbol;Acc:MGI:102797]	23937	4.52393
8	57731992	57733992	Galnt7-001	UDP-N-acetyl-alpha-D-galactosamine: polypeptide N-acetylgalactosaminyltransferase 7 [Source:MGI Symbol;Acc:MGI:1349449]	78960	2.49293
8	61590280	61592280	Palld-001	palladin, cytoskeletal associated protein [Source:MGI Symbol;Acc:MGI:1919583]	genic	0.463135
8	71590858	71592858	Pgls-001	6-phosphogluconolactonase [Source:MGI Symbol;Acc:MGI:1913421]	genic	5.3521
8	78067364	78069364	Pou4f2-001	POU domain, class 4, transcription factor 2 [Source:MGI Symbol;Acc:MGI:102524]	363645	0.140255
8	83775835	83777835	Ddx39-001	DEAD (Asp-Glu-Ala-Asp) box polypeptide 39 [Source:MGI Symbol;Acc:MGI:1915528]	34509	3.47657
8	84649359	84651359	Cacna1a-003	calcium channel, voltage-dependent, P/Q type, alpha 1A subunit [Source:MGI Symbol;Acc:MGI:109482]	9113	0.805212
8	84914583	84916583	Dnase2a-001	deoxyribonuclease II alpha [Source:MGI Symbol;Acc:MGI:1329019]	genic	2.00666
8	85472308	85474308	Gpt2-001	glutamic pyruvate transaminase (alanine aminotransferase) 2 [Source:MGI Symbol;Acc:MGI:1915391]	18268	4.97345
8	86774716	86776716	Siah1a-201	seven in absentia 1A [Source:MGI Symbol;Acc:MGI:108064]	28710	4.6171
8	88626979	88628979	Snx20-201	sorting nexin 20 [Source:MGI Symbol;Acc:MGI:1918857]	genic	0.798464
8	88991007	88993007	Sall1-201	sal-like 1 (Drosophila) [Source:MGI Symbol;Acc:MGI:1889585]	34241	7.91463
8	89156190	89158190	Sall1-201	sal-like 1 (Drosophila) [Source:MGI Symbol;Acc:MGI:1889585]	112028	7.91463
8	90827513	90829513	Chd9-202	chromodomain helicase DNA binding protein 9 [Source:MGI Symbol;Acc:MGI:1924001]	genic	0.160028
8	95832640	95834640	Slc38a7-001	solute carrier family 38, member 7 [Source:MGI Symbol;Acc:MGI:2679005]	1280	2.43965
8	106962435	106964435	Sntb2-201	syntrophin, basic 2 [Source:MGI Symbol;Acc:MGI:101771]	genic	2.05948
8	107594116	107596116	Psmd7-201	proteasome (prosome, macropain) 26S subunit, non-ATPase, 7 [Source:MGI Symbol;Acc:MGI:1351511]	5634	47.3668
8	111764767	111766767	Cfdp1-201	craniofacial development protein 1 [Source:MGI Symbol;Acc:MGI:1344403]	1706	53.2203
8	116673124	116675124	Cdyl2-201	chromodomain protein, Y chromosome-like 2 [Source:MGI Symbol;Acc:MGI:1923046]	genic	3.06138
8	125699648	125701648	4933403G14Rik-201	RIKEN cDNA 4933403G14 gene [Source:MGI Symbol;Acc:MGI:1921643]	26283	1.67095
9	7633134	7635134	Gm10709-201	predicted gene 10709 [Source:MGI Symbol;Acc:MGI:3642754]	116538	51.6928
9	8462054	8464054	AK129341-201	cDNA sequence AK129341 [Source:MGI Symbol;Acc:MGI:2680221]	327760	0.251165
9	14173124	14175124	Sesn3-001	sestrin 3 [Source:MGI Symbol;Acc:MGI:1922997]	101177	4.31527
9	15022291	15024291	Panx1-001	pannexin 1 [Source:MGI Symbol;Acc:MGI:1860055]	genic	1.41782
9	21767717	21769717	Kank2-201	KN motif and ankyrin repeat domains 2 [Source:MGI Symbol;Acc:MGI:2384568]	genic	9.19277
9	22130567	22132567	Acp5-203	acid phosphatase 5, tartrate resistant [Source:MGI Symbol;Acc:MGI:87883]	genic	3.30946
9	32094658	32096658	Arhgap32-001	Rho GTPase activating protein 32 [Source:MGI Symbol;Acc:MGI:2450166]	19478	2.86954
9	37656369	37658369	Tbrg1-001	transforming growth factor beta regulated gene 1 [Source:MGI Symbol;Acc:MGI:1100877]	genic	29.5926
9	40782961	40784961	9030425E11Rik-002	RIKEN cDNA 9030425E11 gene [Source:MGI Symbol;Acc:MGI:1918816]	genic	0.862741
9	45348396	45350396	1700003G13Rik-002	RIKEN cDNA 1700003G13 gene [Source:MGI Symbol;Acc:MGI:1919479]	815	0.0914796
9	45501341	45503341	Fxyd2-201	FXYD domain-containing ion transport regulator 2 [Source:MGI Symbol;Acc:MGI:1195260]	91063	0.724682
9	49653025	49655025	Ncam1-202	neural cell adhesion molecule 1 [Source:MGI Symbol;Acc:MGI:97281]	genic	4.88788
9	49750629	49752629	Ncam1-202	neural cell adhesion molecule 1 [Source:MGI Symbol;Acc:MGI:97281]	genic	4.88788
9	49795732	49797732	Ncam1-202	neural cell adhesion molecule 1 [Source:MGI Symbol;Acc:MGI:97281]	genic	4.88788
9	54097778	54099778	Tnfaip8l3-201	tumor necrosis factor, alpha-induced protein 8-like 3 [Source:MGI Symbol;Acc:MGI:2685363]	29367	0.14104
9	56534343	56536343	Hmg20a-201	high mobility group 20A [Source:MGI Symbol;Acc:MGI:1914117]	115699	3.06767
9	58455010	58457010	6030419C18Rik-201	RIKEN cDNA 6030419C18 gene [Source:MGI Symbol;Acc:MGI:2442108]	31593	0.444097
9	71762526	71764526	Cgnl1-003	cingulin-like 1 [Source:MGI Symbol;Acc:MGI:1915428]	genic	2.55828
9	78358837	78360837	Gsta2-001	glutathione S-transferase, alpha 2 (Yc2) [Source:MGI Symbol;Acc:MGI:95863]	3049	0.331476
9	88063499	88065499	Nt5e-201	5' nucleotidase, ecto [Source:MGI Symbol;Acc:MGI:99782]	262110	0.106611
9	88331750	88333750	Nt5e-201	5' nucleotidase, ecto [Source:MGI Symbol;Acc:MGI:99782]	genic	0.106611
9	99419303	99421303	Mras-001	muscle and microspikes RAS [Source:MGI Symbol;Acc:MGI:1100856]	genic	2.23516
9	102999570	103001570	Ryk-003	receptor-like tyrosine kinase [Source:MGI Symbol;Acc:MGI:101766]	91265	8.12383
9	107629760	107631760	Gnai2-201	guanine nucleotide binding protein (G protein), alpha inhibiting 2 [Source:MGI Symbol;Acc:MGI:95772]	genic	19.9005
9	108391843	108393843	Usp4-201	ubiquitin specific peptidase 4 (proto-oncogene) [Source:MGI Symbol;Acc:MGI:98905]	genic	14.8564
9	113457690	113459690	Pdcd6ip-001	programmed cell death 6 interacting protein [Source:MGI Symbol;Acc:MGI:1333753]	192054	1.93023
9	114556588	114558588	Trim71-201	tripartite motif-containing 71 [Source:MGI Symbol;Acc:MGI:2685973]	7781	16.5364
9	114639190	114641190	Cnot10-201	CCR4-NOT transcription complex, subunit 10 [Source:MGI Symbol;Acc:MGI:1926143]	genic	21.1197
9	118862757	118864757	Itga9-001	integrin alpha 9 [Source:MGI Symbol;Acc:MGI:104756]	genic	1.03551
9	120689732	120691732	5830454E08Rik-201	RIKEN cDNA 5830454E08 gene [Source:MGI Symbol;Acc:MGI:1923350]	112386	0.221661
10	4289152	4291152	Akap12-201	A kinase (PRKA) anchor protein (gravin) 12 [Source:MGI Symbol;Acc:MGI:1932576]	genic	66.8207
10	8888484	8890484	Sash1-201	SAM and SH3 domain containing 1 [Source:MGI Symbol;Acc:MGI:1917347]	2414	5.25324
10	12607916	12609916	Utrn-201	utrophin [Source:MGI Symbol;Acc:MGI:104631]	genic	6.08128
10	18422134	18424134	Nhsl1-005	NHS-like 1 [Source:MGI Symbol;Acc:MGI:106390]	genic	0.859193
10	21745251	21747251	1700020N01Rik-201	RIKEN cDNA 1700020N01 gene [Source:MGI Symbol;Acc:MGI:1914942]	123475	0.396683
10	21987563	21989563	Sgk1-002	serum/glucocorticoid regulated kinase 1 [Source:MGI Symbol;Acc:MGI:1340062]	genic	18.2707
10	30736498	30738498	Ncoa7-201	nuclear receptor coactivator 7 [Source:MGI Symbol;Acc:MGI:2444847]	genic	0.559497
10	34233135	34235135	Dse-201	dermatan sulfate epimerase [Source:MGI Symbol;Acc:MGI:2443455]	25584	6.42334
10	40362231	40364231	4930520K10Rik-001	RIKEN cDNA 4930520K10 gene [Source:MGI Symbol;Acc:MGI:1914837]	genic	0.823755
10	41466492	41468492	Zbtb24-201	zinc finger and BTB domain containing 24 [Source:MGI Symbol;Acc:MGI:3039618]	921	3.73388
10	41996908	41998908	Armc2-001	armadillo repeat containing 2 [Source:MGI Symbol;Acc:MGI:1916449]	genic	0.0790565
10	44390980	44392980	Atg5-201	autophagy-related 5 (yeast) [Source:MGI Symbol;Acc:MGI:1277186]	26689	8.96107
10	56373371	56375371	Gja1-201	gap junction protein, alpha 1 [Source:MGI Symbol;Acc:MGI:95713]	1929	5.18721
10	59557575	59559575	Ccdc109a-001	coiled-coil domain containing 109A [Source:MGI Symbol;Acc:MGI:3026965]	genic	1.90026
10	59973501	59975501	Anapc16-201	anaphase promoting complex subunit 16 [Source:MGI Symbol;Acc:MGI:1289325]	12408	6.54116
10	61314776	61316776	X99384-201	cDNA sequence X99384 [Source:MGI Symbol;Acc:MGI:1351623]	2881	9.77532
10	61830627	61832627	Col13a1-006	collagen, type XIII, alpha 1 [Source:MGI Symbol;Acc:MGI:1277201]	5609	0.182338
10	61928299	61930299	Col13a1-006	collagen, type XIII, alpha 1 [Source:MGI Symbol;Acc:MGI:1277201]	genic	0.182338
10	79840051	79842051	E130317F20Rik-001	RIKEN cDNA E130317F20 gene [Source:MGI Symbol;Acc:MGI:3041202]	9330	67.1396
10	84553675	84555675	Ckap4-201	cytoskeleton-associated protein 4 [Source:MGI Symbol;Acc:MGI:2444926]	19639	6.57213
10	84909959	84911959	Ric8b-201	resistance to inhibitors of cholinesterase 8 homolog B (C. elegans) [Source:MGI Symbol;Acc:MGI:2682307]	5657	2.9276
10	85450800	85452800	Btbd11-001	BTB (POZ) domain containing 11 [Source:MGI Symbol;Acc:MGI:1921257]	genic	1.04486
10	88684142	88686142	Spic-001	Spi-C transcription factor (Spi-1/PU.1 related) [Source:MGI Symbol;Acc:MGI:1341168]	genic	1.11069
10	93241400	93243400	Cdk17-201	cyclin-dependent kinase 17 [Source:MGI Symbol;Acc:MGI:97517]	58	4.08591
10	95595009	95597009	Nudt4-201	nudix (nucleoside diphosphate linked moiety X)-type motif 4 [Source:MGI Symbol;Acc:MGI:1918457]	30842	16.6663
10	95882873	95884873	Eea1-201	early endosome antigen 1 [Source:MGI Symbol;Acc:MGI:2442192]	55790	0.769566
10	95891370	95893370	Eea1-201	early endosome antigen 1 [Source:MGI Symbol;Acc:MGI:2442192]	47293	0.769566
10	100065231	100067231	Kitl-001	kit ligand [Source:MGI Symbol;Acc:MGI:96974]	genic	0.185371
10	117952275	117954275	Rap1b-201	RAS related protein 1b [Source:MGI Symbol;Acc:MGI:894315]	106340	27.9377
10	118460316	118462316	Mdm1-202	transformed mouse 3T3 cell double minute 1 [Source:MGI Symbol;Acc:MGI:96951]	291319	2.94117
10	126971024	126973024	Ctdsp2-202	CTD (carboxy-terminal domain, RNA polymerase II, polypeptide A) small phosphatase 2 [Source:MGI Symbol;Acc:MGI:1098748]	5693	14.4143
10	128186353	128188353	Rbms2-201	RNA binding motif, single stranded interacting protein 2 [Source:MGI Symbol;Acc:MGI:1861776]	6056	6.27075
11	3192225	3194225	Sfi1-020	Sfi1 homolog, spindle assembly associated (yeast) [Source:MGI Symbol;Acc:MGI:1926137]	genic	27.376
11	3292035	3294035	Patz1-011	POZ (BTB) and AT hook containing zinc finger 1 [Source:MGI Symbol;Acc:MGI:1891832]	genic	7.76175
11	4301251	4303251	Lif-001	leukemia inhibitory factor [Source:MGI Symbol;Acc:MGI:96787]	28737	0.508888
11	4805284	4807284	Nf2-001	neurofibromatosis 2 [Source:MGI Symbol;Acc:MGI:97307]	genic	14.0997
11	5740359	5742359	Mrps24-004	mitochondrial ribosomal protein S24 [Source:MGI Symbol;Acc:MGI:1928142]	genic	1.95604
11	8568570	8570570	Tns3-001	tensin 3 [Source:MGI Symbol;Acc:MGI:2443012]	genic	5.95265
11	8574900	8576900	Tns3-001	tensin 3 [Source:MGI Symbol;Acc:MGI:2443012]	genic	5.95265
11	8634703	8636703	Tns3-001	tensin 3 [Source:MGI Symbol;Acc:MGI:2443012]	genic	5.95265
11	11880747	11882747	Ddc-001	dopa decarboxylase [Source:MGI Symbol;Acc:MGI:94876]	genic	0.859981
11	12466387	12468387	Cobl-009	cordon-bleu [Source:MGI Symbol;Acc:MGI:105056]	1427	7.33039
11	22829263	22831263	Commd1-004	COMM domain containing 1 [Source:MGI Symbol;Acc:MGI:109474]	3481	2.43002
11	26102923	26104923	Fancl-001	Fanconi anemia, complementation group L [Source:MGI Symbol;Acc:MGI:1914280]	281212	0.528885
11	29713295	29715295	Rtn4-005	reticulon 4 [Source:MGI Symbol;Acc:MGI:1915835]	genic	19.0994
11	34112033	34114033	Dock2-001	dedicator of cyto-kinesis 2 [Source:MGI Symbol;Acc:MGI:2149010]	200789	0.0994847
11	44745941	44747941	Rnf145-006	ring finger protein 145 [Source:MGI Symbol;Acc:MGI:1921565]	180421	6.07188
11	47639743	47641743	Gnb2l1-006	guanine nucleotide binding protein (G protein), beta polypeptide 2 like 1 [Source:MGI Symbol;Acc:MGI:101849]	1158589	236.177
11	49805406	49807406	Gfpt2-002	glutamine fructose-6-phosphate transaminase 2 [Source:MGI Symbol;Acc:MGI:1338883]	genic	4.00181
11	50390443	50392443	Rufy1-001	RUN and FYVE domain containing 1 [Source:MGI Symbol;Acc:MGI:2429762]	genic	2.57758
11	57969854	57971854	Larp1-001	La ribonucleoprotein domain family, member 1 [Source:MGI Symbol;Acc:MGI:1890165]	37210	19.237
11	63270204	63272204	Pmp22-002	peripheral myelin protein 22 [Source:MGI Symbol;Acc:MGI:97631]	110657	0.7206
11	63923574	63925574	Hs3st3b1-001	heparan sulfate (glucosamine) 3-O-sulfotransferase 3B1 [Source:MGI Symbol;Acc:MGI:1333853]	1284	0.112257
11	67017213	67019213	Tmem220-002	transmembrane protein 220 [Source:MGI Symbol;Acc:MGI:2443691]	7941	0.437032
11	68393161	68395161	Ntn1-001	netrin 1 [Source:MGI Symbol;Acc:MGI:105088]	genic	0.145873
11	74648311	74650311	1300001I01Rik-002	RIKEN cDNA 1300001I01 gene [Source:MGI Symbol;Acc:MGI:1921398]	genic	7.24225
11	76286509	76288509	Nxn-001	nucleoredoxin [Source:MGI Symbol;Acc:MGI:109331]	genic	2.75733
11	76319058	76321058	Nxn-001	nucleoredoxin [Source:MGI Symbol;Acc:MGI:109331]	genic	2.75733
11	76350519	76352519	Nxn-001	nucleoredoxin [Source:MGI Symbol;Acc:MGI:109331]	genic	2.75733
11	77737717	77739717	Myo18a-002	myosin XVIIIA [Source:MGI Symbol;Acc:MGI:2667185]	23529	1.41396
11	84276092	84278092	Acaca-005	acetyl-Coenzyme A carboxylase alpha [Source:MGI Symbol;Acc:MGI:108451]	genic	10.6447
11	88689301	88691301	Msi2-001	Musashi homolog 2 (Drosophila) [Source:MGI Symbol;Acc:MGI:1923876]	genic	2.20575
11	95979974	95981974	Igf2bp1-001	insulin-like growth factor 2 mRNA binding protein 1 [Source:MGI Symbol;Acc:MGI:1890357]	genic	29.8849
11	96189329	96191329	Ttll6-003	tubulin tyrosine ligase-like family, member 6 [Source:MGI Symbol;Acc:MGI:2683461]	23878	0.483776
11	100375142	100377142	Jup-003	junction plakoglobin [Source:MGI Symbol;Acc:MGI:96650]	genic	5.11049
11	100938533	100940533	Stat5a-001	signal transducer and activator of transcription 5A [Source:MGI Symbol;Acc:MGI:103036]	genic	0.753156
11	107351845	107353845	Pitpnc1-002	phosphatidylinositol transfer protein, cytoplasmic 1 [Source:MGI Symbol;Acc:MGI:1919045]	genic	1.34816
11	107448349	107450349	Pitpnc1-002	phosphatidylinositol transfer protein, cytoplasmic 1 [Source:MGI Symbol;Acc:MGI:1919045]	22350	1.34816
11	111843253	111845253	2610035D17Rik-002	RIKEN cDNA 2610035D17 gene [Source:MGI Symbol;Acc:MGI:1919636]	1198642	0.123963
11	116970019	116972019	Mgat5b-001	mannoside acetylglucosaminyltransferase 5, isoenzyme B [Source:MGI Symbol;Acc:MGI:3606200]	genic	0.496413
11	117974617	117976617	Socs3-001	suppressor of cytokine signaling 3 [Source:MGI Symbol;Acc:MGI:1201791]	4570	0.613153
11	118007114	118009114	Pgs1-001	phosphatidylglycerophosphate synthase 1 [Source:MGI Symbol;Acc:MGI:1921701]	genic	3.11395
11	119937123	119939123	Baiap2-001	brain-specific angiogenesis inhibitor 1-associated protein 2 [Source:MGI Symbol;Acc:MGI:2137336]	3640	0.903874
11	120662841	120664841	Notum-003	notum pectinacetylesterase homolog (Drosophila) [Source:MGI Symbol;Acc:MGI:1924833]	1026	0.293454
12	4556155	4558155	Itsn2-201	intersectin 2 [Source:MGI Symbol;Acc:MGI:1338049]	34853	1.42798
12	12787421	12789421	Mycn-001	v-myc myelocytomatosis viral related oncogene, neuroblastoma derived (avian) [Source:MGI Symbol;Acc:MGI:97357]	146675	20.6704
12	12802861	12804861	Mycn-001	v-myc myelocytomatosis viral related oncogene, neuroblastoma derived (avian) [Source:MGI Symbol;Acc:MGI:97357]	131235	20.6704
12	41729059	41731059	Immp2l-001	IMP2 inner mitochondrial membrane peptidase-like (S. cerevisiae) [Source:MGI Symbol;Acc:MGI:2135611]	genic	0.61111
12	51520871	51522871	Coch-202	coagulation factor C homolog (Limulus polyphemus) [Source:MGI Symbol;Acc:MGI:1278313]	70470	1.15699
12	56295746	56297746	Mbip-201	MAP3K12 binding inhibitory protein 1 [Source:MGI Symbol;Acc:MGI:1918320]	30560	3.39483
12	56519310	56521310	Mbip-201	MAP3K12 binding inhibitory protein 1 [Source:MGI Symbol;Acc:MGI:1918320]	173416	3.39483
12	71296162	71298162	Dact1-001	dapper homolog 1, antagonist of beta-catenin (xenopus) [Source:MGI Symbol;Acc:MGI:1891740]	11722	1.34856
12	76964265	76966265	Max-202	Max protein [Source:MGI Symbol;Acc:MGI:96921]	2017	31.4216
12	79851093	79853093	Zfp36l1-201	zinc finger protein 36, C3H type-like 1 [Source:MGI Symbol;Acc:MGI:107946]	254667	3.78028
12	80115853	80117853	Zfp36l1-201	zinc finger protein 36, C3H type-like 1 [Source:MGI Symbol;Acc:MGI:107946]	2840	3.78028
12	86930570	86932570	2310044G17Rik-201	RIKEN cDNA 2310044G17 gene [Source:MGI Symbol;Acc:MGI:1919185]	14773	5.19691
12	87288361	87290361	Ism2-001	isthmin 2 homolog (zebrafish) [Source:MGI Symbol;Acc:MGI:2685110]	genic	5.29765
12	102729514	102731514	RP23-377G8.1-001	No description	genic	3.4553
12	106174667	106176667	Vrk1-201	vaccinia related kinase 1 [Source:MGI Symbol;Acc:MGI:1261847]	97257	27.1492
12	110417136	110419136	Ppp2r5c-201	protein phosphatase 2, regulatory subunit B (B56), gamma isoform [Source:MGI Symbol;Acc:MGI:1349475]	68603	21.7639
12	112875317	112877317	Gpr132-201	G protein-coupled receptor 132 [Source:MGI Symbol;Acc:MGI:1890220]	14401	0.159962
12	117683265	117685265	Rapgef5-201	Rap guanine nucleotide exchange factor (GEF) 5 [Source:MGI Symbol;Acc:MGI:2444365]	genic	3.96525
13	6646347	6648347	Pitrm1-201	pitrilysin metallepetidase 1 [Source:MGI Symbol;Acc:MGI:1916867]	genic	20.4106
13	34108883	34110883	Tubb2b-201	tubulin, beta 2B class IIB [Source:MGI Symbol;Acc:MGI:1920960]	16125	129.618
13	38108305	38110305	Dsp-002	desmoplakin [Source:MGI Symbol;Acc:MGI:109611]	41023	2.20738
13	40850980	40852980	Gcnt2-203	glucosaminyl (N-acetyl) transferase 2, I-branching enzyme [Source:MGI Symbol;Acc:MGI:1100870]	6788	2.42224
13	40868062	40870062	Gcnt2-203	glucosaminyl (N-acetyl) transferase 2, I-branching enzyme [Source:MGI Symbol;Acc:MGI:1100870]	genic	2.42224
13	44721343	44723343	Jarid2-009	jumonji, AT rich interactive domain 2 [Source:MGI Symbol;Acc:MGI:104813]	6131	25.7264
13	47854828	47856828	Id4-201	inhibitor of DNA binding 4 [Source:MGI Symbol;Acc:MGI:99414]	404599	3.70425
13	51845252	51847252	Gadd45g-001	growth arrest and DNA-damage-inducible 45 gamma [Source:MGI Symbol;Acc:MGI:1346325]	genic	0.354298
13	53234056	53236056	Ror2-002	receptor tyrosine kinase-like orphan receptor 2 [Source:MGI Symbol;Acc:MGI:1347521]	genic	1.48356
13	53460521	53462521	Msx2-001	homeobox, msh-like 2 [Source:MGI Symbol;Acc:MGI:97169]	4360	0.145041
13	54215004	54217004	Sfxn1-201	sideroflexin 1 [Source:MGI Symbol;Acc:MGI:2137677]	106658	19.3526
13	55246490	55248490	Nsd1-201	nuclear receptor-binding SET-domain protein 1 [Source:MGI Symbol;Acc:MGI:1276545]	genic	21.5765
13	56142403	56144403	H2afy-001	H2A histone family, member Y [Source:MGI Symbol;Acc:MGI:1349392]	6042	5.88434
13	74398468	74400468	Gm10116-201	predicted pseudogene 10116 [Source:MGI Symbol;Acc:MGI:3779109]	5928	78.3938
13	94705768	94707768	Tbca-201	tubulin cofactor A [Source:MGI Symbol;Acc:MGI:107549]	81175	60.4831
13	97206633	97208633	Gfm2-003	G elongation factor, mitochondrial 2 [Source:MGI Symbol;Acc:MGI:2444783]	8276	66.4485
13	106855753	106857753	Ipo11-201	importin 11 [Source:MGI Symbol;Acc:MGI:2442377]	genic	15.069
13	109631233	109633233	Pde4d-002	phosphodiesterase 4D, cAMP specific [Source:MGI Symbol;Acc:MGI:99555]	genic	4.157
13	110018388	110020388	Pde4d-202	phosphodiesterase 4D, cAMP specific [Source:MGI Symbol;Acc:MGI:99555]	62425	2.21295
13	112769758	112771758	Ppap2a-201	phosphatidic acid phosphatase type 2A [Source:MGI Symbol;Acc:MGI:108412]	29136	20.4693
14	8402494	8404494	Oit1-201	oncoprotein induced transcript 1 [Source:MGI Symbol;Acc:MGI:1201784]	23731	0.705094
14	9318113	9320113	Fhit-001	fragile histidine triad gene [Source:MGI Symbol;Acc:MGI:1277947]	229979	0.221849
14	24252928	24254928	Dlg5-004	discs, large homolog 5 (Drosophila) [Source:MGI Symbol;Acc:MGI:1918478]	7008	5.02535
14	48653891	48655891	Otx2-001	orthodenticle homolog 2 (Drosophila) [Source:MGI Symbol;Acc:MGI:97451]	13753	14.2589
14	48700231	48702231	Otx2-001	orthodenticle homolog 2 (Drosophila) [Source:MGI Symbol;Acc:MGI:97451]	32587	14.2589
14	49446927	49448927	3632451O06Rik-001	RIKEN cDNA 3632451O06 gene [Source:MGI Symbol;Acc:MGI:1914669]	232633	1.00722
14	50869657	50871657	Tep1-201	telomerase associated protein 1 [Source:MGI Symbol;Acc:MGI:109573]	genic	0.990612
14	55085030	55087030	Gm20687-001	predicted gene 20687 [Source:MGI Symbol;Acc:MGI:5313134]	genic	1.05115
14	63499424	63501424	Tdh-001	L-threonine dehydrogenase [Source:MGI Symbol;Acc:MGI:1926231]	genic	0.112337
14	64407171	64409171	Msra-201	methionine sulfoxide reductase A [Source:MGI Symbol;Acc:MGI:106916]	genic	2.9471
14	76387128	76389128	Tsc22d1-006	TSC22 domain family, member 1 [Source:MGI Symbol;Acc:MGI:109127]	25833	20.8425
14	76514784	76516784	Tsc22d1-006	TSC22 domain family, member 1 [Source:MGI Symbol;Acc:MGI:109127]	7019	20.8425
14	77249889	77251889	Enox1-201	ecto-NOX disulfide-thiol exchanger 1 [Source:MGI Symbol;Acc:MGI:2444896]	genic	3.40957
14	78288100	78290100	Akap11-001	A kinase (PRKA) anchor protein 11 [Source:MGI Symbol;Acc:MGI:2684060]	202146	4.80667
14	99038484	99040484	Mzt1-201	mitotic spindle organizing protein 1 [Source:MGI Symbol;Acc:MGI:1924039]	genic	8.31605
14	105860080	105862080	Spry2-201	sprouty homolog 2 (Drosophila) [Source:MGI Symbol;Acc:MGI:1345138]	29869	2.57495
14	121505448	121507448	Slc15a1-201	solute carrier family 15 (oligopeptide transporter), member 1 [Source:MGI Symbol;Acc:MGI:1861376]	194	2.68865
14	122467137	122469137	2610035F20Rik-002	RIKEN cDNA 2610035F20 gene [Source:MGI Symbol;Acc:MGI:1916498]	1147	0.126212
15	10722746	10724746	Rai14-201	retinoic acid induced 14 [Source:MGI Symbol;Acc:MGI:1922896]	8115	9.90238
15	41881774	41883774	Abra-201	actin-binding Rho activating protein [Source:MGI Symbol;Acc:MGI:2444891]	12054	0.0770167
15	43529000	43531000	Ttc35-201	tetratricopeptide repeat domain 35 [Source:MGI Symbol;Acc:MGI:1913986]	1223	12.9232
15	52012264	52014264	Rad21-201	RAD21 homolog (S. pombe) [Source:MGI Symbol;Acc:MGI:108016]	20504	40.6023
15	52967001	52969001	Ext1-001	exostoses (multiple) 1 [Source:MGI Symbol;Acc:MGI:894663]	95037	2.04765
15	59391091	59393091	Nsmce2-201	non-SMC element 2 homolog (MMS21, S. cerevisiae) [Source:MGI Symbol;Acc:MGI:1915751]	genic	5.00978
15	59822943	59824943	Trib1-001	tribbles homolog 1 (Drosophila) [Source:MGI Symbol;Acc:MGI:2443397]	166393	1.98829
15	62091890	62093890	Myc-001	myelocytomatosis oncogene [Source:MGI Symbol;Acc:MGI:97250]	101516	1.87922
15	65748769	65750769	Efr3a-006	EFR3 homolog A (S. cerevisiae) [Source:MGI Symbol;Acc:MGI:1923990]	36265	4.91177
15	67070164	67072164	Ndrg1-001	N-myc downstream regulated gene 1 [Source:MGI Symbol;Acc:MGI:1341799]	100524	2.53814
15	76306366	76308366	Gm10345-001	predicted gene 10345 [Source:MGI Symbol;Acc:MGI:3709877]	genic	0.416798
15	76668765	76670765	Foxh1-201	forkhead box H1 [Source:MGI Symbol;Acc:MGI:1347465]	genic	9.4491
15	77846955	77848955	Myh9-001	myosin, heavy polypeptide 9, non-muscle [Source:MGI Symbol;Acc:MGI:107717]	4780	13.8126
15	80011870	80013870	Pdgfb-201	platelet derived growth factor, B polypeptide [Source:MGI Symbol;Acc:MGI:97528]	genic	0.287754
15	88836533	88838533	Creld2-201	cysteine-rich with EGF-like domains 2 [Source:MGI Symbol;Acc:MGI:1923987]	9852	19.0273
15	99703830	99705830	Gm17349-201	predicted gene, 17349 [Source:MGI Symbol;Acc:MGI:4936983]	genic	11.1176
15	100473312	100475312	Letmd1-201	LETM1 domain containing 1 [Source:MGI Symbol;Acc:MGI:1915864]	genic	2.1179
15	103519065	103521065	Pde1b-201	phosphodiesterase 1B, Ca2+-calmodulin dependent [Source:MGI Symbol;Acc:MGI:97523]	genic	0.861354
16	9082764	9084764	Gm10247-201	predicted gene 10247 [Source:MGI Symbol;Acc:MGI:3641838]	160375	0.0764096
16	9132005	9134005	Gm10247-201	predicted gene 10247 [Source:MGI Symbol;Acc:MGI:3641838]	209616	0.0764096
16	29656946	29658946	Opa1-001	optic atrophy 1 homolog (human) [Source:MGI Symbol;Acc:MGI:1921393]	77612	6.44914
16	31947427	31949427	Ncbp2-001	nuclear cap binding protein subunit 2 [Source:MGI Symbol;Acc:MGI:1915342]	genic	13.6403
16	32291031	32293031	Rnf168-002	ring finger protein 168 [Source:MGI Symbol;Acc:MGI:1917488]	genic	5.15883
16	32876622	32878622	1700021K19Rik-201	RIKEN cDNA 1700021K19 gene [Source:MGI Symbol;Acc:MGI:1915160]	genic	1.02304
16	38470948	38472948	Cd80-201	CD80 antigen [Source:MGI Symbol;Acc:MGI:101775]	genic	0.398893
16	42305102	42307102	Gap43-001	growth associated protein 43 [Source:MGI Symbol;Acc:MGI:95639]	genic	0.439945
16	59544573	59546573	Mina-001	myc induced nuclear antigen [Source:MGI Symbol;Acc:MGI:1914264]	genic	0.25825
16	59564840	59566840	Gm9581-001	predicted gene 9581 [Source:MGI Symbol;Acc:MGI:3779989]	genic	0.310298
16	64884334	64886334	Cggbp1-001	CGG triplet repeat binding protein 1 [Source:MGI Symbol;Acc:MGI:2146370]	24827	16.4228
16	73095916	73097916	Robo1-001	roundabout homolog 1 (Drosophila) [Source:MGI Symbol;Acc:MGI:1274781]	49821	1.45451
16	76320857	76322857	Nrip1-001	nuclear receptor interacting protein 1 [Source:MGI Symbol;Acc:MGI:1315213]	genic	0.529305
16	88719217	88721217	Bach1-001	BTB and CNC homology 1 [Source:MGI Symbol;Acc:MGI:894680]	985871	4.4432
16	96844923	96846923	Dscam-001	Down syndrome cell adhesion molecule [Source:MGI Symbol;Acc:MGI:1196281]	genic	0.0995424
17	9201742	9203742	1700010I14Rik-001	RIKEN cDNA 1700010I14 gene [Source:MGI Symbol;Acc:MGI:1914181]	193423	0.107714
17	10365258	10367258	Qk-203	quaking [Source:MGI Symbol;Acc:MGI:97837]	45897	8.46687
17	10431869	10433869	Qk-203	quaking [Source:MGI Symbol;Acc:MGI:97837]	112508	8.46687
17	13682822	13684822	Tcte2-010	t-complex-associated testis expressed 2 [Source:MGI Symbol;Acc:MGI:98641]	genic	0.20537
17	14692564	14694564	Thbs2-201	thrombospondin 2 [Source:MGI Symbol;Acc:MGI:98738]	genic	0.080203
17	15247082	15249082	Dll1-001	delta-like 1 (Drosophila) [Source:MGI Symbol;Acc:MGI:104659]	118272	0.154793
17	28593013	28595013	Srpk1-001	serine/arginine-rich protein specific kinase 1 [Source:MGI Symbol;Acc:MGI:106908]	genic	9.41867
17	33599145	33601145	Myo1f-001	myosin IF [Source:MGI Symbol;Acc:MGI:107711]	genic	0.362456
17	36996574	36998574	Zfp57-001	zinc finger protein 57 [Source:MGI Symbol;Acc:MGI:99204]	2589	28.9279
17	37078194	37080194	Gabbr1-001	gamma-aminobutyric acid (GABA) B receptor, 1 [Source:MGI Symbol;Acc:MGI:1860139]	3127	1.87348
17	37989678	37991678	H2-M3-001	histocompatibility 2, M region locus 3 [Source:MGI Symbol;Acc:MGI:95915]	715194	0.336192
17	44471742	44473742	Runx2-201	runt related transcription factor 2 [Source:MGI Symbol;Acc:MGI:99829]	303410	1.09286
17	45474010	45476010	Spats1-201	spermatogenesis associated, serine-rich 1 [Source:MGI Symbol;Acc:MGI:1918270]	genic	0.723849
17	45494570	45496570	Aars2-201	alanyl-tRNA synthetase 2, mitochondrial (putative) [Source:MGI Symbol;Acc:MGI:2681839]	10271	5.17552
17	45600857	45602857	Gm7325-202	predicted gene 7325 [Source:MGI Symbol;Acc:MGI:3649059]	genic	14.0952
17	45606311	45608311	Gm7325-202	predicted gene 7325 [Source:MGI Symbol;Acc:MGI:3649059]	4209	14.0952
17	47510540	47512540	Ccnd3-202	cyclin D3 [Source:MGI Symbol;Acc:MGI:88315]	5489	39.9428
17	47570816	47572816	Ccnd3-202	cyclin D3 [Source:MGI Symbol;Acc:MGI:88315]	genic	10.7218
17	47712243	47714243	Prickle4-001	prickle homolog 4 (Drosophila) [Source:MGI Symbol;Acc:MGI:2685785]	7957	1.06561
17	63812991	63814991	Fer-201	fer (fms/fps related) protein kinase [Source:MGI Symbol;Acc:MGI:105917]	81027	2.07091
17	70864197	70866197	C230073G13Rik-001	RIKEN cDNA C230073G13 gene [Source:MGI Symbol;Acc:MGI:2444005]	10430	0.536075
17	79363966	79365966	Cdc42ep3-201	CDC42 effector protein (Rho GTPase binding) 3 [Source:MGI Symbol;Acc:MGI:2384718]	8875	3.18648
17	84350473	84352473	Thada-201	thyroid adenoma associated [Source:MGI Symbol;Acc:MGI:3039623]	genic	6.74408
17	85161849	85163849	1700106N22Rik-201	RIKEN cDNA 1700106N22 gene [Source:MGI Symbol;Acc:MGI:1920832]	genic	1.79751
17	88510189	88512189	Klraq1-201	KLRAQ motif containing 1 [Source:MGI Symbol;Acc:MGI:1921075]	17935	3.72232
18	5010992	5012992	Svil-001	supervillin [Source:MGI Symbol;Acc:MGI:2147319]	genic	2.45516
18	5162348	5164348	Svil-001	supervillin [Source:MGI Symbol;Acc:MGI:2147319]	43049	2.45516
18	6274666	6276666	Kif5b-001	kinesin family member 5B [Source:MGI Symbol;Acc:MGI:1098268]	32492	6.92624
18	13711786	13713786	Zfp521-201	zinc finger protein 521 [Source:MGI Symbol;Acc:MGI:95459]	genic	0.228856
18	24867843	24869843	Fhod3-201	formin homology 2 domain containing 3 [Source:MGI Symbol;Acc:MGI:1925847]	genic	1.90089
18	33834988	33836988	Epb4.1l4a-201	erythrocyte protein band 4.1-like 4a [Source:MGI Symbol;Acc:MGI:103007]	genic	6.96039
18	35042485	35044485	Ctnna1-201	catenin (cadherin associated protein), alpha 1 [Source:MGI Symbol;Acc:MGI:88274]	74403	58.6478
18	35756741	35758741	Ube2d2-202	ubiquitin-conjugating enzyme E2D 2 [Source:MGI Symbol;Acc:MGI:1930715]	12818	24.9798
18	37770648	37772648	Pcdhga11-207	protocadherin gamma subfamily A, 11 [Source:MGI Symbol;Acc:MGI:1935228]	genic	0.565561
18	38635092	38637092	Arhgap26-010	Rho GTPase activating protein 26 [Source:MGI Symbol;Acc:MGI:1918552]	genic	0.391505
18	38903080	38905080	Arhgap26-010	Rho GTPase activating protein 26 [Source:MGI Symbol;Acc:MGI:1918552]	genic	0.391505
18	40307184	40309184	Yipf5-201	Yip1 domain family, member 5 [Source:MGI Symbol;Acc:MGI:1914430]	87785	7.23965
18	54718404	54720404	Csnk1g3-201	casein kinase 1, gamma 3 [Source:MGI Symbol;Acc:MGI:1917675]	762720	3.0768
18	55189383	55191383	Csnk1g3-201	casein kinase 1, gamma 3 [Source:MGI Symbol;Acc:MGI:1917675]	1233699	3.0768
18	61627289	61629289	Il17b-201	interleukin 17B [Source:MGI Symbol;Acc:MGI:1928397]	60646	0.882465
18	69924566	69926566	Ccdc68-003	coiled-coil domain containing 68 [Source:MGI Symbol;Acc:MGI:3612676]	genic	0.444929
18	75209515	75211515	Dym-201	dymeclin [Source:MGI Symbol;Acc:MGI:1918480]	genic	7.12567
18	75344046	75346046	Gm20544-001	predicted gene 20544 [Source:MGI Symbol;Acc:MGI:5142009]	19286	0.233548
18	75360115	75362115	Gm20544-001	predicted gene 20544 [Source:MGI Symbol;Acc:MGI:5142009]	3217	0.233548
18	75464049	75466049	Ctif-201	CBP80/20-dependent translation initiation factor [Source:MGI Symbol;Acc:MGI:2685518]	genic	0.48913
18	75900656	75902656	Zbtb7c-201	zinc finger and BTB domain containing 7C [Source:MGI Symbol;Acc:MGI:2443302]	genic	0.184731
18	80183858	80185858	Rbfa-201	ribosome binding factor A [Source:MGI Symbol;Acc:MGI:1915981]	6407	8.54306
18	81196468	81198468	Sall3-201	sal-like 3 (Drosophila) [Source:MGI Symbol;Acc:MGI:109295]	209890	1.77611
19	4896128	4898128	Bbs1-201	Bardet-Biedl syndrome 1 (human) [Source:MGI Symbol;Acc:MGI:1277215]	genic	0.329776
19	6921075	6923075	Trmt112-001	tRNA methyltransferase 11-2 homolog (S. cerevisiae) [Source:MGI Symbol;Acc:MGI:1914924]	genic	3.93174
19	7260740	7262740	Rcor2-002	REST corepressor 2 [Source:MGI Symbol;Acc:MGI:1859854]	4585	26.6131
19	7582568	7584568	Pla2g16-001	phospholipase A2, group XVI [Source:MGI Symbol;Acc:MGI:2179715]	genic	1.60453
19	10266079	10268079	Dagla-001	diacylglycerol lipase, alpha [Source:MGI Symbol;Acc:MGI:2677061]	genic	0.0959275
19	21817217	21819217	Tmem2-202	transmembrane protein 2 [Source:MGI Symbol;Acc:MGI:1890373]	genic	6.53125
19	21893993	21895993	Tmem2-202	transmembrane protein 2 [Source:MGI Symbol;Acc:MGI:1890373]	35666	6.53125
19	23075040	23077040	2410080I02Rik-001	RIKEN cDNA 2410080I02 gene [Source:MGI Symbol;Acc:MGI:1915498]	57860	1.47504
19	23151381	23153381	Klf9-201	Kruppel-like factor 9 [Source:MGI Symbol;Acc:MGI:1333856]	genic	9.59136
19	25487795	25489795	Dmrt1-001	doublesex and mab-3 related transcription factor 1 [Source:MGI Symbol;Acc:MGI:1354733]	15823	1.7231
19	27903835	27905835	Rfx3-201	regulatory factor X, 3 (influences HLA class II expression) [Source:MGI Symbol;Acc:MGI:106582]	genic	0.326683
19	28181922	28183922	Glis3-001	GLIS family zinc finger 3 [Source:MGI Symbol;Acc:MGI:2444289]	74929	0.808627
19	37876930	37878930	Myof-201	myoferlin [Source:MGI Symbol;Acc:MGI:1919192]	20106	4.14111
19	42321626	42323626	Crtac1-201	cartilage acidic protein 1 [Source:MGI Symbol;Acc:MGI:1920082]	genic	3.06707
19	42384181	42386181	Crtac1-201	cartilage acidic protein 1 [Source:MGI Symbol;Acc:MGI:1920082]	genic	3.06707
19	44048435	44050435	Erlin1-001	ER lipid raft associated 1 [Source:MGI Symbol;Acc:MGI:2387613]	genic	2.23961
19	45142760	45144760	Sfxn3-201	sideroflexin 3 [Source:MGI Symbol;Acc:MGI:2137679]	86377	2.22474
19	46523911	46525911	Arl3-201	ADP-ribosylation factor-like 3 [Source:MGI Symbol;Acc:MGI:1929699]	5198	7.08852
19	47449798	47451798	Sh3pxd2a-201	SH3 and PX domains 2A [Source:MGI Symbol;Acc:MGI:1298393]	genic	1.39088
19	53022222	53024222	Xpnpep1-201	X-prolyl aminopeptidase (aminopeptidase P) 1, soluble [Source:MGI Symbol;Acc:MGI:2180003]	genic	41.1607
19	55490918	55492918	Vti1a-201	vesicle transport through interaction with t-SNAREs homolog 1A (yeast) [Source:MGI Symbol;Acc:MGI:1855699]	genic	1.45966
X	12839284	12841284	Med14-003	mediator complex subunit 14 [Source:MGI Symbol;Acc:MGI:1349442]	77211	3.85794
X	13460872	13462872	Cask-001	calcium/calmodulin-dependent serine protein kinase (MAGUK family) [Source:MGI Symbol;Acc:MGI:1309489]	54208	3.16536
X	48063338	48065338	Apln-001	apelin [Source:MGI Symbol;Acc:MGI:1353624]	28485	1.88806
X	51683787	51685787	Usp26-001	ubiquitin specific peptidase 26 [Source:MGI Symbol;Acc:MGI:1933247]	68172	3.42091
X	58013317	58015317	Zic3-004	zinc finger protein of the cerebellum 3 [Source:MGI Symbol;Acc:MGI:106676]	7383	10.6005
X	60771672	60773672	Atp11c-001	ATPase, class VI, type 11C [Source:MGI Symbol;Acc:MGI:1859661]	genic	0.0785704
