# Supplementary material for: Enhancers and super-enhancers have an equivalent regulatory role in embryonic stem cells through regulation of single or multiple genes
Source: HighWire-hosted journal article supplement (doi:10.1101/gr.210930.116), 2016-11-28
Supplement: Supplemental_Table_S8.xlsx [file Supplemental_Table_S8.xlsx]

## Sheet: tiled_enh_model_P0.8andup_mm10
Chromosome	start	end	probability
chr10	85539656	85540656	1
chr3	34758079	34759079	1
chr3	34760179	34761179	1
chr3	34760879	34761879	1
chr4	55474729	55475729	1
chr4	55476829	55477829	1
chr5	64864162	64865162	1
chr6	122340683	122341683	1
chr6	122341383	122342383	1
chr7	3206000	3207000	1
chr7	3206700	3207700	1
chr8	43320547	43321547	1
chr8	89003202	89004202	1
chr9	58278794	58279794	1
chr9	110947397	110948397	1
chr10	62895353	62896353	0.9999
chr11	12466898	12467898	0.9999
chr11	44746399	44747399	0.9999
chr12	86501351	86502351	0.9999
chr17	70828061	70829061	0.9999
chr4	55475429	55476429	0.9999
chr3	34757379	34758379	0.9998
chr3	135546237	135547237	0.9998
chr4	55463529	55464529	0.9998
chr3	88571779	88572779	0.9997
chr4	141564786	141565786	0.9997
chr6	65024007	65025007	0.9997
chr6	149131179	149132179	0.9997
chr7	140959302	140960302	0.9997
chr6	65024707	65025707	0.9996
chr7	107236487	107237487	0.9996
chr1	36985756	36986756	0.9995
chr10	62896753	62897753	0.9995
chr17	36997356	36998356	0.9995
chr3	34756679	34757679	0.9995
chr3	95652979	95653979	0.9995
chr8	88991302	88992302	0.9995
chr9	58279494	58280494	0.9995
chr5	64864862	64865862	0.9994
chr6	100377507	100378507	0.9994
chr6	122342083	122343083	0.9991
chr11	20230598	20231598	0.9989
chr14	105858684	105859684	0.9989
chr3	34646079	34647079	0.9989
chr10	62894653	62895653	0.9987
chr10	62897453	62898453	0.9987
chr12	12787095	12788095	0.9987
chr9	110948097	110949097	0.9987
chr1	13084520	13085520	0.9986
chr10	56373995	56374995	0.9986
chr2	154426265	154427265	0.9986
chr3	34759479	34760479	0.9986
chr4	141569686	141570686	0.9985
chr11	62510999	62511999	0.9984
chr19	5845701	5846701	0.9984
chr4	55464229	55465229	0.9984
chr10	21745695	21746695	0.9982
chr17	45606652	45607652	0.9982
chr8	43319847	43320847	0.9982
chr9	110946697	110947697	0.9982
chr11	8575598	8576598	0.9981
chr6	145275581	145276581	0.9977
chr11	8569298	8570298	0.9975
chr12	86498551	86499551	0.9975
chr14	99339582	99340582	0.9975
chr2	146631065	146632065	0.9973
chr3	135546937	135547937	0.9972
chr12	12943195	12944195	0.9971
chr2	71866444	71867444	0.997
chr7	80129715	80130715	0.997
chr12	39997314	39998314	0.9969
chr3	34667779	34668779	0.9966
chr2	154427665	154428665	0.9965
chr1	131890224	131891224	0.9964
chr4	142166086	142167086	0.9964
chr1	131889524	131890524	0.9963
chr3	135545537	135546537	0.9963
chr15	97593470	97594470	0.996
chr6	82174707	82175707	0.996
chr7	133114918	133115918	0.996
chr10	21988595	21989595	0.9959
chr2	20654174	20655174	0.9959
chr3	34755979	34756979	0.9959
chr8	89002502	89003502	0.9959
chr6	143141981	143142981	0.9955
chr7	3211600	3212600	0.9955
chr1	36985056	36986056	0.9954
chr11	97661287	97662287	0.9954
chr13	37435832	37436832	0.9952
chr5	110469182	110470182	0.9951
chr1	182162870	182163870	0.995
chr10	44391395	44392395	0.9948
chr11	107352787	107353787	0.9947
chr6	125433283	125434283	0.9947
chr12	12803195	12804195	0.9946
chr2	154423465	154424465	0.9946
chr5	110227682	110228682	0.9946
chr7	49346631	49347631	0.9944
chr7	49347331	49348331	0.9944
chr2	20669574	20670574	0.9943
chr14	78288594	78289594	0.9942
chr18	69781547	69782547	0.9941
chr6	39446002	39447002	0.9941
chr10	80050956	80051956	0.9939
chr1	12744320	12745320	0.9936
chr2	163031365	163032365	0.9936
chrX	162831669	162832669	0.9936
chr1	182029870	182030870	0.9934
chr2	20654874	20655874	0.9932
chr11	8635098	8636098	0.9931
chr1	180924570	180925570	0.993
chr3	53650179	53651179	0.993
chr17	70828761	70829761	0.9928
chr1	180888170	180889170	0.9927
chr1	36987156	36988156	0.9924
chr11	80131399	80132399	0.9922
chr11	107352087	107353087	0.9922
chr19	5846401	5847401	0.9922
chr19	44265611	44266611	0.9921
chr8	72334102	72335102	0.9921
chr4	141565486	141566486	0.992
chr10	21987895	21988895	0.9919
chr3	133523937	133524937	0.9916
chr10	62898153	62899153	0.9915
chr11	33527101	33528101	0.9914
chr17	84351061	84352061	0.9914
chr3	34734979	34735979	0.9912
chr3	95652279	95653279	0.9911
chr7	30463682	30464682	0.9911
chr18	33835147	33836147	0.9908
chr2	165968801	165969801	0.9908
chr6	67111407	67112407	0.9907
chr15	25769346	25770346	0.9906
chr2	144715165	144716165	0.9906
chr11	8568598	8569598	0.9904
chr4	141291086	141292086	0.9904
chr1	59448757	59449757	0.9903
chr17	31807556	31808556	0.9902
chr1	119398024	119399024	0.9901
chr8	84649902	84650902	0.9899
chr11	97661987	97662987	0.9897
chr19	46836011	46837011	0.9896
chr5	108076582	108077582	0.9896
chr2	65420844	65421844	0.9895
chr7	3201100	3202100	0.9894
chr7	3203900	3204900	0.9894
chr2	71865744	71866744	0.9893
chr13	95533946	95534946	0.9892
chr16	84769056	84770056	0.9891
chr7	13014252	13015252	0.9891
chr11	9115998	9116998	0.989
chr5	72902262	72903262	0.9887
chr11	69707699	69708699	0.9886
chr15	50900255	50901255	0.9886
chr1	89869926	89870926	0.9885
chr18	75584547	75585547	0.9885
chr6	148991879	148992879	0.9885
chr18	75360547	75361547	0.9884
chr6	65021907	65022907	0.9884
chr8	36547247	36548247	0.9882
chrX	103986862	103987862	0.9881
chr10	62896053	62897053	0.9879
chr14	122415779	122416779	0.9879
chr11	30749501	30750501	0.9876
chr2	71867144	71868144	0.9876
chrX	8008075	8009075	0.9872
chr18	33835847	33836847	0.987
chrX	103438062	103439062	0.9868
chr7	4820999	4821999	0.9867
chr6	67145707	67146707	0.9866
chr10	28013495	28014495	0.9864
chr10	82808956	82809956	0.9864
chr17	36996656	36997656	0.9862
chr4	119071196	119072196	0.9861
chr18	30120947	30121947	0.986
chr2	21392674	21393674	0.986
chr7	80130415	80131415	0.986
chr7	3213000	3214000	0.9852
chr10	44392095	44393095	0.985
chr2	40911081	40912081	0.985
chr11	117081387	117082387	0.9849
chr4	133122086	133123086	0.9849
chr1	72228427	72229427	0.9848
chr2	20668874	20669874	0.9847
chr6	53201007	53202007	0.9846
chr9	78364594	78365594	0.9843
chr5	110226982	110227982	0.9842
chr5	118436592	118437592	0.9841
chr11	34738499	34739499	0.984
chr12	110837391	110838391	0.984
chr3	149219337	149220337	0.9838
chr1	164377270	164378270	0.9835
chrX	103437362	103438362	0.9835
chr15	103519670	103520670	0.9833
chr17	70900861	70901861	0.9833
chr10	21101695	21102695	0.9831
chr12	12177395	12178395	0.983
chr3	103207378	103208378	0.9829
chr6	65021207	65022207	0.9828
chr17	35503556	35504556	0.9826
chr8	72311002	72312002	0.9825
chr14	105859384	105860384	0.9824
chr15	62092546	62093546	0.9822
chr1	166125170	166126170	0.9821
chr4	86183197	86184197	0.982
chr17	37079956	37080956	0.9819
chr6	128261283	128262283	0.9816
chr19	23089211	23090211	0.9815
chr6	37857001	37858001	0.9814
chr11	77672999	77673999	0.9813
chr18	36415347	36416347	0.9813
chr8	48751847	48752847	0.9813
chr1	134534824	134535824	0.9811
chr1	182030570	182031570	0.981
chr16	42781788	42782788	0.981
chr3	27154679	27155679	0.981
chr6	100378207	100379207	0.981
chr4	57690929	57691929	0.9807
chr11	69703499	69704499	0.9806
chr11	117975287	117976287	0.9806
chr14	122467579	122468579	0.9806
chrX	99556562	99557562	0.9806
chr10	21845795	21846795	0.9804
chr4	10931954	10932954	0.9803
chr15	75084971	75085971	0.9802
chr10	21845095	21846095	0.98
chr4	99635310	99636310	0.9798
chr4	105223796	105224796	0.9798
chr10	99460667	99461667	0.9795
chr2	92143344	92144344	0.9795
chr2	165980701	165981701	0.9795
chr18	65586447	65587447	0.9792
chr6	149130479	149131479	0.9792
chr1	136674724	136675724	0.9791
chr12	86504151	86505151	0.9791
chr18	17418492	17419492	0.9791
chr3	88571079	88572079	0.9791
chr4	133660386	133661386	0.979
chr19	23094811	23095811	0.9789
chr17	45607352	45608352	0.9788
chr12	41729914	41730914	0.9785
chr4	99641610	99642610	0.9785
chr1	186509722	186510722	0.9782
chr10	84554756	84555756	0.9782
chr10	88684756	88685756	0.9781
chr18	75578947	75579947	0.978
chr1	36987856	36988856	0.9779
chr1	136727224	136728224	0.9779
chr12	86502051	86503051	0.9779
chr14	77519294	77520294	0.9777
chr4	84662097	84663097	0.9771
chr4	33823126	33824126	0.9769
chr4	53952229	53953229	0.9768
chr12	41729214	41730214	0.9766
chr12	110836691	110837691	0.9766
chr3	34645379	34646379	0.9764
chr17	46812052	46813052	0.9759
chr11	95704087	95705087	0.9757
chr3	95650879	95651879	0.9757
chr3	122433783	122434783	0.9756
chr4	141282686	141283686	0.9756
chr17	53561176	53562176	0.9744
chrX	58039824	58040824	0.9744
chr2	70278144	70279144	0.9741
chr2	115723265	115724265	0.9741
chr11	7423398	7424398	0.974
chr19	21788611	21789611	0.974
chr4	99636010	99637010	0.9738
chr2	44525181	44526181	0.9737
chr7	63947815	63948815	0.9737
chr1	54485057	54486057	0.9732
chr13	34243832	34244832	0.9731
chr15	7116501	7117501	0.9731
chr17	70827361	70828361	0.973
chr6	5019301	5020301	0.973
chr16	13748608	13749608	0.9729
chr2	163051665	163052665	0.9729
chr18	38903847	38904847	0.9728
chr3	72858179	72859179	0.9727
chr10	84910356	84911356	0.9723
chr8	90827402	90828402	0.9722
chr1	89870626	89871626	0.9719
chr17	36995256	36996256	0.9719
chr19	32255011	32256011	0.9719
chr5	119579692	119580692	0.9718
chr18	30121647	30122647	0.9711
chr7	140962102	140963102	0.971
chr4	86045997	86046997	0.9708
chr4	106858996	106859996	0.9706
chr11	111043187	111044187	0.9705
chr14	99324882	99325882	0.9704
chr10	34233695	34234695	0.9702
chr3	34668479	34669479	0.9701
chr6	144361381	144362381	0.9701
chr10	116562045	116563045	0.9698
chr1	180923870	180924870	0.9696
chr1	118647624	118648624	0.9695
chr12	56296214	56297214	0.9694
chr17	66479661	66480661	0.9693
chr9	44595018	44596018	0.969
chr10	85071356	85072356	0.9687
chr12	72649614	72650614	0.9684
chrX	52746524	52747524	0.9682
chr12	73085714	73086714	0.9679
chr12	86478951	86479951	0.9679
chr1	35232256	35233256	0.9675
chr9	7633501	7634501	0.9675
chr10	108286645	108287645	0.967
chr11	102331687	102332687	0.967
chr13	97282546	97283546	0.967
chr12	86500651	86501651	0.9668
chr9	78374394	78375394	0.9668
chr6	65022607	65023607	0.9667
chr19	23075911	23076911	0.9666
chr5	92112375	92113375	0.9662
chr10	19208195	19209195	0.9661
chr1	180888870	180889870	0.9654
chr2	131882765	131883765	0.9653
chr11	22829701	22830701	0.9651
chr1	54484357	54485357	0.9649
chr17	70829461	70830461	0.9648
chr1	166124470	166125470	0.9647
chr10	52273395	52274395	0.9647
chr3	54989979	54990979	0.9643
chr11	89067387	89068387	0.9642
chr6	145276281	145277281	0.9638
chr10	62892553	62893553	0.9637
chr6	39445302	39446302	0.9637
chr4	123624258	123625258	0.9635
chr15	10723546	10724546	0.9634
chr7	129420887	129421887	0.9634
chr14	99324182	99325182	0.9631
chr1	11277820	11278820	0.9629
chr12	86478251	86479251	0.9629
chr8	27236029	27237029	0.9629
chr11	63270499	63271499	0.9625
chr7	127223587	127224587	0.9624
chr3	34734279	34735279	0.962
chr7	97803891	97804891	0.9618
chr14	99340282	99341282	0.9616
chr2	172544601	172545601	0.9616
chr5	25554183	25555183	0.9616
chr13	44678032	44679032	0.9614
chr2	92144044	92145044	0.9611
chr14	48700926	48701926	0.9609
chr4	57690229	57691229	0.9606
chr18	36252947	36253947	0.9605
chr18	24868600	24869600	0.9604
chr3	133524637	133525637	0.9604
chr1	140428824	140429824	0.9603
chr11	33536901	33537901	0.9603
chr11	77679999	77680999	0.9602
chr4	124832457	124833457	0.9602
chr1	119076024	119077024	0.96
chrX	103311362	103312362	0.96
chr5	72901562	72902562	0.9598
chr3	129543683	129544683	0.9597
chr14	105860784	105861784	0.9596
chr13	52562132	52563132	0.9593
chr12	110471991	110472991	0.9592
chr1	132200324	132201324	0.9591
chr2	119857465	119858465	0.9591
chr4	127344757	127345757	0.9591
chr3	41495379	41496379	0.959
chr7	38028582	38029582	0.959
chr15	25770046	25771046	0.9583
chr2	93926944	93927944	0.958
chr1	119398724	119399724	0.9579
chr10	61415553	61416553	0.9579
chr13	63530093	63531093	0.9579
chr3	84181379	84182379	0.9579
chr1	154100971	154101971	0.9578
chr2	172520801	172521801	0.9576
chr3	8245301	8246301	0.9576
chr3	34744779	34745779	0.9575
chr13	48244532	48245532	0.9569
chr17	37989956	37990956	0.9568
chr12	86465651	86466651	0.9566
chr12	12787795	12788795	0.9562
chr8	14014701	14015701	0.9562
chr6	122764883	122765883	0.9558
chr9	42857618	42858618	0.9558
chr1	13085220	13086220	0.9554
chr7	3347999	3348999	0.9554
chr14	48700226	48701226	0.9552
chr1	11501120	11502120	0.9548
chr8	36547947	36548947	0.9548
chr19	28182411	28183411	0.9541
chr17	80800661	80801661	0.9538
chr1	164376570	164377570	0.9536
chr17	10432435	10433435	0.9536
chr1	62767227	62768227	0.9535
chr2	71651544	71652544	0.9535
chr10	70359453	70360453	0.9531
chr2	160656265	160657265	0.9531
chr10	28014195	28015195	0.9529
chr10	93241756	93242756	0.9528
chr9	120679883	120680883	0.9528
chr4	110311396	110312396	0.9527
chr11	63271199	63272199	0.9526
chr10	59974253	59975253	0.9524
chr17	10431735	10432735	0.9519
chr2	60196744	60197744	0.9519
chr15	88708371	88709371	0.9517
chr17	45601752	45602752	0.9516
chr19	23087111	23088111	0.9516
chr4	53951529	53952529	0.9514
chr11	88967987	88968987	0.9513
chr6	83889707	83890707	0.9513
chr6	55791707	55792707	0.9511
chr12	12802495	12803495	0.951
chr2	154422765	154423765	0.9509
chr8	111612501	111613501	0.9509
chr2	166156401	166157401	0.9508
chr1	63137527	63138527	0.9506
chr4	141281986	141282986	0.9506
chr2	8497974	8498974	0.9504
chrX	103987562	103988562	0.9501
chr7	25264082	25265082	0.9499
chr1	153375771	153376771	0.9498
chr9	32094916	32095916	0.9498
chr14	77250494	77251494	0.9496
chr2	112676444	112677444	0.9495
chr4	53789129	53790129	0.9492
chr18	38383747	38384747	0.9491
chr7	38029282	38030282	0.9491
chr4	137596486	137597486	0.949
chr2	40910381	40911381	0.9489
chr8	126556801	126557801	0.9488
chr10	52278295	52279295	0.9486
chr14	48754126	48755126	0.9486
chr4	119026396	119027396	0.9486
chr2	171230701	171231701	0.9483
chr4	123633358	123634358	0.9482
chr7	144857596	144858596	0.948
chr3	133532337	133533337	0.9479
chr15	62010646	62011646	0.9477
chr10	70358753	70359753	0.9475
chr5	119584592	119585592	0.9474
chr10	19207495	19208495	0.9473
chr19	20923411	20924411	0.9473
chr11	9115298	9116298	0.9472
chr17	11352935	11353935	0.9472
chr1	34073756	34074756	0.9469
chr2	81848444	81849444	0.9469
chr13	112462093	112463093	0.9467
chr3	116722483	116723483	0.9467
chr8	23561729	23562729	0.9466
chr2	20495974	20496974	0.9462
chr1	34073056	34074056	0.9461
chr6	125504683	125505683	0.9461
chr7	3200400	3201400	0.9459
chr1	52953457	52954457	0.9456
chr3	103145778	103146778	0.9456
chr14	76495194	76496194	0.9453
chr4	55477529	55478529	0.9453
chr12	12176695	12177695	0.945
chr3	65656579	65657579	0.945
chr14	63499764	63500764	0.9449
chr11	33533401	33534401	0.9448
chr13	94705846	94706846	0.9448
chr5	134969931	134970931	0.9447
chr2	119789565	119790565	0.9446
chr4	123632658	123633658	0.9446
chr11	102328887	102329887	0.9445
chr5	18687883	18688883	0.9445
chr2	58626290	58627290	0.9444
chr2	70278844	70279844	0.9442
chr18	38635747	38636747	0.9441
chr11	77673699	77674699	0.944
chr4	142070186	142071186	0.944
chr5	103723982	103724982	0.944
chr10	27993895	27994895	0.9439
chr6	52078202	52079202	0.9439
chr14	77518594	77519594	0.9437
chr9	88332463	88333463	0.9436
chr2	21391974	21392974	0.9431
chr15	34047546	34048546	0.943
chr8	78067802	78068802	0.943
chr1	75804326	75805326	0.9428
chr3	34647479	34648479	0.9422
chr8	116673501	116674501	0.9421
chr11	23801301	23802301	0.9419
chr19	45649511	45650511	0.9419
chr7	24516482	24517482	0.9418
chr10	25313595	25314595	0.9415
chr2	115722565	115723565	0.9415
chr17	86751361	86752361	0.9414
chr9	77759094	77760094	0.9413
chr15	7115801	7116801	0.9412
chr6	52105502	52106502	0.9411
chr13	44018632	44019632	0.941
chr6	92843407	92844407	0.941
chr12	40994814	40995814	0.9409
chr5	104433782	104434782	0.9408
chr17	63533352	63534352	0.9406
chr3	103208078	103209078	0.94
chr1	153376471	153377471	0.9399
chr9	77616994	77617994	0.9399
chr6	39429902	39430902	0.9398
chrX	101481562	101482562	0.9398
chr2	69893144	69894144	0.9397
chr1	36060356	36061356	0.9396
chr6	143141281	143142281	0.9396
chr19	41455111	41456111	0.9395
chr7	114740487	114741487	0.9395
chr11	95311387	95312387	0.9392
chr3	157321137	157322137	0.939
chr4	142070886	142071886	0.939
chrX	144337558	144338558	0.939
chr14	55085764	55086764	0.9389
chr18	5012003	5013003	0.9388
chr2	17988574	17989574	0.9386
chr2	135072665	135073665	0.9386
chr4	141284086	141285086	0.9386
chr5	103735182	103736182	0.9386
chr6	122365883	122366883	0.9383
chr10	21701595	21702595	0.9381
chr4	133815786	133816786	0.9381
chr4	155189392	155190392	0.9378
chr10	108285945	108286945	0.9377
chr17	79745761	79746761	0.9377
chr11	8574898	8575898	0.9376
chr15	75085671	75086671	0.9376
chr16	8778608	8779608	0.9376
chr1	136727924	136728924	0.9375
chr12	12784295	12785295	0.9375
chr17	80785261	80786261	0.9372
chr16	41633788	41634788	0.9368
chr6	122702583	122703583	0.9368
chr10	41467495	41468495	0.9367
chr11	88629887	88630887	0.9367
chr15	39728255	39729255	0.9367
chr10	116561345	116562345	0.9366
chr16	42781088	42782088	0.9362
chr2	174261000	174262000	0.9361
chr1	136690124	136691124	0.936
chr2	146299965	146300965	0.9358
chr19	29007711	29008711	0.9356
chr10	95455267	95456267	0.9355
chr11	79002299	79003299	0.9354
chr15	7167601	7168601	0.9353
chr18	38628747	38629747	0.935
chr12	12783595	12784595	0.9349
chr2	171285301	171286301	0.9349
chr16	59544975	59545975	0.9347
chr10	17579295	17580295	0.9346
chr3	79039179	79040179	0.9346
chr11	88968687	88969687	0.9345
chr3	65657279	65658279	0.9345
chr9	18721757	18722757	0.9345
chr7	112688087	112689087	0.9344
chr3	28841679	28842679	0.9342
chr4	6968554	6969554	0.9342
chr13	34109432	34110432	0.9341
chr2	172516601	172517601	0.934
chr10	34230195	34231195	0.9337
chr7	16364452	16365452	0.9337
chr12	72648914	72649914	0.9335
chr2	31068381	31069381	0.9331
chr10	4107139	4108139	0.9329
chr10	17576495	17577495	0.9329
chr10	77199156	77200156	0.9328
chr2	181916696	181917696	0.9327
chr7	6760290	6761290	0.9325
chr7	30462982	30463982	0.9325
chr4	57919829	57920829	0.9324
chr5	118435892	118436892	0.9322
chr12	110504891	110505891	0.932
chr13	97432346	97433346	0.932
chr13	89661296	89662296	0.9318
chr12	118766028	118767028	0.9314
chr2	169727801	169728801	0.9314
chr10	85050356	85051356	0.9312
chr19	29285611	29286611	0.9311
chr10	23805795	23806795	0.9308
chr12	73085014	73086014	0.9308
chr1	34103156	34104156	0.9306
chr6	7752801	7753801	0.9303
chr11	101772387	101773387	0.9301
chr6	91710107	91711107	0.9297
chr6	80589207	80590207	0.9295
chr2	146630365	146631365	0.9294
chr1	136694324	136695324	0.9292
chr10	84554056	84555056	0.9291
chr19	33179011	33180011	0.9291
chr16	65648556	65649556	0.929
chr1	71035627	71036627	0.9289
chr14	122433279	122434279	0.9287
chr16	12960408	12961408	0.9283
chr16	84768356	84769356	0.9283
chr8	89015802	89016802	0.9283
chr2	166157101	166158101	0.9281
chr13	109632705	109633705	0.9279
chr19	4849601	4850601	0.9278
chr2	119856765	119857765	0.9277
chr6	37689001	37690001	0.9277
chr12	56298314	56299314	0.9275
chr10	3941239	3942239	0.9274
chr6	5008801	5009801	0.9274
chr14	63501164	63502164	0.9273
chr4	99642310	99643310	0.9272
chr1	86310426	86311426	0.927
chr3	153675537	153676537	0.9265
chr8	88992002	88993002	0.9265
chr14	63501864	63502864	0.9261
chrX	52759124	52760124	0.9261
chr6	133987283	133988283	0.9259
chr8	65208802	65209802	0.9257
chr17	70746861	70747861	0.9255
chr2	172515901	172516901	0.9255
chr4	142170986	142171986	0.9255
chr7	3212300	3213300	0.9253
chr13	44704632	44705632	0.9251
chr17	43981952	43982952	0.9248
chr4	119025696	119026696	0.9247
chr10	60165353	60166353	0.9246
chr17	88346661	88347661	0.9246
chr19	57576811	57577811	0.9246
chr5	18688583	18689583	0.9245
chr3	18623401	18624401	0.9244
chr7	107348487	107349487	0.9241
chr6	122701883	122702883	0.924
chr18	20489400	20490400	0.9239
chr9	78370894	78371894	0.9239
chr17	31806156	31807156	0.9238
chr2	87480644	87481644	0.9238
chr17	45456852	45457852	0.9236
chr6	65796107	65797107	0.9236
chr15	98991370	98992370	0.9235
chr16	88719856	88720856	0.9234
chr5	97225882	97226882	0.9234
chr14	29951115	29952115	0.9229
chr1	36054756	36055756	0.9228
chr9	37484916	37485916	0.9228
chr10	78047556	78048556	0.9226
chr14	60957364	60958364	0.9226
chr10	68136953	68137953	0.922
chrX	52348224	52349224	0.9216
chr2	181917396	181918396	0.9215
chr19	3842301	3843301	0.9214
chr9	58271794	58272794	0.9214
chr15	52012555	52013555	0.9211
chr17	10365936	10366936	0.9211
chr17	66478961	66479961	0.9209
chr2	131882065	131883065	0.9209
chr7	89975791	89976791	0.9207
chr3	129216783	129217783	0.9202
chr19	23094111	23095111	0.9201
chr18	76594662	76595662	0.9199
chr6	125447283	125448283	0.9197
chr8	90904402	90905402	0.9197
chr5	50122862	50123862	0.9196
chr6	97102207	97103207	0.9193
chr2	32173681	32174681	0.9192
chr12	71296514	71297514	0.9191
chr13	58954840	58955840	0.9191
chr5	38658262	38659262	0.9191
chr8	86775102	86776102	0.9191
chr2	156690765	156691765	0.9189
chr1	152915871	152916871	0.9186
chr12	78996514	78997514	0.9184
chr10	95175267	95176267	0.9179
chr2	75861344	75862344	0.9178
chr2	146299265	146300265	0.9176
chr1	36054056	36055056	0.9174
chr3	63842179	63843179	0.9174
chr3	133518337	133519337	0.9174
chr4	10399254	10400254	0.9172
chr11	88689387	88690387	0.9171
chr5	150804826	150805826	0.917
chr2	59633244	59634244	0.9169
chr13	48159832	48160832	0.9168
chr8	63928804	63929804	0.9168
chr11	20320898	20321898	0.9166
chr16	22403428	22404428	0.9166
chr17	87470961	87471961	0.9165
chr14	19860879	19861879	0.9164
chr9	18722457	18723457	0.9164
chr2	165981401	165982401	0.9162
chr9	31018316	31019316	0.9162
chr17	29450656	29451656	0.9161
chr17	79364961	79365961	0.9161
chr7	133112118	133113118	0.916
chr1	59448057	59449057	0.9158
chr9	120708583	120709583	0.9157
chr11	66932899	66933899	0.9155
chr11	120663287	120664287	0.9155
chr6	122339983	122340983	0.9153
chr11	107435387	107436387	0.9152
chr3	122295183	122296183	0.9151
chr12	21462440	21463440	0.915
chr2	116979765	116980765	0.915
chr5	26692061	26693061	0.9149
chr7	140958602	140959602	0.9149
chr1	11501820	11502820	0.9146
chr15	37976646	37977646	0.9146
chr9	121335083	121336083	0.9145
chr5	119679092	119680092	0.9139
chr1	72213727	72214727	0.9138
chr1	186513922	186514922	0.9137
chr13	47855332	47856332	0.9137
chr7	4820299	4821299	0.9137
chr10	88708556	88709556	0.9135
chr7	133114218	133115218	0.9135
chr19	7260811	7261811	0.9133
chr8	111788901	111789901	0.9133
chr5	33535252	33536252	0.9131
chr12	41386114	41387114	0.913
chr2	65421544	65422544	0.9129
chr10	77198456	77199456	0.9127
chr3	90451979	90452979	0.9123
chr8	34727247	34728247	0.9122
chr1	135553324	135554324	0.912
chr10	18422795	18423795	0.912
chrX	58039124	58040124	0.912
chr1	152915171	152916171	0.9119
chr19	25488811	25489811	0.9118
chr19	53448911	53449911	0.9117
chr3	19707001	19708001	0.9116
chr4	83329997	83330997	0.9115
chr10	27994595	27995595	0.9113
chr15	96244570	96245570	0.9109
chr3	73434279	73435279	0.9107
chr3	96674978	96675978	0.9107
chr3	9008301	9009301	0.9106
chr8	90903702	90904702	0.9105
chr10	95595967	95596967	0.9104
chr7	3203200	3204200	0.9103
chr6	81771507	81772507	0.9102
chr13	44705332	44706332	0.9101
chr17	80801361	80802361	0.9099
chr11	57970099	57971099	0.9097
chr2	172576801	172577801	0.9094
chr3	88574579	88575579	0.9094
chr2	57255690	57256690	0.9092
chr2	116976965	116977965	0.9091
chr5	134941231	134942231	0.9088
chr9	24160057	24161057	0.9087
chr10	59353353	59354353	0.9086
chr8	4365901	4366901	0.9081
chr1	153008971	153009971	0.908
chr8	72333402	72334402	0.908
chr2	8498674	8499674	0.9079
chr18	47492847	47493847	0.9078
chr4	33823826	33824826	0.9077
chr6	108258107	108259107	0.9077
chr3	52253679	52254679	0.9075
chr5	97218182	97219182	0.9075
chr12	86898951	86899951	0.9074
chr19	14655611	14656611	0.9074
chr3	41422579	41423579	0.9074
chrX	13013775	13014775	0.9073
chr1	156669570	156670570	0.907
chr19	32963411	32964411	0.9069
chr10	61928653	61929653	0.9065
chr14	47572526	47573526	0.9065
chr4	45770629	45771629	0.9065
chr9	65618994	65619994	0.9065
chr9	78369494	78370494	0.9065
chr4	45771329	45772329	0.9064
chr1	63138227	63139227	0.9063
chr16	33844215	33845215	0.9063
chr3	101163378	101164378	0.9063
chr13	109776193	109777193	0.9062
chr2	10334074	10335074	0.9061
chr19	55543311	55544311	0.906
chr3	34761579	34762579	0.9059
chr11	80137699	80138699	0.9058
chr5	59941062	59942062	0.9058
chr10	4492139	4493139	0.9056
chr18	35757347	35758347	0.9056
chr16	46046588	46047588	0.9055
chr18	13712692	13713692	0.9055
chr2	93927644	93928644	0.9055
chr6	136468880	136469880	0.9055
chr18	75345147	75346147	0.9054
chr4	142165386	142166386	0.9053
chr17	31263656	31264656	0.9052
chr17	51839176	51840176	0.9052
chr10	77193556	77194556	0.905
chr1	74824727	74825727	0.9047
chr13	14426434	14427434	0.9047
chr15	79933871	79934871	0.9047
chr19	27904511	27905511	0.9047
chr4	130639886	130640886	0.9045
chr10	62893953	62894953	0.9044
chr7	38029982	38030982	0.9044
chr13	44722132	44723132	0.9041
chr14	54411664	54412664	0.9039
chr16	8777908	8778908	0.9038
chr15	7530901	7531901	0.9037
chr19	10972211	10973211	0.9028
chr19	3841601	3842601	0.9026
chr5	92111675	92112675	0.9025
chr8	83160302	83161302	0.9024
chr1	72229127	72230127	0.9023
chr10	95455967	95456967	0.9023
chr13	52561432	52562432	0.9023
chr11	62510299	62511299	0.9022
chr6	54096307	54097307	0.9021
chr4	86241297	86242297	0.902
chr11	30750201	30751201	0.9018
chr18	38148547	38149547	0.9017
chr8	106450701	106451701	0.9015
chr10	75881056	75882056	0.9012
chr6	65023307	65024307	0.9011
chr10	85538956	85539956	0.9009
chr16	20371328	20372328	0.9007
chr4	13095654	13096654	0.9006
chr11	117974587	117975587	0.9004
chr5	76321776	76322776	0.9004
chr6	72927007	72928007	0.9003
chr1	132470524	132471524	0.9002
chr18	35043347	35044347	0.9002
chr6	5018601	5019601	0.9002
chr7	80746415	80747415	0.9001
chr15	56742446	56743446	0.8999
chr10	30737195	30738195	0.8998
chr6	97520807	97521807	0.8998
chr10	95595267	95596267	0.8997
chr14	100108882	100109882	0.8996
chr3	122144683	122145683	0.8996
chr5	139167047	139168047	0.8996
chr18	3005801	3006801	0.8991
chr18	76595362	76596362	0.8991
chr7	132615818	132616818	0.8991
chr8	89067602	89068602	0.899
chr1	55108057	55109057	0.8989
chr1	160309570	160310570	0.8988
chr13	4771255	4772255	0.8988
chr2	71351244	71352244	0.8987
chr10	70364353	70365353	0.8984
chr1	134570524	134571524	0.8982
chr6	136468180	136469180	0.8982
chr2	165968101	165969101	0.8981
chr4	62249067	62250067	0.8979
chr1	156668170	156669170	0.8978
chr2	44524481	44525481	0.8978
chr3	95636179	95637179	0.8978
chr8	111613201	111614201	0.8977
chr11	54140399	54141399	0.8975
chr11	26170101	26171101	0.8974
chr17	70901561	70902561	0.8974
chr5	77261876	77262876	0.8974
chr4	55476129	55477129	0.8972
chr10	18422095	18423095	0.8971
chr10	3646539	3647539	0.8967
chr12	87288851	87289851	0.8966
chr14	27272215	27273215	0.8964
chr6	54097007	54098007	0.8964
chr15	16446046	16447046	0.8962
chr16	64885275	64886275	0.8962
chr6	149131879	149132879	0.8962
chr8	3414601	3415601	0.8962
chr11	30748801	30749801	0.896
chr12	86903151	86904151	0.8957
chr12	100533391	100534391	0.8957
chr19	46835311	46836311	0.8955
chr8	125700001	125701001	0.8955
chr11	54139699	54140699	0.8954
chr6	144360681	144361681	0.8954
chr15	30383046	30384046	0.8951
chr6	54854407	54855407	0.8951
chr6	142511281	142512281	0.8951
chr7	100699787	100700787	0.8948
chr4	98845710	98846710	0.8946
chr17	28593856	28594856	0.8945
chr8	36550047	36551047	0.8941
chr1	192454119	192455119	0.8939
chr6	143148981	143149981	0.8939
chr7	13013552	13014552	0.8936
chr10	118461145	118462145	0.8931
chr15	9898246	9899246	0.8931
chr4	110312096	110313096	0.893
chr10	21090495	21091495	0.8929
chr12	118766728	118767728	0.8927
chr17	63532652	63533652	0.8927
chr3	101714978	101715978	0.8925
chr1	60850857	60851857	0.8924
chr3	96675678	96676678	0.8924
chr5	26691361	26692361	0.8923
chr11	8588898	8589898	0.8922
chr17	86750661	86751661	0.8919
chr3	9009001	9010001	0.8918
chr10	93242456	93243456	0.8917
chrY	4150116	4151116	0.8916
chr13	102957621	102958621	0.8915
chr7	130600387	130601387	0.8913
chr11	20231298	20232298	0.8909
chr9	78359694	78360694	0.8909
chr1	20908420	20909420	0.8908
chr15	98990670	98991670	0.8908
chr15	101233470	101234470	0.8906
chr5	122191392	122192392	0.8906
chr19	47450611	47451611	0.8905
chr11	27799701	27800701	0.8904
chr5	110437682	110438682	0.8904
chr5	117396392	117397392	0.8904
chr19	25488111	25489111	0.8903
chr3	86844879	86845879	0.8903
chr11	67011299	67012299	0.8902
chr6	143155981	143156981	0.8899
chr6	122769783	122770783	0.8898
chr1	133019324	133020324	0.8897
chrX	13206275	13207275	0.8897
chr12	106175391	106176391	0.8896
chr16	17456508	17457508	0.8896
chr7	25263382	25264382	0.8895
chr13	44850932	44851932	0.8894
chr7	3210200	3211200	0.8894
chr7	82785391	82786391	0.8894
chr16	38407515	38408515	0.8893
chr17	7533036	7534036	0.8893
chr3	41496079	41497079	0.8893
chr5	103726082	103727082	0.8892
chr5	113330081	113331081	0.8892
chr1	20867120	20868120	0.889
chr9	114584283	114585283	0.889
chr7	134021418	134022418	0.8889
chr2	59633944	59634944	0.8887
chr3	11214001	11215001	0.8886
chr8	15844501	15845501	0.8884
chr13	16769067	16770067	0.8883
chr16	18724208	18725208	0.8882
chr9	78368794	78369794	0.8882
chr17	87471661	87472661	0.8881
chr18	34815147	34816147	0.8881
chr1	92347924	92348924	0.888
chr3	122145383	122146383	0.8879
chr9	114535983	114536983	0.8879
chr2	65420144	65421144	0.8878
chr3	129551383	129552383	0.8878
chr12	76964414	76965414	0.8877
chr8	111789601	111790601	0.8877
chr11	66919599	66920599	0.8876
chr12	12788495	12789495	0.8875
chr8	72310302	72311302	0.8875
chr8	106963101	106964101	0.8875
chr12	117683828	117684828	0.8873
chr15	81517971	81518971	0.8873
chr6	72787007	72788007	0.8873
chr4	138794186	138795186	0.8872
chr12	12983095	12984095	0.8869
chr1	11277120	11278120	0.8868
chr1	136677524	136678524	0.8868
chr3	22025079	22026079	0.8868
chr8	72315902	72316902	0.8868
chr5	53541662	53542662	0.8867
chr3	17489401	17490401	0.8864
chr6	37658201	37659201	0.8864
chr11	12468998	12469998	0.8863
chr14	122341579	122342579	0.8862
chr6	100335507	100336507	0.8861
chr13	48245232	48246232	0.886
chr13	54215532	54216532	0.886
chr4	145270898	145271898	0.886
chr17	76111361	76112361	0.8858
chr8	118795901	118796901	0.8858
chr2	116978365	116979365	0.8853
chr19	30505011	30506011	0.8851
chr7	120157787	120158787	0.8851
chr7	3213700	3214700	0.8848
chr1	60850157	60851157	0.8847
chrX	58041924	58042924	0.8847
chr5	64500162	64501162	0.8845
chr6	61430907	61431907	0.8844
chr17	43035552	43036552	0.8843
chr6	30151401	30152401	0.8842
chr1	77453526	77454526	0.8841
chr2	134959965	134960965	0.884
chr4	130639186	130640186	0.884
chr9	10448901	10449901	0.8838
chr14	76494494	76495494	0.8837
chr6	80589907	80590907	0.8836
chr19	11299111	11300111	0.8833
chr3	30723979	30724979	0.8833
chr4	115811996	115812996	0.8833
chr14	18665987	18666987	0.8832
chr16	82595556	82596556	0.8831
chr7	98188191	98189191	0.8831
chr4	76014297	76015297	0.883
chr10	61314753	61315753	0.8828
chr18	69782247	69783247	0.8828
chr9	96229882	96230882	0.8828
chr6	5118701	5119701	0.8827
chrX	101480862	101481862	0.8827
chr11	55956899	55957899	0.8826
chr12	104763491	104764491	0.8826
chr2	58604590	58605590	0.8826
chr2	75873244	75874244	0.8826
chr1	84176326	84177326	0.8825
chr15	77355071	77356071	0.8825
chr18	5011303	5012303	0.8824
chr5	117403392	117404392	0.8824
chr11	71501799	71502799	0.8823
chr10	67100253	67101253	0.8821
chr6	136489880	136490880	0.882
chr9	40793318	40794318	0.882
chr3	41421879	41422879	0.8819
chr7	6258099	6259099	0.8819
chr4	53840229	53841229	0.8818
chr18	35137847	35138847	0.8817
chr8	83739902	83740902	0.8816
chr8	128042901	128043901	0.8808
chr1	12745020	12746020	0.8807
chr10	12607903	12608903	0.8807
chr2	149982665	149983665	0.8806
chr6	34343701	34344701	0.8805
chr8	78492702	78493702	0.8805
chrX	52348924	52349924	0.8805
chr15	96702370	96703370	0.8803
chr4	148599592	148600592	0.8803
chr9	45348918	45349918	0.8802
chr11	88583199	88584199	0.8801
chr14	99509682	99510682	0.8799
chr16	48435688	48436688	0.8799
chr17	45465252	45466252	0.8798
chr16	17219208	17220208	0.8797
chr19	38348511	38349511	0.8797
chr11	62214899	62215899	0.8796
chr2	129178665	129179665	0.8796
chr9	20982757	20983757	0.8796
chr10	95220067	95221067	0.8794
chr18	67497447	67498447	0.8794
chr4	57920529	57921529	0.8794
chr14	122342279	122343279	0.879
chr11	46067999	46068999	0.8787
chr7	130887387	130888387	0.8787
chr2	149983365	149984365	0.8783
chr5	20973383	20974383	0.8783
chr1	59487257	59488257	0.878
chr14	99338882	99339882	0.8779
chr2	26442781	26443781	0.8779
chr4	84528397	84529397	0.8778
chr7	65873515	65874515	0.8777
chr19	38347811	38348811	0.8772
chr11	116426887	116427887	0.8771
chr4	45590729	45591729	0.8771
chr1	71645327	71646327	0.877
chr3	95663478	95664478	0.877
chr11	117972487	117973487	0.8769
chr13	109676789	109677789	0.8766
chr5	134970631	134971631	0.8765
chr16	48474888	48475888	0.8764
chr16	13749308	13750308	0.8763
chr17	31808256	31809256	0.8763
chr1	36014156	36015156	0.8762
chr7	80013515	80014515	0.8762
chr19	16491711	16492711	0.8761
chr8	36593447	36594447	0.8761
chr9	118537183	118538183	0.8761
chr4	84660697	84661697	0.876
chr1	100877424	100878424	0.8759
chr10	117717045	117718045	0.8759
chr16	82596256	82597256	0.8758
chr12	86804451	86805451	0.8754
chr16	25516315	25517315	0.8754
chr4	43389229	43390229	0.8754
chr13	23595432	23596432	0.8753
chr13	114304493	114305493	0.8752
chr16	30939915	30940915	0.8752
chr2	152177165	152178165	0.875
chr8	126557501	126558501	0.875
chr16	72071756	72072756	0.8749
chr17	80635461	80636461	0.8749
chr7	6409591	6410591	0.8749
chr8	83315702	83316702	0.8749
chr14	76455994	76456994	0.8748
chr11	68393799	68394799	0.8747
chr2	116979065	116980065	0.8746
chr7	89975091	89976091	0.8746
chrX	8206875	8207875	0.8746
chr1	119073224	119074224	0.8745
chr13	73099353	73100353	0.8744
chr5	38696062	38697062	0.8739
chr10	66897253	66898253	0.8738
chr7	112690887	112691887	0.8738
chr13	67844564	67845564	0.8737
chr4	12663054	12664054	0.8737
chr8	109817001	109818001	0.8735
chr5	101712882	101713882	0.8734
chr19	23132611	23133611	0.8733
chr13	37773232	37774232	0.873
chr17	37078556	37079556	0.8728
chr4	127227157	127228157	0.8728
chr1	154100271	154101271	0.8726
chr12	71052914	71053914	0.8724
chr1	133694124	133695124	0.8723
chr14	49447126	49448126	0.8723
chr3	72858879	72859879	0.8723
chr6	67112807	67113807	0.8723
chr3	102189578	102190578	0.8722
chr5	103724682	103725682	0.8722
chr11	20164798	20165798	0.8721
chr8	65063902	65064902	0.8721
chr10	67083453	67084453	0.872
chr4	82430497	82431497	0.8719
chr8	47337847	47338847	0.8719
chr13	114050393	114051393	0.8716
chr2	163030665	163031665	0.8716
chr9	66896494	66897494	0.8716
chr14	76629594	76630594	0.8715
chr9	61222294	61223294	0.8713
chr18	77559962	77560962	0.8712
chr4	29091351	29092351	0.8712
chr4	127226457	127227457	0.8712
chr8	70647102	70648102	0.8712
chr9	21768157	21769157	0.8712
chr14	105900684	105901684	0.8711
chr19	41013411	41014411	0.8711
chr1	36962656	36963656	0.8709
chr16	38471919	38472919	0.8709
chr6	4980101	4981101	0.8707
chr6	65764607	65765607	0.8704
chr3	81102079	81103079	0.8703
chrX	143543058	143544058	0.8703
chr2	124144965	124145965	0.8701
chr1	4972220	4973220	0.8699
chr2	71652244	71653244	0.8699
chr10	17575795	17576795	0.8698
chr14	29950415	29951415	0.8698
chr3	68565079	68566079	0.8697
chr5	118444992	118445992	0.8697
chr5	137046131	137047131	0.8697
chr13	52252032	52253032	0.8696
chr13	114260393	114261393	0.8695
chr2	135614465	135615465	0.8693
chr12	55505214	55506214	0.8692
chr14	11663187	11664187	0.8692
chr15	25723846	25724846	0.8692
chr15	8697801	8698801	0.869
chr19	42321711	42322711	0.869
chr16	90275956	90276956	0.8689
chr18	37771247	37772247	0.8689
chr1	185105522	185106522	0.8685
chr2	166193501	166194501	0.8684
chr1	140429524	140430524	0.8683
chr10	96720867	96721867	0.8683
chr1	139494324	139495324	0.8682
chr13	94647746	94648746	0.8682
chr16	16088008	16089008	0.868
chr11	4806098	4807098	0.8679
chr11	80888799	80889799	0.8677
chr2	170771501	170772501	0.8676
chr12	39998014	39999014	0.8675
chr9	120679183	120680183	0.8675
chr6	125591483	125592483	0.8674
chr8	56218304	56219304	0.8674
chr10	79840956	79841956	0.8673
chr4	150591092	150592092	0.8673
chr6	39426402	39427402	0.8673
chr3	8246001	8247001	0.8672
chr15	55264046	55265046	0.867
chr8	105233401	105234401	0.867
chr4	22047254	22048254	0.8669
chr11	69468999	69469999	0.8668
chr12	12803895	12804895	0.8668
chr8	125479501	125480501	0.8668
chr11	23096401	23097401	0.8667
chr17	85142761	85143761	0.8667
chr9	113192683	113193683	0.8667
chr12	87317551	87318551	0.8666
chr3	157320437	157321437	0.8666
chr1	11330320	11331320	0.8665
chr1	156995070	156996070	0.8663
chr11	8635798	8636798	0.8663
chr2	171231401	171232401	0.8662
chr8	111943601	111944601	0.8661
chr10	117805245	117806245	0.866
chr5	102904982	102905982	0.866
chr1	131890924	131891924	0.8659
chr19	27903811	27904811	0.8659
chr2	34921181	34922181	0.8658
chr5	119706392	119707392	0.8658
chr12	110471291	110472291	0.8657
chr5	147760625	147761625	0.8656
chr11	76350699	76351699	0.8655
chr2	171279001	171280001	0.8655
chr8	89066902	89067902	0.8655
chr8	24571129	24572129	0.8654
chr2	156199365	156200365	0.8653
chr1	136695024	136696024	0.8651
chr15	25753946	25754946	0.8651
chr5	64499462	64500462	0.8651
chr12	12982395	12983395	0.865
chr13	44677332	44678332	0.865
chr19	44281011	44282011	0.865
chr15	92963670	92964670	0.8649
chr2	154425565	154426565	0.8649
chr6	4739301	4740301	0.8649
chr17	11533535	11534535	0.8648
chr13	109632005	109633005	0.8647
chr17	31811056	31812056	0.8644
chr7	107339387	107340387	0.8644
chr10	4492839	4493839	0.8641
chr13	107660921	107661921	0.8641
chr10	75881756	75882756	0.8639
chr11	80132099	80133099	0.8638
chr6	83890407	83891407	0.8638
chr7	58224031	58225031	0.8637
chr19	32254311	32255311	0.8636
chr10	85451456	85452456	0.8635
chr18	37877647	37878647	0.8633
chr10	44684695	44685695	0.8632
chr16	13747908	13748908	0.8632
chr3	22155979	22156979	0.8632
chr2	174664900	174665900	0.8631
chr2	102121144	102122144	0.863
chr8	45063547	45064547	0.863
chr4	99640910	99641910	0.8628
chr7	133095318	133096318	0.8628
chr10	21130395	21131395	0.8625
chr3	137779237	137780237	0.8624
chr11	20138198	20139198	0.8621
chr6	72808007	72809007	0.8621
chr10	130293945	130294945	0.8619
chr11	62494199	62495199	0.8619
chr17	43711752	43712752	0.8619
chr4	133121386	133122386	0.8619
chr19	40272811	40273811	0.8618
chr2	51049181	51050181	0.8617
chr2	109578944	109579944	0.8617
chr10	43043195	43044195	0.8616
chr11	49805999	49806999	0.8616
chr12	3602201	3603201	0.8616
chr1	36013456	36014456	0.8615
chr17	70772761	70773761	0.8614
chr4	136485586	136486586	0.8613
chr12	12786395	12787395	0.8612
chr10	44390695	44391695	0.8611
chrX	52166924	52167924	0.8611
chr1	100878124	100879124	0.861
chr3	101714278	101715278	0.861
chr4	98840810	98841810	0.8609
chr13	97587746	97588746	0.8607
chr5	53554962	53555962	0.8607
chr16	25050115	25051115	0.8606
chr7	25303282	25304282	0.8606
chr14	48653326	48654326	0.8605
chr14	124033479	124034479	0.8605
chr5	37330362	37331362	0.8605
chr15	62958446	62959446	0.8603
chr1	60851557	60852557	0.8602
chr1	84177026	84178026	0.8602
chr8	111648901	111649901	0.8602
chr2	106750944	106751944	0.8601
chr4	53339029	53340029	0.86
chr11	9116698	9117698	0.8598
chr17	47331452	47332452	0.8598
chr10	41466795	41467795	0.8597
chr11	59510799	59511799	0.8597
chr17	7240152	7241152	0.8597
chr3	103145078	103146078	0.8597
chr14	99510382	99511382	0.8595
chr12	73088514	73089514	0.8592
chr18	46714447	46715447	0.8591
chr3	101713578	101714578	0.8591
chr16	31343115	31344115	0.8589
chr2	181918096	181919096	0.8589
chr10	36935695	36936695	0.8588
chr6	31896501	31897501	0.8587
chr2	144714465	144715465	0.8586
chr11	11881698	11882698	0.8585
chr9	118537883	118538883	0.8585
chr3	25127479	25128479	0.8584
chrX	60169224	60170224	0.8583
chr4	108218396	108219396	0.8581
chrX	103252562	103253562	0.8581
chr1	160734470	160735470	0.8579
chr10	44434795	44435795	0.8576
chr8	85473102	85474102	0.8576
chr5	53554262	53555262	0.8575
chr17	33138956	33139956	0.8574
chr18	82778509	82779509	0.8573
chr4	142064586	142065586	0.8572
chr10	21828995	21829995	0.8571
chr1	191661022	191662022	0.8569
chr10	120170545	120171545	0.8567
chr8	65208102	65209102	0.8566
chr12	99299291	99300291	0.8565
chr17	85101461	85102461	0.8565
chr12	70710614	70711614	0.8564
chr16	59543575	59544575	0.8564
chr10	62476753	62477753	0.8563
chr2	87481344	87482344	0.8563
chr10	37231095	37232095	0.856
chr12	54178014	54179014	0.8558
chr12	104998691	104999691	0.8558
chr16	46500188	46501188	0.8558
chr5	104433082	104434082	0.8558
chr4	26944454	26945454	0.8557
chr10	12608603	12609603	0.8556
chr13	44727732	44728732	0.8556
chr2	128240665	128241665	0.8556
chr2	20722074	20723074	0.8554
chr6	92246307	92247307	0.8554
chr17	36974256	36975256	0.8552
chr1	86311126	86312126	0.8549
chr10	75937756	75938756	0.8548
chr1	136569724	136570724	0.8547
chr1	154080671	154081671	0.8547
chr2	163052365	163053365	0.8547
chr10	3891539	3892539	0.8546
chr10	61414853	61415853	0.8545
chr6	125503983	125504983	0.8545
chr7	130251787	130252787	0.8542
chrX	162832369	162833369	0.8542
chr10	117805945	117806945	0.8541
chr17	45456152	45457152	0.8539
chr6	4979401	4980401	0.8539
chrX	11926675	11927675	0.8538
chr13	97589146	97590146	0.8537
chr15	8090201	8091201	0.8536
chr10	56380295	56381295	0.8535
chr8	111650301	111651301	0.8535
chr10	21826895	21827895	0.8533
chr3	136115337	136116337	0.8531
chr1	4970120	4971120	0.853
chr2	59622044	59623044	0.853
chr2	60050444	60051444	0.853
chr5	113596847	113597847	0.853
chr9	17874757	17875757	0.853
chr5	144912632	144913632	0.8529
chr9	110959997	110960997	0.8529
chr1	36883556	36884556	0.8527
chr3	7578901	7579901	0.8527
chr5	122190692	122191692	0.8527
chr3	101162678	101163678	0.8526
chr14	122254779	122255779	0.8524
chr10	112400545	112401545	0.8523
chrX	101396162	101397162	0.8523
chr13	5803055	5804055	0.8521
chrX	52760524	52761524	0.852
chr5	129269926	129270926	0.8519
chr12	41558314	41559314	0.8518
chr3	68564379	68565379	0.8518
chr1	186510422	186511422	0.8516
chr10	36611595	36612595	0.8516
chr14	116897679	116898679	0.8516
chr4	28966751	28967751	0.8516
chr18	67341347	67342347	0.8515
chr4	66330067	66331067	0.8514
chr11	7532598	7533598	0.8513
chr16	8772308	8773308	0.8513
chr2	71655044	71656044	0.8513
chr4	117372996	117373996	0.8513
chr19	21818011	21819011	0.8511
chr8	125702101	125703101	0.8509
chr19	37880911	37881911	0.8508
chr3	103126878	103127878	0.8508
chr8	45235047	45236047	0.8508
chr1	191392922	191393922	0.8506
chr2	163032065	163033065	0.8506
chr6	35235501	35236501	0.8506
chr7	49348031	49349031	0.8505
chr13	44085832	44086832	0.8504
chr16	38557988	38558988	0.8502
chr11	79001599	79002599	0.8501
chr18	77560662	77561662	0.8501
chr1	88812926	88813926	0.8499
chr13	113730493	113731493	0.8499
chr7	80745715	80746715	0.8498
chr5	97226582	97227582	0.8497
chr10	108291545	108292545	0.8495
chr13	97580046	97581046	0.8495
chr2	17989274	17990274	0.8495
chrX	58013224	58014224	0.8495
chr2	128239965	128240965	0.8494
chr1	84860226	84861226	0.8493
chr2	166194201	166195201	0.8491
chr12	61609914	61610914	0.849
chr4	83329297	83330297	0.849
chr11	25473601	25474601	0.8489
chr12	110687591	110688591	0.8489
chr19	32194811	32195811	0.8489
chrX	86016162	86017162	0.8489
chr10	108432245	108433245	0.8488
chr17	14817794	14818794	0.8487
chr3	103378878	103379878	0.8487
chr11	11097698	11098698	0.8486
chr16	93463056	93464056	0.8486
chr8	107287201	107288201	0.8486
chr15	55877246	55878246	0.8485
chr19	53372611	53373611	0.8485
chr5	118444292	118445292	0.8485
chr15	7115101	7116101	0.8484
chr1	71672627	71673627	0.8483
chr10	12572203	12573203	0.8483
chr14	21486279	21487279	0.8483
chr3	109567883	109568883	0.8483
chr14	12114687	12115687	0.8481
chr6	35236201	35237201	0.8481
chr9	28552216	28553216	0.848
chr4	13096354	13097354	0.8478
chr11	102329587	102330587	0.8477
chr5	72464762	72465762	0.8477
chr3	34007679	34008679	0.8476
chr6	31370801	31371801	0.8475
chr1	36061056	36062056	0.8473
chr12	86816351	86817351	0.8473
chr17	79364261	79365261	0.8473
chr19	7261511	7262511	0.8472
chr2	169888101	169889101	0.8472
chr5	122851492	122852492	0.8472
chr6	112982407	112983407	0.8472
chr1	150496671	150497671	0.847
chr4	98845010	98846010	0.847
chr13	94706546	94707546	0.8467
chr4	126248557	126249557	0.8467
chr4	119008196	119009196	0.8466
chr3	28842379	28843379	0.8464
chr14	8403287	8404287	0.8462
chr16	84779556	84780556	0.8462
chr7	70788215	70789215	0.8462
chr7	130890887	130891887	0.8462
chr12	41052914	41053914	0.8461
chr3	137779937	137780937	0.846
chr6	52076802	52077802	0.8459
chr11	20227098	20228098	0.8458
chr15	10722846	10723846	0.8458
chr18	38628047	38629047	0.8458
chr17	90031561	90032561	0.8457
chr1	38823256	38824256	0.8455
chr1	160209470	160210470	0.8455
chr10	5560339	5561339	0.8455
chr15	50900955	50901955	0.8455
chr16	48608588	48609588	0.8455
chr2	129798165	129799165	0.8455
chr17	65743261	65744261	0.8453
chr5	134339931	134340931	0.8453
chr9	54098394	54099394	0.8452
chr7	44375231	44376231	0.8451
chr1	35944156	35945156	0.845
chr11	63180199	63181199	0.845
chr15	39646355	39647355	0.845
chr13	114025893	114026893	0.8449
chr5	106773182	106774182	0.8447
chr17	70772061	70773061	0.8445
chr15	88683871	88684871	0.8443
chr14	27347115	27348115	0.8441
chr6	7822801	7823801	0.8441
chr8	18480001	18481001	0.8441
chr17	31307056	31308056	0.844
chr2	135071965	135072965	0.844
chr14	58100664	58101664	0.8439
chr5	131490231	131491231	0.8439
chr13	51920232	51921232	0.8438
chr4	123634758	123635758	0.8438
chr5	74800076	74801076	0.8438
chr12	54102414	54103414	0.8437
chr11	53799499	53800499	0.8436
chr1	51535957	51536957	0.8435
chr13	98579646	98580646	0.8435
chr3	51128079	51129079	0.8432
chr3	102083878	102084878	0.8432
chr10	59558453	59559453	0.843
chr2	152803665	152804665	0.843
chr2	51049881	51050881	0.8428
chr7	79210615	79211615	0.8427
chr7	79211315	79212315	0.8427
chr16	31326315	31327315	0.8426
chr18	75344447	75345447	0.8425
chr5	101713582	101714582	0.8425
chr14	60652864	60653864	0.8424
chr18	46713047	46714047	0.842
chr3	53649479	53650479	0.8419
chr4	135581186	135582186	0.8419
chr5	129966331	129967331	0.8419
chr11	60414499	60415499	0.8418
chr4	53339729	53340729	0.8418
chr13	117262694	117263694	0.8416
chr15	52011855	52012855	0.8416
chr6	89287407	89288407	0.8416
chr1	119075324	119076324	0.8415
chr11	44766699	44767699	0.8415
chr11	96189887	96190887	0.8415
chr9	102999771	103000771	0.8414
chr4	62256767	62257767	0.8413
chr6	122766283	122767283	0.8412
chr7	46760831	46761831	0.8412
chr2	154465465	154466465	0.8411
chr12	4897395	4898395	0.841
chr4	137777786	137778786	0.841
chr8	44978847	44979847	0.8409
chr12	86466351	86467351	0.8408
chr11	47640199	47641199	0.8406
chr14	67760044	67761044	0.8405
chr5	110436982	110437982	0.8405
chr3	96574178	96575178	0.8403
chr8	72335502	72336502	0.8403
chr10	108287345	108288345	0.8402
chr1	86187226	86188226	0.8401
chr18	67340647	67341647	0.8401
chr13	34144432	34145432	0.8399
chr5	127688231	127689231	0.8398
chr16	92215656	92216656	0.8397
chr1	128400024	128401024	0.8396
chr19	44048611	44049611	0.8396
chr4	116781496	116782496	0.8396
chr7	107349187	107350187	0.8396
chr10	45072495	45073495	0.8395
chr10	18417895	18418895	0.8394
chr6	39540502	39541502	0.8394
chr6	143156681	143157681	0.8394
chr9	49751196	49752196	0.8394
chr11	62872899	62873899	0.8393
chr13	112770093	112771093	0.8393
chr3	103146478	103147478	0.8392
chr9	77616294	77617294	0.8392
chr13	67843864	67844864	0.8391
chr6	31239901	31240901	0.8391
chr3	119094783	119095783	0.8389
chr1	62181327	62182327	0.8388
chr19	47449911	47450911	0.8388
chr5	25554883	25555883	0.8388
chr3	102083178	102084178	0.8387
chr2	71188144	71189144	0.8386
chr3	157932237	157933237	0.8386
chr5	22572883	22573883	0.8386
chr7	95479891	95480891	0.8385
chr9	114583583	114584583	0.8385
chr14	121505779	121506779	0.8384
chr10	112399845	112400845	0.8383
chr8	73336502	73337502	0.8383
chr14	122267379	122268379	0.8382
chr7	130886687	130887687	0.8381
chr3	121542683	121543683	0.838
chr9	50981096	50982096	0.838
chr2	166208201	166209201	0.8379
chr7	107237187	107238187	0.8379
chr2	69048244	69049244	0.8378
chr10	9084803	9085803	0.8376
chr1	137263424	137264424	0.8375
chr17	26596756	26597756	0.8375
chr4	72145667	72146667	0.8375
chr15	103363570	103364570	0.8374
chr15	100263270	100264270	0.8373
chr2	152792465	152793465	0.8373
chr1	4970820	4971820	0.8372
chr13	40863032	40864032	0.8372
chr16	13950908	13951908	0.8372
chr12	99341991	99342991	0.8371
chr18	73780647	73781647	0.8371
chr19	42135511	42136511	0.8371
chr10	102371967	102372967	0.837
chr11	6894898	6895898	0.837
chrX	58013924	58014924	0.8369
chr2	84837444	84838444	0.8368
chr6	30159101	30160101	0.8368
chr11	23802001	23803001	0.8366
chr13	44721432	44722432	0.8366
chr14	99354982	99355982	0.8366
chr2	20549874	20550874	0.8366
chr15	39728955	39729955	0.8365
chr14	121329379	121330379	0.8364
chr7	38027882	38028882	0.8363
chr16	38471219	38472219	0.8361
chr4	105460396	105461396	0.8359
chr4	82447297	82448297	0.8358
chr9	90833563	90834563	0.8357
chr16	29664515	29665515	0.8356
chr14	49361726	49362726	0.8355
chr10	100066167	100067167	0.8354
chr17	47571552	47572552	0.8354
chr19	21817311	21818311	0.8353
chr12	53474514	53475514	0.8352
chr18	41936247	41937247	0.8352
chr17	70900161	70901161	0.8351
chr3	127544483	127545483	0.835
chr1	136695724	136696724	0.8349
chr8	123993401	123994401	0.8349
chr17	36998056	36999056	0.8346
chr2	157376065	157377065	0.8346
chr4	125534557	125535557	0.8345
chr12	35641829	35642829	0.8343
chr10	60166053	60167053	0.8342
chr10	93188556	93189556	0.8342
chr6	65796807	65797807	0.8342
chr1	88668726	88669726	0.834
chr7	139949202	139950202	0.834
chr9	61667494	61668494	0.834
chr11	8586098	8587098	0.8338
chr18	33938047	33939047	0.8338
chr9	114536683	114537683	0.8337
chr13	113568793	113569793	0.8336
chr15	25761646	25762646	0.8336
chr15	82246671	82247671	0.8335
chr11	76484399	76485399	0.8333
chr18	77117562	77118562	0.8333
chr2	165969501	165970501	0.8332
chr7	96244291	96245291	0.8332
chr19	18609211	18610211	0.8331
chr19	38063611	38064611	0.833
chr7	128079687	128080687	0.833
chr18	54718947	54719947	0.8329
chr18	56688047	56689047	0.8329
chr3	126448983	126449983	0.8329
chr4	123655058	123656058	0.8329
chr19	34655311	34656311	0.8326
chr5	144085932	144086932	0.8326
chr11	50391199	50392199	0.8325
chr12	117047528	117048528	0.8325
chr6	122762083	122763083	0.8324
chr1	136674024	136675024	0.8323
chr10	68794953	68795953	0.8323
chr19	55556611	55557611	0.8323
chr11	8671498	8672498	0.8322
chr11	101682087	101683087	0.8321
chr9	74997594	74998594	0.8321
chr1	118689624	118690624	0.8319
chr5	116407992	116408992	0.8319
chr7	58151231	58152231	0.8318
chr3	32762379	32763379	0.8317
chr9	58208794	58209794	0.8317
chr11	84276099	84277099	0.8316
chr4	105322496	105323496	0.8316
chr9	30573116	30574116	0.8316
chr16	25517015	25518015	0.8314
chr2	84518244	84519244	0.831
chr4	45654429	45655429	0.831
chr4	98847110	98848110	0.8309
chr13	40851132	40852132	0.8308
chr16	8757608	8758608	0.8307
chr4	108181996	108182996	0.8307
chr6	29020201	29021201	0.8306
chr7	114743987	114744987	0.8306
chr8	27903829	27904829	0.8306
chr8	64631604	64632604	0.8306
chr9	65640694	65641694	0.8305
chr19	29271611	29272611	0.8304
chr4	33338026	33339026	0.8304
chr5	106774582	106775582	0.8302
chr7	145138996	145139996	0.8302
chr1	56697057	56698057	0.8301
chr4	132648886	132649886	0.83
chr16	30641015	30642015	0.8299
chr16	30820915	30821915	0.8299
chr13	58280740	58281740	0.8298
chr3	93163079	93164079	0.8297
chr2	71654344	71655344	0.8296
chr10	36610895	36611895	0.8295
chr13	114278593	114279593	0.8295
chr2	30779281	30780281	0.8295
chr4	86045297	86046297	0.8295
chr10	4124639	4125639	0.8294
chr12	58473214	58474214	0.8293
chr19	56132711	56133711	0.8293
chr2	71650844	71651844	0.8292
chr5	73219362	73220362	0.8292
chr6	8345001	8346001	0.8292
chr1	166123070	166124070	0.8291
chr5	136933431	136934431	0.8291
chr1	119048724	119049724	0.829
chr17	37027456	37028456	0.829
chr2	129194065	129195065	0.829
chr5	64647862	64648862	0.829
chr9	8463001	8464001	0.8289
chr1	181952870	181953870	0.8288
chr7	81480715	81481715	0.8287
chr1	135173924	135174924	0.8286
chr9	119911283	119912283	0.8282
chr4	28967451	28968451	0.8279
chr15	97592770	97593770	0.8278
chr13	40862332	40863332	0.8275
chr2	20486174	20487174	0.8274
chr14	34359715	34360715	0.8273
chr18	82777109	82778109	0.8273
chr3	122938483	122939483	0.8272
chr4	148084392	148085392	0.8272
chr8	116674201	116675201	0.8272
chr8	43290447	43291447	0.827
chr15	5990901	5991901	0.8269
chr10	69859653	69860653	0.8267
chr14	122255479	122256479	0.8267
chr18	20945800	20946800	0.8267
chr3	135315937	135316937	0.8266
chr7	24459782	24460782	0.8266
chr10	121454345	121455345	0.8265
chr9	110952297	110953297	0.8263
chrX	52759824	52760824	0.8263
chr15	10687146	10688146	0.8262
chr2	74122544	74123544	0.826
chr9	92260163	92261163	0.826
chr14	49274926	49275926	0.8256
chr19	23087811	23088811	0.8256
chr10	62893253	62894253	0.8255
chr3	96832478	96833478	0.8255
chr14	122466879	122467879	0.8254
chr2	102109944	102110944	0.8252
chr1	186922022	186923022	0.8251
chr16	91384056	91385056	0.825
chr2	129177965	129178965	0.825
chr2	167058701	167059701	0.825
chr3	103208778	103209778	0.8248
chr1	192454819	192455819	0.8247
chr2	161166565	161167565	0.8247
chr11	30160101	30161101	0.8246
chr1	118642024	118643024	0.8245
chr14	76515494	76516494	0.8245
chr14	78883594	78884594	0.8245
chr11	80135599	80136599	0.824
chr18	37860147	37861147	0.824
chr2	74177144	74178144	0.824
chr17	37990656	37991656	0.8238
chr11	3144998	3145998	0.8235
chr14	118713479	118714479	0.8234
chrX	13012375	13013375	0.8234
chr6	142961381	142962381	0.8233
chr7	3192700	3193700	0.8232
chr4	153632592	153633592	0.8229
chr9	67207994	67208994	0.8229
chr10	40362895	40363895	0.8225
chr1	110774024	110775024	0.8224
chr18	12849592	12850592	0.8223
chr4	137597186	137598186	0.8222
chr14	27046815	27047815	0.8221
chr7	134022118	134023118	0.8221
chr11	17882798	17883798	0.822
chr6	122765583	122766583	0.8219
chr7	138850018	138851018	0.8219
chr1	180889570	180890570	0.8218
chr6	72926307	72927307	0.8218
chr15	62009946	62010946	0.8217
chr4	84527697	84528697	0.8217
chr10	61929353	61930353	0.8215
chr6	101979107	101980107	0.8215
chr1	131139124	131140124	0.8214
chr13	40851832	40852832	0.8214
chr6	6140001	6141001	0.8214
chr10	77192856	77193856	0.8213
chr6	89508607	89509607	0.8211
chr11	11941898	11942898	0.8209
chr4	123666258	123667258	0.8209
chr1	140434424	140435424	0.8208
chr17	29465356	29466356	0.8208
chr2	135559865	135560865	0.8208
chr4	106859696	106860696	0.8208
chr11	6038798	6039798	0.8207
chr11	107440987	107441987	0.8207
chr2	135656465	135657465	0.8207
chr4	100797696	100798696	0.8206
chr10	47517595	47518595	0.8204
chr19	29945711	29946711	0.8203
chr3	95645279	95646279	0.8203
chr15	74690871	74691871	0.8201
chr4	123543058	123544058	0.8201
chr1	131891624	131892624	0.82
chr17	83667861	83668861	0.8199
chr4	153233592	153234592	0.8199
chr13	63979493	63980493	0.8198
chr3	86846279	86847279	0.8198
chr1	34103856	34104856	0.8197
chr5	106773882	106774882	0.8197
chr18	13711992	13712992	0.8196
chr2	13696874	13697874	0.8196
chr5	73152162	73153162	0.8195
chr5	130186831	130187831	0.8195
chr16	26961815	26962815	0.8194
chr6	72794707	72795707	0.8194
chr11	65110099	65111099	0.8193
chr9	58278094	58279094	0.8192
chr14	12107687	12108687	0.8191
chr14	50979426	50980426	0.8191
chr13	97589846	97590846	0.819
chr15	39780755	39781755	0.819
chr11	77738099	77739099	0.8189
chr13	97580746	97581746	0.8189
chr4	130630786	130631786	0.8189
chr10	80050256	80051256	0.8188
chr11	88690087	88691087	0.8188
chr19	14834811	14835811	0.8187
chr10	59957453	59958453	0.8186
chr8	54076047	54077047	0.8185
chr5	147155125	147156125	0.8184
chr8	117241901	117242901	0.8184
chr4	142071586	142072586	0.8183
chr13	63968293	63969293	0.8182
chr4	91303910	91304910	0.8181
chr15	99871970	99872970	0.818
chr5	131526631	131527631	0.818
chrX	52745124	52746124	0.8179
chr1	127783324	127784324	0.8176
chr12	54101714	54102714	0.8176
chr15	77102371	77103371	0.8176
chr13	109778293	109779293	0.8175
chr12	72651014	72652014	0.8174
chr3	75647679	75648679	0.8174
chr13	20183632	20184632	0.8173
chr17	80449961	80450961	0.8173
chr8	40939147	40940147	0.8173
chr11	69704199	69705199	0.8172
chr13	31728732	31729732	0.8172
chr19	23121411	23122411	0.8172
chr2	134960665	134961665	0.8172
chr3	129574483	129575483	0.8172
chr3	129549283	129550283	0.8171
chr5	103726782	103727782	0.817
chr1	58957357	58958357	0.8169
chr18	30689347	30690347	0.8169
chr14	8402587	8403587	0.8168
chr15	9897546	9898546	0.8168
chr5	63574762	63575762	0.8168
chrX	20874775	20875775	0.8168
chr5	129241926	129242926	0.8167
chr3	18624101	18625101	0.8165
chr12	71349714	71350714	0.8163
chr13	23594732	23595732	0.8162
chr18	69722047	69723047	0.8162
chr4	130637786	130638786	0.8162
chr5	73892062	73893062	0.8162
chr14	122433979	122434979	0.8161
chr6	37688301	37689301	0.8161
chr8	33912629	33913629	0.8161
chr18	23514800	23515800	0.8159
chr8	128042201	128043201	0.8159
chr1	38823956	38824956	0.8157
chr13	47856032	47857032	0.8156
chr4	135579086	135580086	0.8156
chr10	25312895	25313895	0.8155
chr3	137832437	137833437	0.8155
chr5	127338231	127339231	0.8155
chr7	3586901	3587901	0.8154
chr10	121455045	121456045	0.8152
chr2	57256390	57257390	0.8152
chr17	28781456	28782456	0.8151
chr17	24794956	24795956	0.815
chr2	146301365	146302365	0.815
chr9	111575997	111576997	0.815
chr4	55474029	55475029	0.8149
chr1	70806027	70807027	0.8148
chr14	49447826	49448826	0.8148
chr19	37400711	37401711	0.8148
chr1	77472426	77473426	0.8147
chr9	58280194	58281194	0.8147
chr10	28425095	28426095	0.8146
chr14	57530164	57531164	0.8145
chr16	8838808	8839808	0.8144
chr13	20439132	20440132	0.8142
chr19	14666111	14667111	0.8142
chr10	76095956	76096956	0.8141
chr3	135544837	135545837	0.8141
chr15	37081346	37082346	0.8139
chr6	54698307	54699307	0.8139
chr14	92826082	92827082	0.8138
chr11	120805387	120806387	0.8137
chr11	77679299	77680299	0.8136
chr8	27240229	27241229	0.8136
chr2	6059055	6060055	0.8135
chr5	69489062	69490062	0.8135
chr5	118449192	118450192	0.8135
chr8	111649601	111650601	0.8135
chr11	7422698	7423698	0.8134
chr3	149218637	149219637	0.8134
chr12	54164714	54165714	0.8133
chr13	109839893	109840893	0.8133
chr10	121689545	121690545	0.8132
chr17	24794256	24795256	0.8131
chr17	80785961	80786961	0.8131
chr13	44751532	44752532	0.813
chr18	84933809	84934809	0.813
chr1	58188057	58189057	0.8128
chr1	87226026	87227026	0.8128
chr16	41633088	41634088	0.8128
chr4	54987529	54988529	0.8128
chr12	110835991	110836991	0.8126
chr9	55212094	55213094	0.8126
chr11	10337498	10338498	0.8125
chr10	84382556	84383556	0.8124
chr16	30693515	30694515	0.8123
chr5	144105532	144106532	0.8123
chr8	111765101	111766101	0.8123
chr1	113964624	113965624	0.8122
chr1	133397324	133398324	0.8121
chr10	92816156	92817156	0.8121
chr5	97218882	97219882	0.8121
chr12	83530551	83531551	0.812
chr3	34745479	34746479	0.812
chr5	148548825	148549825	0.812
chr8	3395001	3396001	0.812
chr12	12782895	12783895	0.8119
chr1	58958057	58959057	0.8115
chr5	12872301	12873301	0.8114
chr19	23167611	23168611	0.8113
chr6	67146407	67147407	0.8112
chr14	7953187	7954187	0.8111
chr9	88331763	88332763	0.8111
chr16	9284008	9285008	0.811
chr8	72315202	72316202	0.811
chr17	66439061	66440061	0.8109
chr11	55095899	55096899	0.8108
chr18	70539647	70540647	0.8108
chr14	105899984	105900984	0.8107
chr9	70047894	70048894	0.8107
chr1	136681024	136682024	0.8106
chr19	23169011	23170011	0.8105
chr16	90902456	90903456	0.8104
chr4	116725496	116726496	0.8104
chr2	75686344	75687344	0.8103
chr17	88159061	88160061	0.8102
chr1	4853920	4854920	0.81
chr15	11567746	11568746	0.8096
chr5	118434492	118435492	0.8096
chr8	84022002	84023002	0.8096
chr13	56142940	56143940	0.8095
chr4	110310696	110311696	0.8095
chr6	93978807	93979807	0.8095
chr13	111540893	111541893	0.8093
chr5	100671982	100672982	0.8093
chr18	33852647	33853647	0.8092
chr2	154424165	154425165	0.8091
chr10	82809656	82810656	0.809
chr5	14002101	14003101	0.8089
chr12	40984314	40985314	0.8088
chr1	58949657	58950657	0.8087
chr12	53032114	53033114	0.8086
chr2	170772201	170773201	0.8086
chr6	52077502	52078502	0.8086
chr13	60479440	60480440	0.8085
chr5	116453492	116454492	0.8085
chr16	48308988	48309988	0.8084
chr2	29074781	29075781	0.8083
chr6	92494807	92495807	0.8083
chr2	32174381	32175381	0.8081
chr1	4971520	4972520	0.808
chr9	32120116	32121116	0.8079
chr1	135198424	135199424	0.8078
chr11	46041399	46042399	0.8078
chr16	95953494	95954494	0.8078
chr12	39996614	39997614	0.8077
chr3	97540178	97541178	0.8077
chr16	22159828	22160828	0.8076
chr2	109942944	109943944	0.8076
chr11	20133298	20134298	0.8075
chr14	20216479	20217479	0.8075
chr18	61620947	61621947	0.8074
chr3	31001179	31002179	0.8074
chr18	54826747	54827747	0.8073
chr4	119069096	119070096	0.8073
chr17	38015856	38016856	0.8072
chr13	19628532	19629532	0.8071
chr5	110569282	110570282	0.8071
chr2	154426965	154427965	0.8069
chr5	135215631	135216631	0.8069
chr2	115747765	115748765	0.8068
chr8	126603001	126604001	0.8067
chrX	85076062	85077062	0.8067
chr3	30724679	30725679	0.8066
chr8	8484701	8485701	0.8066
chr8	84193502	84194502	0.8064
chr11	64089499	64090499	0.8063
chr13	19962432	19963432	0.8061
chr5	38588962	38589962	0.8061
chr11	26098701	26099701	0.8059
chr1	136679624	136680624	0.8056
chr1	77456326	77457326	0.8055
chr18	47474647	47475647	0.8054
chr8	118523601	118524601	0.8053
chr1	135724124	135725124	0.8052
chr10	28087695	28088695	0.8052
chr1	135174624	135175624	0.8051
chr17	69277561	69278561	0.8051
chr5	119578992	119579992	0.805
chr7	19741952	19742952	0.805
chr10	21100995	21101995	0.8048
chr14	60836264	60837264	0.8048
chr2	129245165	129246165	0.8048
chr5	147761325	147762325	0.8048
chr7	29454282	29455282	0.8048
chr10	4107839	4108839	0.8047
chr14	34315615	34316615	0.8047
chr5	53509462	53510462	0.8047
chr6	60642007	60643007	0.8047
chr12	35641129	35642129	0.8046
chr16	8831808	8832808	0.8046
chr18	46715147	46716147	0.8045
chr19	23133311	23134311	0.8042
chr7	80014915	80015915	0.804
chr12	53473814	53474814	0.8039
chr1	33940056	33941056	0.8037
chr14	11670887	11671887	0.8037
chr3	149220037	149221037	0.8037
chr8	35416747	35417747	0.8036
chr9	58274594	58275594	0.8036
chr18	65924547	65925547	0.8035
chr3	22033479	22034479	0.8035
chr13	111535993	111536993	0.8034
chr16	44280488	44281488	0.8034
chr16	48434988	48435988	0.8034
chr2	29500381	29501381	0.8034
chr18	24867900	24868900	0.8033
chr2	43365281	43366281	0.8033
chr4	135579786	135580786	0.8033
chr7	49448131	49449131	0.8033
chr2	149798565	149799565	0.8032
chr2	169728501	169729501	0.8032
chr4	138444886	138445886	0.8032
chr3	25128179	25129179	0.8031
chr4	12770154	12771154	0.8031
[truncated: 43 more rows]
